# Supplementary material for: Analysis of Studies on Digital Strategy: A Bibliometric Study
Source: Preprints.org preprint supplement (doi:10.20944/preprints202409.2428.v1), 2024-10-01
Supplement: Supplementary file 1 [file supplementary]

## Sheet: Sheet
Row Labels	Count of UT (Unique WOS ID)
Article	605
Article; Book Chapter	25
Article; Early Access	37
Article; Proceedings Paper	6
Article; Retracted Publication	1
Grand Total	674

## Sheet: savedrecs
Publication Type	Authors	Book Authors	Book Editors	Book Group Authors	Author Full Names	Book Author Full Names	Group Authors	Article Title	Source Title	Book Series Title	Book Series Subtitle	Language	Document Type	Conference Title	Conference Date	Conference Location	Conference Sponsor	Conference Host	Author Keywords	Keywords Plus	Abstract	Addresses	Affiliations	Reprint Addresses	Email Addresses	Researcher Ids	ORCIDs	Funding Orgs	Funding Name Preferred	Funding Text	Cited References	Cited Reference Count	Times Cited, WoS Core	Times Cited, All Databases	180 Day Usage Count	Since 2013 Usage Count	Publisher	Publisher City	Publisher Address	ISSN	eISSN	ISBN	Journal Abbreviation	Journal ISO Abbreviation	Publication Date	Publication Year	Volume	Issue	Part Number
J	Yoo, YJ; Henfridsson, O; Lyytinen, K				Yoo, Youngjin; Henfridsson, Ola; Lyytinen, Kalle			The New Organizing Logic of Digital Innovation: An Agenda for Information Systems Research	INFORMATION SYSTEMS RESEARCH			English	Article						digitization; digital innovation; product architecture; layered modular architecture; organizing logic; doubly distributed networks	TECHNOLOGY; ARCHITECTURE; EVOLUTION; INTERNET; CALL; FIRM	In this essay, we argue that pervasive digitization gives birth to a new type of product architecture: the layered modular architecture. The layered modular architecture extends the modular architecture of physical products by incorporating four loosely coupled layers of devices, networks, services, and contents created by digital technology. We posit that this new architecture instigates profoun…	[Yoo, Youngjin] Temple Univ, Ctr Design & Innovat, Philadelphia, PA 19122 USA; [Henfridsson, Ola] Viktoria Inst Horselgangen 4, S-41756 Gothenburg, Sweden; [Henfridsson, Ola] Univ Oslo, Dept Informat, N-0316 Oslo, Norway; [Lyytinen, Kalle] Case Western Reserve Univ, Dept Informat Syst, Cleveland, OH 44106 USA	Pennsylvania Commonwealth System of Higher Education (PCSHE); Temple University; University of Oslo; Case Western Reserve University	Yoo, YJ (corresponding author), Temple Univ, Ctr Design & Innovat, Philadelphia, PA 19122 USA.	yxy23yoo@gmail.com; ola.henfridsson@viktoria.se; kjl13@case.edu	Yoo, Youngjin/ABI-7778-2020; Lyytinen, Kalle/O-8202-2017	Yoo, Youngjin/0000-0001-8548-3475; Lyytinen, Kalle/0000-0002-3352-5343; Henfridsson, Ola/0000-0003-1605-5180	Direct For Computer & Info Scie & Enginr; Office of Advanced Cyberinfrastructure (OAC) [0943157, 0943010] Funding Source: National Science Foundation	Direct For Computer & Info Scie & Enginr; Office of Advanced Cyberinfrastructure (OAC)(National Science Foundation (NSF)NSF - Directorate for Computer & Information Science & Engineering (CISE))			39	1231	1282	99	923	INFORMS	HANOVER	7240 PARKWAY DR, STE 310, HANOVER, MD 21076-1344 USA	1047-7047			INFORM SYST RES	Inf. Syst. Res.	DEC	2010	21	4
J	Bharadwaj, A; El Sawy, OA; Pavlou, PA; Venkatraman, N				Bharadwaj, Anandhi; El Sawy, Omar A.; Pavlou, Paul A.; Venkatraman, N.			DIGITAL BUSINESS STRATEGY: TOWARD A NEXT GENERATION OF INSIGHTS	MIS QUARTERLY			English	Article						Digital business strategy; scope of digital business strategy; scale of digital business strategy; speed of digital business strategy; digital business strategy value creation and capture	RESOURCE-BASED VIEW; INFORMATION-TECHNOLOGY; COMPETITIVE ADVANTAGE; RELATIONAL VALUE; ALIGNMENT; FIRM; CAPABILITIES; KNOWLEDGE; INTERFIRM; SYSTEMS	Over the last three decades, the prevailing view of information technology strategy has been that it is a functional-level strategy that must be aligned with the firm's chosen business strategy. Even within this so-called alignment view, business strategy directed IT strategy. During the last decade, the business infrastructure has become digital with increased interconnections among products, pr…	[Bharadwaj, Anandhi] Emory Univ, Goizueta Business Sch, Atlanta, GA 30332 USA; [El Sawy, Omar A.] Univ So Calif, Marshall Sch Business, Los Angeles, CA 90089 USA; [Pavlou, Paul A.] Temple Univ, Fox Sch Business, Philadelphia, PA 19122 USA; [Venkatraman, N.] Boston Univ, Sch Management, Boston, MA 02215 USA	Emory University; University of Southern California; Pennsylvania Commonwealth System of Higher Education (PCSHE); Temple University; Boston University	Bharadwaj, A (corresponding author), Emory Univ, Goizueta Business Sch, Atlanta, GA 30332 USA.	abharad@emory.edu; elsawy@marshall.usc.edu; pavlou@temple.edu; venkat@bu.edu	Pavlou, Paul A/D-3561-2014; Venkatraman, N. Venkat/AAB-2555-2019; El Sawy, Omar/ABG-7773-2021	Bharadwaj, Anandhi/0000-0002-5909-4983					55	1212	1244	186	1363	SOC INFORM MANAGE-MIS RES CENT	MINNEAPOLIS	UNIV MINNESOTA-SCH MANAGEMENT 271 19TH AVE SOUTH, MINNEAPOLIS, MN 55455 USA	0276-7783			MIS QUART	MIS Q.	JUN	2013	37	2
J	Horváth, D; Szabó, RZ				Horvath, Dora; Szabo, Roland Zs.			Driving forces and barriers of Industry 4.0: Do multinational and small and medium-sized companies have equal opportunities?	TECHNOLOGICAL FORECASTING AND SOCIAL CHANGE			English	Article						Industry 4.0; Digital strategy; Management functions; Lean; Qualitative; Supply chain	DIGITAL TRANSFORMATION; ENTERPRISES; TECHNOLOGY; INTERNET; THINGS; FUTURE; FIRMS; PERFORMANCE; INNOVATION; RESOURCES	The Fourth Industrial Revolution poses significant challenges to manufacturing companies from the technological, organizational and management points of view. This paper aims to explore how top executives interpret the concept of Industry 4.0, the driving forces for introducing new technologies and the main barriers to Industry 4.0. The authors applied a qualitative case study design involving 26…	[Horvath, Dora; Szabo, Roland Zs.] Corvinus Univ Budapest, Res Ctr Strateg & Int Management, Fovam Sq 8, H-1093Y Budapest, Hungary		Horváth, D (corresponding author), Corvinus Univ Budapest, Res Ctr Strateg & Int Management, Fovam Sq 8, H-1093Y Budapest, Hungary.	horvath.dora@uni-corvinus.hu; zsoltroland.szabo@uni-corvinus.hu	N'Dri, Amoin Bernadine/IWD-7811-2023; Roland, Szabó/AEP-0961-2022; Szabó, Roland Zs./AAZ-4482-2020	Roland, Szabó/0000-0002-7961-1298; Szabó, Roland Zs./0000-0002-7961-1298	European Union [EFOP-3.6.2.-16-2017-00007]	European Union(European Union (EU))	The publication was prepared within the Szechenyi 2020 program framework (EFOP-3.6.2.-16-2017-00007) under the European Union project titled: Aspects of developing an intelligent, sustainable and inclusive society: social, technological, innovation networks in employment and digital economy. We are grateful to Melissa Leffler, freelance language editor, for proofreading a draft of this paper.		119	435	444	64	472	ELSEVIER SCIENCE INC	NEW YORK	STE 800, 230 PARK AVE, NEW YORK, NY 10169 USA	0040-1625	1873-5509		TECHNOL FORECAST SOC	Technol. Forecast. Soc. Chang.	SEP	2019	146
J	Dwivedi, YK; Hughes, DL; Coombs, C; Constantiou, I; Duan, YQ; Edwards, JS; Gupta, B; Lal, B; Misra, S; Prashant, P; Raman, R; Rana, NP; Sharma, SK; Upadhyay, N				Dwivedi, Yogesh K.; Hughes, D. Laurie; Coombs, Crispin; Constantiou, Ioanna; Duan, Yanqing; Edwards, John S.; Gupta, Babita; Lal, Banita; Misra, Santosh; Prashant, Prakhar; Raman, Ramakrishnan; Rana, Nripendra P.; Sharma, Sujeet K.; Upadhyay, Nitin			Impact of COVID-19 pandemic on information management research and practice: Transforming education, work and life	INTERNATIONAL JOURNAL OF INFORMATION MANAGEMENT			English	Article						COVID-19; Digital life; Digital transformation; Digital world; Information management; Information systems; Information technology	HOMEWORKERS USAGE; SHARING ECONOMY; MOBILE PHONES; BENEFITS	The COVID-19 pandemic has forced many organisations to undergo significant transformation, rethinking key elements of their business processes and use of technology to maintain operations whilst adhering to a changing landscape of guidelines and new procedures. This study offers a collective insight to many of the key issues and underlying complexities affecting organisations and society from COV…	[Dwivedi, Yogesh K.; Hughes, D. Laurie] Swansea Univ, Sch Management, Emerging Markets Res Ctr EMaRC, Bay Campus, Swansea, W Glam, Wales; [Coombs, Crispin] Loughborough Univ, Sch Business & Econ, Loughborough, Leics, England; [Constantiou, Ioanna] Copenhagen Business Sch, Dept Digitalisat, Copenhagen, Denmark; [Duan, Yanqing] Univ Bedfordshire, Business & Management Res Inst, Luton, Beds, England…	Swansea University; Loughborough University; Copenhagen Business School; University of Bedfordshire; Aston University; University of Bradford; Symbiosis International University; Symbiosis Institute of Business Management (SIBM) Pune; Indian Institute of Management (IIM System); Indian Institute of Management Tiruchirappalli; Goa Institute of Management	Rana, NP (corresponding author), Univ Bradford, Sch Management, Bradford, W Yorkshire, England.	y.k.dwivedi@swansea.ac.uk; d.l.hughes@swansea.ac.uk; c.r.coombs@lboro.ac.uk; ic.digi@cbs.dk; yanqing.duan@beds.ac.uk; j.s.edwards@aston.ac.uk; bgupta@csumb.edu; B.lall@bradford.ac.uk; santoshmisra@gmail.com; sabapscorp@gmail.com; director@sibmpune.edu.in; n.p.rana@bradford.ac.uk; sujeet@iimtrichy.ac.in; nitin@gim.ac.in	Rana, Nripendra P./AAY-1576-2021; Rana, Nripendra P./ABA-4719-2020; Raman, Ramakrishnan/U-2170-2017; Dwivedi, Yogesh Kumar/A-5362-2008; Pune, SIBM/Z-5178-2019; Edwards, John Steven/AAC-9878-2020	Rana, Nripendra P./0000-0003-1105-8729; Raman, Ramakrishnan/0000-0003-3642-6989; Dwivedi, Yogesh Kumar/0000-0002-5547-9990; Edwards, John Steven/0000-0003-3979-017X; Upadhyay, Nitin/0000-0001-8301-8924; Constantiou, Ioanna/0000-0002-9761-1208					92	372	376	30	542	ELSEVIER SCI LTD	OXFORD	THE BOULEVARD, LANGFORD LANE, KIDLINGTON, OXFORD OX5 1GB, OXON, ENGLAND	0268-4012	1873-4707		INT J INFORM MANAGE	Int. J. Inf. Manage.	DEC	2020	55
J	Raj, A; Dwivedi, G; Sharma, A; Jabbour, ABLD; Rajak, S				Raj, Alok; Dwivedi, Gourav; Sharma, Ankit; Lopes de Sousa Jabbour, Ana Beatriz; Rajak, Sonu			Barriers to the adoption of industry 4.0 technologies in the manufacturing sector: An inter-country comparative perspective	INTERNATIONAL JOURNAL OF PRODUCTION ECONOMICS			English	Article						Industry 4.0; Barriers; Grey-DEMATEL; Developed economy; Developing economy	RESEARCH AGENDA; CHALLENGES; DEMATEL; FUTURE; INTERNET; THINGS; MODEL; INITIATIVES; INFORMATION; COMPANIES	This paper examines barriers to the implementation of Industry 4.0 technologies in the manufacturing sector in the context of both developed and developing economies. A comprehensive literature review, followed by discussions with industry experts, identifies 15 barriers, which are analyzed by means of a Grey Decision-Making Trial and Evaluation Laboratory (DEMATEL) approach. The 'lack of a digit…	[Raj, Alok] Xavier Sch Management CH Area East, XLRI, Prod Operat & Decis Sci, Jamshedpur 831001, Bihar, India; [Dwivedi, Gourav] Indian Inst Technol Delhi, Dept Management Studies, New Delhi 110016, India; [Sharma, Ankit] Indian Inst Management Lucknow, Operat Management Area, Off Sitapur Rd, Lucknow 226013, Uttar Pradesh, India; [Lopes de Sousa Jabbour, Ana Beatriz] Montpellier Business Sch Mon…	XLRI -Xavier School of Management; Indian Institute of Technology System (IIT System); Indian Institute of Technology (IIT) - Delhi; Indian Institute of Management (IIM System); Indian Institute of Management Lucknow; Universite de Montpellier; Birla Institute of Technology Mesra	Raj, A (corresponding author), Xavier Sch Management CH Area East, XLRI, Prod Operat & Decis Sci, Jamshedpur 831001, Bihar, India.	alokraj@xlri.ac.in; gourav@dms.iitd.ac.in; fpm17014@iiml.ac.in; a.sousa-jabbour@montpellier-bs.com; sonu.production@gmail.com	Rajak, Sonu/AAE-8690-2021; Lopes de Sousa Jabbour, Ana Beatriz/B-8966-2012; Sharma, Ankit/W-2230-2018; Rajak, Sonu/AAC-8544-2022	Rajak, Sonu/0000-0002-4334-8010; Lopes de Sousa Jabbour, Ana Beatriz/0000-0001-6423-8868; Sharma, Ankit/0000-0003-1418-8991; Rajak, Sonu/0000-0002-4334-8010					66	349	352	46	295	ELSEVIER	AMSTERDAM	RADARWEG 29, 1043 NX AMSTERDAM, NETHERLANDS	0925-5273	1873-7579		INT J PROD ECON	Int. J. Prod. Econ.	JUN	2020	224
J	Sebastian, IM; Ross, JW; Beath, C; Mocker, M; Moloney, KG; Fonstad, NO				Sebastian, Ina M.; Ross, Jeanne W.; Beath, Cynthia; Mocker, Martin; Moloney, Kate G.; Fonstad, Nils O.			How Big Old Companies Navigate Digital Transformation	MIS QUARTERLY EXECUTIVE			English	Article							INFORMATION-SYSTEMS; CONNECTED PRODUCTS; STRATEGY; SMART	New digital technologies present both game-changing opportunities for-and existential threats to-companies whose success was built in the pre-digital economy. This article describes our findings from a study of 25 companies that were embarking on digital transformation journeys. We identified two digital strategies-customer engagement and digitized solutions-that provide direction for a digital t…	[Sebastian, Ina M.; Ross, Jeanne W.; Mocker, Martin; Moloney, Kate G.; Fonstad, Nils O.] MIT, Sloan Ctr Informat Syst Res, Cambridge, MA 02139 USA; [Beath, Cynthia] Univ Texas Austin, McCombs Sch Business, Austin, TX 78712 USA; [Mocker, Martin] Reutlingen Univ, Informat Syst, ESB Business Sch, Reutlingen, Germany	Massachusetts Institute of Technology (MIT); University of Texas System; University of Texas Austin	Sebastian, IM (corresponding author), MIT, Sloan Ctr Informat Syst Res, Cambridge, MA 02139 USA.	isebasti@mit.edu; jross@mit.edu; cbeath@mail.utexas.edu; martin.mocker@reutlingen-university.de; nilsfonstad@mit.edu	Celestino, Leandro/HIR-4215-2022						17	335	338	62	524	INDIANA UNIV, OPER & DECISION TECHNOL DEPT	BLOOMINGTON	KELLEY SCH BUS, E 10 ST, BLOOMINGTON, IN 47405-1701 USA	1540-1960	1540-1979		MIS Q EXEC	MIS Q. Exec.	SEP	2017	16	3
J	Helbig, N; Gil-García, JR; Ferro, E				Helbig, Natalie; Gil-Garcia, J. Ramon; Ferro, Enrico			Understanding the complexity of electronic government: Implications from the digital divide literature	GOVERNMENT INFORMATION QUARTERLY			English	Article						Electronic government; Digital government; Digital divide; Public management; Inclusion policies; IT strategies; Theory development	TECHNOLOGY; INFORMATION; DEMOCRACY; EVOLUTION; BENEFITS; SERVICES; SYSTEMS; GENDER	Theoretically and practically E-Government and the digital divide are intertwined social phenomena. Using sophisticated information technologies (IT) in government has little social value if citizens are not able to use services or interact in political processes in meaningful ways. Similarly, understanding the development and use of IT in government without incorporating a demand perspective wou…	[Helbig, Natalie] SUNY Albany, Rockefeller Coll Publ Affairs & Policy, Albany, NY 12222 USA; [Gil-Garcia, J. Ramon] Ctr Invest & Docencia Econ, Dept Publ Adm, Mexico City, DF, Mexico; [Gil-Garcia, J. Ramon] CIDE, Data Ctr Appl Res Social Sci, Mexico City, DF, Mexico	State University of New York (SUNY) System; State University of New York (SUNY) Albany; Centro de Investigacion y Docencia Economicas A.C. (CIDE); Centro de Investigacion y Docencia Economicas A.C. (CIDE)	Helbig, N (corresponding author), SUNY Albany, Rockefeller Coll Publ Affairs & Policy, Albany, NY 12222 USA.	nh6739@albany.edu; joseramon.gil@cide.edu; ferro@ismb.it	Gil-Garcia, J. Ramon/A-9636-2009	Gil-Garcia, J. Ramon/0000-0002-1033-4974; Ferro, Enrico/0000-0002-4853-0444					80	241	247	19	205	ELSEVIER INC	SAN DIEGO	525 B STREET, STE 1900, SAN DIEGO, CA 92101-4495 USA	0740-624X	1872-9517		GOV INFORM Q	Gov. Inf. Q.	JAN	2009	26	1
J	Yeow, A; Soh, C; Hansen, R				Yeow, Adrian; Soh, Christina; Hansen, Rina			Aligning with new digital strategy: A dynamic capabilities approach	JOURNAL OF STRATEGIC INFORMATION SYSTEMS			English	Article						Aligning; Dynamic capabilities; Digital strategy; Tension; B2C ecommerce; IT Alignment	BUSINESS STRATEGY; INFORMATION-TECHNOLOGY; EQUILIBRIUM-MODEL; ALIGNMENT; PERFORMANCE; SYSTEMS; PERSPECTIVE; MANAGEMENT; INSIGHTS; PARADOX	Prior IS research has not fully addressed the aligning process in the highly dynamic context of digital strategy. To address this gap, we conduct a longitudinal analysis of a B2B company's journey to enact its B2C digital strategy, using the dynamic capabilities approach. We found that as an organization shifts towards a digital strategy, misalignments between the emergent strategy and resources …	[Yeow, Adrian] Singapore Univ Social Sci, Sch Business, 461 Clementi Rd, Singapore 599491, Singapore; [Soh, Christina] Nanyang Technol Univ, Nanyang Business Sch, Div Informat Technol & Operat Management, 50 Nanyang Ave, Singapore 639798, Singapore; [Hansen, Rina] Copenhagen Business Sch, Dept Digitalizat, Howitzvej 60,3, DK-2000 Frederiksberg, Denmark	Singapore University of Social Sciences (SUSS); Nanyang Technological University & National Institute of Education (NIE) Singapore; Nanyang Technological University; Copenhagen Business School	Yeow, A (corresponding author), Singapore Univ Social Sci, Sch Business, 461 Clementi Rd, Singapore 599491, Singapore.	adrianyeowyk@suss.edu.sg; acsoh@ntu.edu.sg; rinahansen@hotmail.com	Yeow, Adrian/J-7274-2019	Yeow, Adrian/0000-0003-1355-8540					71	238	244	56	401	ELSEVIER	AMSTERDAM	RADARWEG 29, 1043 NX AMSTERDAM, NETHERLANDS	0963-8687	1873-1198		J STRATEGIC INF SYST	J. Strateg. Inf. Syst.	MAR	2018	27	1
J	Perboli, G; Musso, S; Rosano, M				Perboli, Guido; Musso, Stefano; Rosano, Mariangela			Blockchain in Logistics and Supply Chain: A Lean Approach for Designing Real-World Use Cases	IEEE ACCESS			English	Article						Blockchain; hyperledger; supply chain		The Blockchain technology can be defined as a distributed ledger database for recording transactions between parties verifiably and permanently. Blockchain emerged as a leading technology layer for financial applications. Nevertheless, in the past years, the attention of researchers and practitioners moved to the application of the Blockchain technologies to other domains. Recently, it represents…	[Perboli, Guido; Musso, Stefano; Rosano, Mariangela] Politecn Torino, DAUIN, I-10129 Turin, Italy; [Perboli, Guido; Musso, Stefano; Rosano, Mariangela] Politecn Torino, ICT City Logist & Enterprises Ctr, I-10129 Turin, Italy; [Perboli, Guido] Ctr Interuniv Rech Reseaux Entreprise Logist & Tr, Montreal, PQ H3T 1J4, Canada	Polytechnic University of Turin; Polytechnic University of Turin; Universite de Montreal	Rosano, M (corresponding author), Politecn Torino, DAUIN, I-10129 Turin, Italy.;Rosano, M (corresponding author), Politecn Torino, ICT City Logist & Enterprises Ctr, I-10129 Turin, Italy.	mariangela.rosano@polito.it	Musso, Stefano/AAW-5765-2021; Perboli, Guido/G-1049-2014; ROSANO, MARIANGELA/AAV-7150-2021	Perboli, Guido/0000-0001-6900-9917; ROSANO, MARIANGELA/0000-0002-6879-827X					38	235	238	18	249	IEEE-INST ELECTRICAL ELECTRONICS ENGINEERS INC	PISCATAWAY	445 HOES LANE, PISCATAWAY, NJ 08855-4141 USA	2169-3536			IEEE ACCESS	IEEE Access		2018	6
J	Bossetta, M				Bossetta, Michael			The Digital Architectures of Social Media: Comparing Political Campaigning on Facebook, Twitter, Instagram, and Snapchat in the 2016 US Election	JOURNALISM & MASS COMMUNICATION QUARTERLY			English	Article						political communication; affordances; primaries; digital marketing	AFFORDANCES; ONLINE; COMMUNICATION; DELIBERATION; POWER	The present study argues that political communication on social media is mediated by a platform's digital architecturethe technical protocols that enable, constrain, and shape user behavior in a virtual space. A framework for understanding digital architectures is introduced, and four platforms (Facebook, Twitter, Instagram, and Snapchat) are compared along the typology. Using the 2016 U.S. elect…	[Bossetta, Michael] Univ Copenhagen, Ctr European Polit, Dept Polit Sci, Copenhagen, Denmark	University of Copenhagen	Bossetta, M (corresponding author), Univ Copenhagen, Dept Polit Sci, Oster Farimagsgade 5, DK-1353 Copenhagen K, Denmark.	mjb@ifs.ku.dk	Bossetta, Michael/AAC-6991-2021; 黄, 荣 昌/HGA-6762-2022	Bossetta, Michael/0000-0002-8611-5487;					63	213	220	23	174	SAGE PUBLICATIONS INC	THOUSAND OAKS	2455 TELLER RD, THOUSAND OAKS, CA 91320 USA	1077-6990	2161-430X		J MASS COMMUN Q	Journal. Mass Commun. Q.	JUN	2018	95	2
J	Chanias, S; Myers, MD; Hess, T				Chanias, Simon; Myers, Michael D.; Hess, Thomas			Digital transformation strategy making in pre-digital organizations: The case of a financial services provider	JOURNAL OF STRATEGIC INFORMATION SYSTEMS			English	Article						Digital transformation strategy; IS strategizing; Interpretive case study; Financial services	INFORMATION-SYSTEMS STRATEGY; AS-PRACTICE; IMPLEMENTATION; TECHNOLOGY; CAPABILITIES; ETHNOGRAPHY; INNOVATION; CONTEXT; FIELD; VIEW	The formulation and implementation of a digital transformation strategy (DTS) has become a key concern for many pre-digital organizations across traditional industries, but how such a strategy can be developed remains an open question. We used interpretive in-depth case study research to study how a European financial services provider has formulated and implemented a DTS. By focusing on the unde…	[Chanias, Simon; Hess, Thomas] Ludwig Maximilians Univ Munchen, Inst Informat Syst & New Media, Ludwigstr 28, D-80539 Munich, Germany; [Myers, Michael D.] Univ Auckland, Business Sch, Dept Informat Syst & Operat Management, Auckland 1010, New Zealand	University of Munich; University of Auckland	Myers, MD (corresponding author), Univ Auckland, Business Sch, Dept Informat Syst & Operat Management, Auckland 1010, New Zealand.	chanias@bwl.lmu.de; m.myers@auckland.ac.nz; thess@bwl.lmu.de	Hess, Thomas K/A-1774-2016; Myers, Michael David/F-9405-2010	Myers, Michael David/0000-0001-8525-6395; Hess, Thomas/0000-0003-3969-7477					73	209	220	64	501	ELSEVIER	AMSTERDAM	RADARWEG 29, 1043 NX AMSTERDAM, NETHERLANDS	0963-8687	1873-1198		J STRATEGIC INF SYST	J. Strateg. Inf. Syst.	MAR	2019	28	1
J	Mithas, S; Tafti, A; Mitchell, W				Mithas, Sunil; Tafti, Ali; Mitchell, Will			HOW A FIRM'S COMPETITIVE ENVIRONMENT AND DIGITAL STRATEGIC POSTURE INFLUENCE DIGITAL BUSINESS STRATEGY	MIS QUARTERLY			English	Article						Digital business strategy; strategic posture; industry environment; industry turbulence; industry competition; industry growth; IT investments; IT strategy	INFORMATION-TECHNOLOGY; MARKET VALUE; INDUSTRY CONCENTRATION; PERFORMANCE; PRODUCTIVITY; CAPABILITIES; MUNIFICENCE; INVESTMENT; ORGANIZATIONS; UNCERTAINTY	In this paper, we examine how the competitive industry environment shapes the way that digital strategic posture (defined as a focal firm's degree of engagement in a particular class of digital business practices relative to the industry norm) influences firms' realized digital business strategy. We focus on two forms of digital strategy: general IT investment and IT outsourcing investment. Drawi…	[Mithas, Sunil] Univ Maryland, Robert H Smith Sch Business, College Pk, MD 20742 USA; [Tafti, Ali] Univ Illinois, Coll Business, Champaign, IL 61820 USA; [Mitchell, Will] Univ Toronto, Rotman Sch Management, Toronto, ON, Canada; [Mitchell, Will] Duke Univ, Durham, NC 27708 USA	University System of Maryland; University of Maryland College Park; University of Illinois System; University of Illinois Urbana-Champaign; University of Toronto; Duke University	Mithas, S (corresponding author), Univ Maryland, Robert H Smith Sch Business, Van Munching Hall, College Pk, MD 20742 USA.	smithas@rhsmith.umd.edu; atafti@illinois.edu; william.mitchell@rotman.utoronto.ca	N'Dri, Amoin Bernadine/IWD-7811-2023	Mithas, Sunil/0000-0002-2182-6202					99	197	199	41	371	SOC INFORM MANAGE-MIS RES CENT	MINNEAPOLIS	UNIV MINNESOTA-SCH MANAGEMENT 271 19TH AVE SOUTH, MINNEAPOLIS, MN 55455 USA	0276-7783			MIS QUART	MIS Q.	JUN	2013	37	2
J	Correani, A; De Massis, A; Frattini, F; Petruzzelli, AM; Natalicchio, A				Correani, Alessia; De Massis, Alfredo; Frattini, Federico; Petruzzelli, Antonio Messeni; Natalicchio, Angelo			Implementing a Digital Strategy: Learning from the Experience of Three Digital Transformation Projects	CALIFORNIA MANAGEMENT REVIEW			English	Article						digital transformation; digital strategy; strategy implementation	BUSINESS MODEL; FUTURE; ORGANIZATION; PERSPECTIVE; TECHNOLOGY; INNOVATION; RESOURCES; INDUSTRY	The rapid growth of digital technologies and the extraordinary amount of data that devices and applications collect each day are increasingly driving companies to radically transform the business architecture through which they create and appropriate value. However, companies may fail to extract value from digital transformation due to the disconnection between strategy formulation and strategy i…	[Correani, Alessia] Microsoft Italy, Milan, Italy; [De Massis, Alfredo] Free Univ Bozen Bolzano, Bolzano, Italy; [De Massis, Alfredo] Univ Lancaster, Lancaster, England; [De Massis, Alfredo] Zhejiang Univ, Hangzhou, Peoples R China; [Frattini, Federico] Politecn Milan, Milan, Italy; [Petruzzelli, Antonio Messeni; Natalicchio, Angelo] Politecn Bari, Bari, Italy	Free University of Bozen-Bolzano; Lancaster University; Zhejiang University; Polytechnic University of Milan; Politecnico di Bari	Correani, A (corresponding author), Microsoft Italy, Milan, Italy.			FRATTINI, FEDERICO/0000-0001-5100-3605					60	171	172	143	737	SAGE PUBLICATIONS INC	THOUSAND OAKS	2455 TELLER RD, THOUSAND OAKS, CA 91320 USA	0008-1256	2162-8564		CALIF MANAGE REV	Calif. Manage. Rev.	AUG	2020	62	4
J	Eller, R; Alford, P; Kallmünzer, A; Peters, M				Eller, Robert; Alford, Philip; Kallmunzer, Andreas; Peters, Mike			Antecedents, consequences, and challenges of small and medium-sized enterprise digitalization	JOURNAL OF BUSINESS RESEARCH			English	Article						SME digitalization; Financial performance; Employee skill; Digital strategy; Resource-based view; Digital identity	FIRM PERFORMANCE; INFORMATION-TECHNOLOGY; COMPETITIVE ADVANTAGE; SOCIAL MEDIA; BUSINESS; CAPABILITIES; INNOVATION; TRANSFORMATION; STRATEGY; IDENTITY	Small and medium-sized enterprises (SMEs) lag behind larger firms when it comes to digitalization. This has negative impacts on firm performance. Despite the economic importance of SMEs, little is known about the antecedents, consequences, and challenges of SME digitalization. We have set three objectives to address this knowledge gap. Drawing on the resource-based view, we first investigate the …	[Eller, Robert; Peters, Mike] Univ Innsbruck, Karl Rahner Pl 3, A-6020 Innsbruck, Austria; [Alford, Philip] Univ Southampton, Southampton Business Sch, Univ Rd, Southampton SO17 1BJ, Hants, England; [Kallmunzer, Andreas] La Rochelle Business Sch CERIIM, 102 Rue Coureilles, F-17000 La Rochelle, France	University of Innsbruck; University of Southampton; Solent University	Eller, R (corresponding author), Univ Innsbruck, Dept Strateg Management Mkt & Tourism, Karl Rahner Pl 3, A-6020 Innsbruck, Austria.	robert.eller@uibk.ac.at; p.r.alford@soton.ac.uk; kallmuenzera@excelia-group.com; mike.peters@uibk.ac.at	Eller, Robert/ABB-2966-2021; Kallmuenzer, Andreas/J-2880-2019; Peters, Mike/K-3253-2019	Eller, Robert/0000-0003-2601-5182; Kallmuenzer, Andreas/0000-0002-8808-1743; Alford, Philip/0000-0003-1415-3748					87	166	171	166	718	ELSEVIER SCIENCE INC	NEW YORK	STE 800, 230 PARK AVE, NEW YORK, NY 10169 USA	0148-2963	1873-7978		J BUS RES	J. Bus. Res.	MAY	2020	112
J	Kreiss, D; McGregor, SC				Kreiss, Daniel; McGregor, Shannon C.			Technology Firms Shape Political Communication: The Work of Microsoft, Facebook, Twitter, and Google With Campaigns During the 2016 US Presidential Cycle	POLITICAL COMMUNICATION			English	Article						Facebook; 2016 US Presidential Election; digital politics; political campaigning; social media		This article offers the first analysis of the role that technology companies, specifically Facebook, Twitter, Microsoft, and Google, play in shaping the political communication of electoral campaigns in the United States. We offer an empirical analysis of the work technology firms do around electoral politics through interviews with staffers at these firms and digital and social media directors o…	[Kreiss, Daniel] Univ N Carolina, Sch Media & Journalism, Carroll Hall,CB 3365, Chapel Hill, NC 27599 USA; [McGregor, Shannon C.] Univ Utah, Dept Commun, 255 Cent Campus Dr 2400, Salt Lake City, UT 84112 USA	University of North Carolina; University of North Carolina Chapel Hill; Utah System of Higher Education; University of Utah	Kreiss, D (corresponding author), Univ N Carolina, Sch Media & Journalism, Carroll Hall,CB 3365, Chapel Hill, NC 27599 USA.	dkreiss@email.unc.edu; shannon.c.mgregor@gmail.com	黄, 荣 昌/HGA-6762-2022; McGregor, Shannon C/AAO-1718-2020	McGregor, Shannon/0000-0002-3275-0397	Social Media Collective at Microsoft Research	Social Media Collective at Microsoft Research(Microsoft)	The authors would like to thank Sarah Flowers, Laura Meadows, Cara Schumann, and Shannon Zenner for their invaluable field research at the 2016 Democratic National Convention. Shannon C. McGregor also wishes to thank the Social Media Collective at Microsoft Research for their support in the early stages of this project.		38	131	134	17	177	TAYLOR & FRANCIS INC	PHILADELPHIA	530 WALNUT STREET, STE 850, PHILADELPHIA, PA 19106 USA	1058-4609	1091-7675		POLIT COMMUN	Polit. Commun.		2018	35	2
J	Barrett, M; Oborn, E; Orlikowski, W				Barrett, Michael; Oborn, Eivor; Orlikowski, Wanda			Creating Value in Online Communities: The Sociomaterial Configuring of Strategy, Platform, and Stakeholder Engagement	INFORMATION SYSTEMS RESEARCH			English	Article						digital; online communities; health IT; value; computer-mediated communication and collaboration	SOCIAL MEDIA; KNOWLEDGE CONTRIBUTION; SERVICE INNOVATION; DOMINANT LOGIC; SOFTWARE; ORGANIZATIONS; CAPABILITIES; ARCHITECTURE; GOVERNANCE; COCREATION	How is value created in an online community (OC) over time? We explored this question through a longitudinal field study of an OC in the healthcare arena. We found that multiple kinds of value were produced and changed over time as different participants engaged with the OC and its evolving technology in various ways. To explain our findings, we theorize OC value as performed through the ongoing …	[Barrett, Michael] Univ Cambridge, Judge Business Sch, Cambridge CB2 1AG, England; [Oborn, Eivor] Univ Warwick, Warwick Business Sch, Coventry CV4 7AL, W Midlands, England; [Orlikowski, Wanda] MIT, Sloan Sch Management, Cambridge, MA 02142 USA	University of Cambridge; University of Warwick; Massachusetts Institute of Technology (MIT)	Barrett, M (corresponding author), Univ Cambridge, Judge Business Sch, Cambridge CB2 1AG, England.	m.barrett@jbs.cam.ac.uk; eivor.oborn@wbs.ac.uk; wanda@mit.edu	Munshi, Aviva/JDC-3827-2023		National Institute for Health Research (NIHR) Collaborations for Leadership in Applied Health Research and Care (CLAHRC) West Midlands; NIHR Cambridge; Peterborough CLAHRC	National Institute for Health Research (NIHR) Collaborations for Leadership in Applied Health Research and Care (CLAHRC) West Midlands(National Institutes of Health Research (NIHR)); NIHR Cambridge; Peterborough CLAHRC	The authors thank the members of SocialHealth, who kindly gave access and participated in this study. The authors are also grateful for the valuable guidance provided by the special issue editors, associate editor, and reviewers during the revision process. E. Oborn is supported by the National Institute for Health Research (NIHR) Collaborations for Leadership in Applied Health Research and Care …		79	117	117	25	393	INFORMS	CATONSVILLE	5521 RESEARCH PARK DR, SUITE 200, CATONSVILLE, MD 21228 USA	1047-7047	1526-5536		INFORM SYST RES	Inf. Syst. Res.	DEC	2016	27	4
J	Bucci, S; Barrowclough, C; Ainsworth, J; Machin, M; Morris, R; Berry, K; Emsley, R; Lewis, S; Edge, D; Buchan, I; Haddock, G				Bucci, Sandra; Barrowclough, Christine; Ainsworth, John; Machin, Matthew; Morris, Rohan; Berry, Katherine; Emsley, Richard; Lewis, Shon; Edge, Dawn; Buchan, Iain; Haddock, Gillian			Actissist: Proof-of-Concept Trial of a Theory-Driven Digital Intervention for Psychosis	SCHIZOPHRENIA BULLETIN			English	Article						psychosis; relapse; mHealth; digital intervention; randomized controlled trial; early psychosis	MENTAL-HEALTH INTERVENTIONS; MEDICATION ADHERENCE; EXPRESSED EMOTION; RATING-SCALE; METAANALYSIS; PEOPLE; RELIABILITY; SYMPTOMS; VALIDITY; THERAPY	Background: Timely access to intervention for psychosis is crucial yet problematic. As such, health care providers are forming digital strategies for addressing mental health challenges. A theory-driven digital intervention that monitors distressing experiences and provides real-time active management strategies could improve the speed and quality of recovery in psychosis, over and above conventi…	[Bucci, Sandra; Barrowclough, Christine; Morris, Rohan; Berry, Katherine; Lewis, Shon; Edge, Dawn; Haddock, Gillian] Univ Manchester, Manchester Acad Hlth Sci Ctr, Sch Hlth Sci, Div Psychol & Mental Hlth, Manchester, Lancs, England; [Ainsworth, John; Machin, Matthew] Univ Manchester, Div Informat Imaging & Data Sci, Manchester, Lancs, England; [Ainsworth, John; Machin, Matthew] Univ Manchester, F…	University of Manchester; University of Manchester; University of Manchester; University of Manchester; Microsoft	Bucci, S (corresponding author), Univ Manchester, Div Psychol & Mental Hlth, 2nd Floor,Zochonis Bldg,Brunswick St, Manchester M13 9PL, Lancs, England.	sandra.bucci@manchester.ac.uk	Morris, Rohan/AAA-7914-2019; Buchan, Iain E/H-5767-2013; Emsley, Richard/N-1342-2016	Buchan, Iain E/0000-0003-3392-1650; Emsley, Richard/0000-0002-1218-675X; Lewis, Shon/0000-0003-1861-4652; Ainsworth, John/0000-0002-2187-9195; Haddock, Professor Gillian/0000-0001-6234-5774; berry, katherine/0000-0002-7399-5462; Machin, Matthew/0000-0001-6600-9508	Medical Research Council Developmental Pathway Funding Scheme [MR/L005301/1]; University of Manchester; Greater Manchester Mental Health NHS Foundation Trust; Medical Research Council [MR/L005301/1] Funding Source: researchfish; MRC [MR/L005301/1, MR/P026664/1] Funding Source: UKRI	Medical Research Council Developmental Pathway Funding Scheme(UK Research & Innovation (UKRI)Medical Research Council UK (MRC)); University of Manchester; Greater Manchester Mental Health NHS Foundation Trust; Medical Research Council(UK Research & Innovation (UKRI)Medical Research Council UK (MRC)); MRC(UK Research & Innovation (UKRI)Medical Research Council UK (MRC))	The work was supported by the Medical Research Council Developmental Pathway Funding Scheme (grant number MR/L005301/1) and was supported by the University of Manchester and Greater Manchester Mental Health NHS Foundation Trust.		43	96	96	0	12	OXFORD UNIV PRESS	OXFORD	GREAT CLARENDON ST, OXFORD OX2 6DP, ENGLAND	0586-7614	1745-1701		SCHIZOPHRENIA BULL	Schizophr. Bull.	SEP	2018	44	5
J	Adner, R; Puranam, P; Zhu, F				Adner, Ron; Puranam, Phanish; Zhu, Feng			What Is Different About Digital Strategy? From Quantitative to Qualitative Change	STRATEGY SCIENCE			English	Article						digital transformation; digital technology; representation; connectivity; aggregation; firm strategy; digital strategy	ENTRY; DIVERSIFICATION; COMPETITION; RESPONSES; NETWORKS; IMPACT; VIEW	The recent attention paid to the challenge of digital transformation signals an inflection point in the impact of digital technology on the competitive landscape. We suggest that this transition can be understood as a shift from the quantitative advances that have historically characterized digital progress (e.g., Moore's law, Metcalf's law) to qualitative changes embodied in three core processes…	[Adner, Ron] Dartmouth Coll, Tuck Sch Business, Hanover, NH 03755 USA; [Puranam, Phanish] INSEAD, Strategy & Org Design, Singapore 138676, Singapore; [Zhu, Feng] Harvard Sch Business, Business Adm, Boston, MA 02163 USA	Dartmouth College; INSEAD Business School; Harvard University	Adner, R (corresponding author), Dartmouth Coll, Tuck Sch Business, Hanover, NH 03755 USA.	ron.adner@dartmouth.edu; phanish.puranam@insead.edu; fzhu@hbs.edu		Puranam, Phanish/0000-0002-0032-8538; Adner, Ron/0000-0003-1238-2248; Zhu, Feng/0000-0002-3034-6876					63	90	93	27	138	INFORMS	CATONSVILLE	5521 RESEARCH PARK DR, SUITE 200, CATONSVILLE, MD 21228 USA	2333-2050	2333-2077		STRATEG SCI	Strateg. Sci.	DEC	2019	4	4
J	Barns, S; Cosgrave, E; Acuto, M; Mcneill, D				Barns, Sarah; Cosgrave, Ellie; Acuto, Michele; Mcneill, Donald			Digital Infrastructures and Urban Governance	URBAN POLICY AND RESEARCH			English	Article						Smart cities; digital infrastructure; public sector information; regional development; broadband; urban governance; smart cities; digital strategy; open data; policy mobility	STRATEGIC CHOICE; SMART CITY; AUSTRALIA; POLITICS	The urban built environment is underpinned by an increasingly complex digital infrastructure, which is posing a variety of unpredictable and unprecedented challenges for urban governance. The paper discusses how the new hard digital infrastructures such as broadband are accompanied by the need to understand the governance of public sector information; and in turn how this relates to the emergence…	[Barns, Sarah; Mcneill, Donald] Univ Western Sydney, Inst Culture & Soc, Penrith, NSW, Australia; [Cosgrave, Ellie; Acuto, Michele] UCL, Dept Sci Technol Engn & Publ Policy, London, England	Western Sydney University; University of London; University College London	Barns, S (corresponding author), Univ Western Sydney, Inst Culture & Soc, Penrith, NSW, Australia.	s.barns@uws.edu.au		Acuto, Michele/0000-0003-4320-0531; Barns, Sarah/0000-0002-0087-7166; MCNEILL, DONALD/0000-0002-7672-6110	Urban Studies Foundation Post-doctoral Fellowship Scheme; Australian Research Council	Urban Studies Foundation Post-doctoral Fellowship Scheme; Australian Research Council(Australian Research Council)	The support of the Urban Studies Foundation Post-doctoral Fellowship Scheme (Barns) and Australian Research Council Future Fellowship scheme (McNeill) is gratefully acknowledged.		41	81	85	31	186	ROUTLEDGE JOURNALS, TAYLOR & FRANCIS LTD	ABINGDON	2-4 PARK SQUARE, MILTON PARK, ABINGDON OX14 4RN, OXON, ENGLAND	0811-1146	1476-7244		URBAN POLICY RES	Urban Policy Res.		2017	35	1
J	El Said, GR				El Said, Ghada Refaat			How Did the COVID-19 Pandemic Affect Higher Education Learning Experience? An Empirical Investigation of Learners' Academic Performance at a University in a Developing Country	ADVANCES IN HUMAN-COMPUTER INTERACTION			English	Article								COVID-19 has dramatically reshaped the way global education is delivered. Millions of learners were affected by educational institution closures due to the pandemic, which resulted in the largest online movement in the history of education. With this sudden shift away from classrooms in many parts of the globe, universities had to rapidly shift to virtual and digital strategies. Many believe that…	[El Said, Ghada Refaat] Future Univ Egypt FUE, Dept Management Informat Syst, 90th St,Fifth Settlement, New Cairo, Egypt	Egyptian Knowledge Bank (EKB); Future University in Egypt	El Said, GR (corresponding author), Future Univ Egypt FUE, Dept Management Informat Syst, 90th St,Fifth Settlement, New Cairo, Egypt.	ghada.refaat@fue.edu.eg		El Said, Ghada Refaat/0000-0001-9624-5229					24	79	79	3	23	HINDAWI LTD	LONDON	ADAM HOUSE, 3RD FLR, 1 FITZROY SQ, LONDON, W1T 5HF, ENGLAND	1687-5893	1687-5907		ADV HUM-COMPUT INTER	Adv. Hum-Comput. Interact.	FEB 10	2021	2021
J	Li, LX				Li, Lixu			Digital transformation and sustainable performance: The moderating role of market turbulence	INDUSTRIAL MARKETING MANAGEMENT			English	Article						Digital transformation; Market turbulence; Economic performance; Environmental performance; China	BIG DATA ANALYTICS; DYNAMIC CAPABILITIES; FIRM PERFORMANCE; SUPPLY CHAIN; RESOURCE; STRATEGY; SERVICE; PRODUCT; IMPACT; END	As digital technologies disrupt one sector after another, many companies are actively embracing digital transformation. However, the relationship between digital transformation and sustainable performance remains unclear. To fill this gap, based on an integrated perspective of dynamic capability and organizational inertia, this study examines the curvilinear relationships between digital transfor…	[Li, Lixu] Xian Univ Technol, Sch Econ & Management, Xian 710054, Peoples R China	Xi'an University of Technology	Li, LX (corresponding author), Xian Univ Technol, Sch Econ & Management, Xian 710054, Peoples R China.	li.lixu@foxmail.com		Li, Lixu/0000-0002-1927-0604					74	74	74	341	905	ELSEVIER SCIENCE INC	NEW YORK	STE 800, 230 PARK AVE, NEW YORK, NY 10169 USA	0019-8501	1873-2062		IND MARKET MANAG	Ind. Mark. Manage.	JUL	2022	104
J	Rumsfeld, JS; Brooks, SC; Aufderheide, TP; Leary, M; Bradley, SM; Nkonde-Price, C; Schwamm, LH; Jessup, M; Ferrer, JME; Merchant, RM				Rumsfeld, John S.; Brooks, Steven C.; Aufderheide, Tom P.; Leary, Marion; Bradley, Steven M.; Nkonde-Price, Chileshe; Schwamm, Lee H.; Jessup, Mariell; Ferrer, Jose Maria E.; Merchant, Raina M.		Amer Heart Assoc Emergency Cardiov; Council Cardiopulm Critical Care P; Council Quality Care Outcomes Res; Council Cardiovasc Stroke Nursing; Council Epidemiology Prevention	Use of Mobile Devices, Social Media, and Crowdsourcing as Digital Strategies to Improve Emergency Cardiovascular Care A Scientific Statement From the American Heart Association	CIRCULATION			English	Article						AHA Scientific Statements; cardiac arrest; crowdsourcing; emergency cardiovascular care; heart attack; mhealth; mobile health; myocardial infarction; social media; stroke	ACUTE MYOCARDIAL-INFARCTION; AUTOMATED EXTERNAL DEFIBRILLATORS; ASSISTED CARDIOPULMONARY-RESUSCITATION; TISSUE-PLASMINOGEN ACTIVATOR; CARDIAC-ARREST; COMMUNITY CONSULTATION; LAY RESCUERS; ACUTE STROKE; PUBLIC DISCLOSURE; DATA-COLLECTION						Brooks, Steven/ABC-8078-2021; Bradley, Steven/AID-7839-2022; Brooks, Steven/N-4317-2015	Brooks, Steven/0000-0002-4592-4974; Jessup, Mariell/0000-0002-3010-0112; Leary, Marion/0000-0002-4815-4223					147	72	74	0	32	LIPPINCOTT WILLIAMS & WILKINS	PHILADELPHIA	TWO COMMERCE SQ, 2001 MARKET ST, PHILADELPHIA, PA 19103 USA	0009-7322	1524-4539		CIRCULATION	Circulation	AUG 23	2016	134	8
J	AlNuaimi, BK; Singh, SK; Ren, S; Budhwar, P; Vorobyev, D				AlNuaimi, Bader K.; Singh, Sanjay Kumar; Ren, Shuang; Budhwar, Pawan; Vorobyev, Dmitriy			Mastering digital transformation: The nexus between leadership, agility, and digital strategy	JOURNAL OF BUSINESS RESEARCH			English	Article						Digital transformation; Organizational agility; Leadership; Digital strategy; Institutional theory; COVID-19	SUPPLY CHAIN AGILITY; ORGANIZATIONAL AGILITY; INSTITUTIONAL THEORY; MANUFACTURING PERFORMANCE; INNOVATION CAPABILITY; DYNAMIC CAPABILITIES; GREEN PROCUREMENT; PLS-SEM; BUSINESS; PERSPECTIVE	Drawing upon new institutional theory, we developed and tested a model on how digital transformational leadership and organizational agility influence digital transformation with digital strategy as a moderator. We found that digital transformational leadership and organizational agility positively influence digital transformation, and digital transformational leadership influences organizational…	[AlNuaimi, Bader K.] Abu Dhabi Univ, Coll Business, Abu Dhabi, U Arab Emirates; [Singh, Sanjay Kumar] Maynooth Univ, Sch Business, Maynooth, Ireland; [Ren, Shuang] Deakin Business Sch, Melbourne, Australia; [Budhwar, Pawan] Aston Business Sch, Birmingham, England; [Vorobyev, Dmitriy] PRIGO Univ, Havirov, Czech Republic	Abu Dhabi University; Deakin University; Aston University; PRIGO University	Singh, SK (corresponding author), Maynooth Univ, Sch Business, Maynooth, Ireland.	1063826@students.adu.ac.ae; sanjay.singh@mu.ie; shuang.ren@deakin.edu.au; p.s.budhwar@aston.ac.uk; dmitriy.vorobyev@prigo.cz	SINGH, SANJAY KUMAR/M-8813-2013; Singh, Srishti/JCO-3741-2023; Singh, Sanjay Prithviraj/IQV-1492-2023; Vorobyev, Dmitriy/A-6975-2018	SINGH, SANJAY KUMAR/0000-0001-7651-5009; Singh, Sanjay Prithviraj/0000-0001-5043-8762; Vorobyev, Dmitriy/0000-0002-2230-182X; Ren, Shuang/0000-0002-8768-8447					157	70	71	692	1522	ELSEVIER SCIENCE INC	NEW YORK	STE 800, 230 PARK AVE, NEW YORK, NY 10169 USA	0148-2963	1873-7978		J BUS RES	J. Bus. Res.	JUN	2022	145
J	Barns, S				Barns, Sarah			Mine your data: open data, digital strategies and entrepreneurial governance by code	URBAN GEOGRAPHY			English	Article						Smart cities; open data; urban entrepreneurialism; policy mobility	CITIES; GEOGRAPHIES; POLICY	Investment in the release of open data has become increasingly central to the implementation of smart city programs by governments around the world. Though originally arising out of a push towards open government and the pursuit of more transparent decision-making by public authorities at multiple scales, open data programs have more recently been adopted by municipal governments to support entre…	[Barns, Sarah] Univ Western Sydney, Inst Culture & Soc, Bldg EM,Parramatta Campus,Locked Bag 1797, Penrith, NSW 2751, Australia	Western Sydney University	Barns, S (corresponding author), Univ Western Sydney, Inst Culture & Soc, Bldg EM,Parramatta Campus,Locked Bag 1797, Penrith, NSW 2751, Australia.	s.barns@westernsydney.edu.au		Barns, Sarah/0000-0002-0087-7166	Urban Studies Foundation Postdoctoral Research Fellowship Programme	Urban Studies Foundation Postdoctoral Research Fellowship Programme	This research was supported by the Urban Studies Foundation Postdoctoral Research Fellowship Programme.		70	69	71	2	77	ROUTLEDGE JOURNALS, TAYLOR & FRANCIS LTD	ABINGDON	2-4 PARK SQUARE, MILTON PARK, ABINGDON OX14 4RN, OXON, ENGLAND	0272-3638	1938-2847		URBAN GEOGR	Urban Geogr.		2016	37	4
J	Manita, R; Elommal, N; Baudier, P; Hikkerova, L				Manita, Riadh; Elommal, Najoua; Baudier, Patricia; Hikkerova, Lubica			The digital transformation of external audit and its impact on corporate governance	TECHNOLOGICAL FORECASTING AND SOCIAL CHANGE			English	Article						Audit; Digitalization; Big Data; Artificial Intelligence; Audit process	BIG DATA; ARTIFICIAL-INTELLIGENCE; INNOVATION; QUALITY	The literature demonstrates the growing interest of digitalization in organizations. The purpose of this paper is to study the influence of digitalization on audit's business and to understand how it can improve the role of audit as a governance mechanism. A qualitative approach was conducted by interviewing auditors from the five largest auditing firms in France. This paper demonstrates that dig…	[Manita, Riadh] NEOMA Business Sch, 1 Rue Marechal Juin, F-76130 Mont St Aignan, France; [Elommal, Najoua] Ecole Management Leonard de Vinci, 12 Ave Leonard de Vinci, F-92916 Paris, France; [Baudier, Patricia] EM Normandie, 64 Rue Ranelagh, F-75016 Paris, France; [Hikkerova, Lubica] IPAG Business Sch, 184 Blvd St Germain, F-75006 Paris, France	NEOMA Business School; IPAG Business School	Hikkerova, L (corresponding author), IPAG Business Sch, 184 Blvd St Germain, F-75006 Paris, France.	Riadh.manita@neoma-bs.fr; najoua.elommal_manita@devinci.fr; pbaudier@em-normandie.fr; lubicahikkerova@gmail.com		BAUDIER, PATRICIA/0000-0001-9881-4560					64	68	71	37	121	ELSEVIER SCIENCE INC	NEW YORK	STE 800, 230 PARK AVE, NEW YORK, NY 10169 USA	0040-1625	1873-5509		TECHNOL FORECAST SOC	Technol. Forecast. Soc. Chang.	JAN	2020	150
J	Ukko, J; Nasiri, M; Saunila, M; Rantala, T				Ukko, Juhani; Nasiri, Mina; Saunila, Minna; Rantala, Tero			Sustainability strategy as a moderator in the relationship between digital business strategy and financial performance	JOURNAL OF CLEANER PRODUCTION			English	Article						Sustainable development; Sustainability strategy; Digital strategy; Digital transformation; Technology transformation; Managerial capabilities; Financial performance	SINGLE-ITEM MEASURES; CORPORATE SUSTAINABILITY; E-COMMERCE; PREDICTIVE-VALIDITY; FIRM PERFORMANCE; CAPABILITIES; INNOVATION; TRANSFORMATION; SERVICE; MANAGEMENT	This paper empirically examines the role of a sustainability strategy in the relation between a digital business strategy and financial performance. By classifying two capabilities (managerial capability and operational capability) that are needed to realize a digital business strategy, this study suggests that a sustainability strategy serves as a promoter in the relation between managerial capa…	[Ukko, Juhani; Nasiri, Mina; Saunila, Minna; Rantala, Tero] LUT Univ, Sch Engn Sci, Dept Ind Engn & Management, Saimaankatu 11, FI-15140 Lahti, Finland		Ukko, J (corresponding author), LUT Univ, Sch Engn Sci, Dept Ind Engn & Management, Saimaankatu 11, FI-15140 Lahti, Finland.	juhani.ukko@lut.fi; mina.nasiri@lut.fi; minna.saunila@lut.fi; tero.rantala@lut.fi	Rantala, Tero/T-4440-2019	Rantala, Tero/0000-0001-6451-5546; Nasiri, Mina/0000-0003-2353-7487					73	68	69	28	195	ELSEVIER SCI LTD	OXFORD	THE BOULEVARD, LANGFORD LANE, KIDLINGTON, OXFORD OX5 1GB, OXON, ENGLAND	0959-6526	1879-1786		J CLEAN PROD	J. Clean Prod.	NOV 1	2019	236
J	Kohli, R; Johnson, S				Kohli, Rajiv; Johnson, Shawn			DIGITAL TRANSFORMATION IN LATECOMER INDUSTRIES: CIO AND CEO LEADERSHIP LESSONS FROM ENCANA OIL & GAS (USA) INC.	MIS QUARTERLY EXECUTIVE			English	Article								Unlike digitally savvy banking and retail industries, oil and natural gas businesses are latecomers to digitization. With large capital investments in complex industrial operations, firms in latecomer industries are seeking ways to cut costs and become responsive to market demands. Executives in oil and natural gas companies are facing unprecedented pressure to cut costs due to market turbulence …	[Kohli, Rajiv] Coll William & Mary, Williamsburg, VA 23187 USA	William & Mary	Kohli, R (corresponding author), Coll William & Mary, Williamsburg, VA 23187 USA.	rajiv.kohli@mason.wm.edu; shawn.johnson@encana.com							15	66	66	9	195	INDIANA UNIV, OPER & DECISION TECHNOL DEPT	BLOOMINGTON	KELLEY SCH BUS, E 10 ST, BLOOMINGTON, IN 47405-1701 USA	1540-1960			MIS Q EXEC	MIS Q. Exec.	DEC	2011	10	4
J	Matthyssens, P				Matthyssens, Paul			Reconceptualizing value innovation for Industry 4.0 and the Industrial Internet of Things	JOURNAL OF BUSINESS & INDUSTRIAL MARKETING			English	Article						Value innovation; IoT; Industry 4.0; Strategy innovation	DELIBERATE LEARNING-MECHANISMS; BUSINESS MODEL; NETWORK; SERVITIZATION; CAPABILITIES; PERSPECTIVE; COMPANIES; GROWTH	Purpose - Starting from the foundations of value innovation, this paper aims to give an idea of the key drivers and barriers - internal and external to the company - and to provide insight into proven capabilities underscoring the ability to create a flow of new value initiatives. These thoughts are then confronted with the present challenges of Industry 4.0 and the Industrial Internet of Things …	[Matthyssens, Paul] Univ Antwerp, Antwerp Management Sch, Dept Management, Antwerp, Belgium	University of Antwerp	Matthyssens, P (corresponding author), Univ Antwerp, Antwerp Management Sch, Dept Management, Antwerp, Belgium.	paul.matthyssens@ams.ac.be		Matthyssens, Paul/0000-0002-9138-7911					46	64	64	7	102	EMERALD GROUP PUBLISHING LTD	BINGLEY	HOWARD HOUSE, WAGON LANE, BINGLEY BD16 1WA, W YORKSHIRE, ENGLAND	0885-8624	2052-1189		J BUS IND MARK	J. Bus. Ind. Mark.		2019	34	6
J	Hornuf, L; Klus, MF; Lohwasser, TS; Schwienbacher, A				Hornuf, Lars; Klus, Milan F.; Lohwasser, Todor S.; Schwienbacher, Armin			How do banks interact with fintech startups?	SMALL BUSINESS ECONOMICS			English	Article						Fintech; Strategic alliance; Make; buy; or ally; Entrepreneurial finance; Banks	STRATEGIC ALLIANCES; FINANCIAL INNOVATION; DIGITAL INNOVATION; SERVICE; SERVITIZATION; DIGITIZATION; PERFORMANCE; BENEFITS; SCIENCE; BUY	The increasing pervasiveness of technology-driven firms that offer financial services has led to growing pressure on traditional banks to modernize their core business activities and services. Many banks tackle the challenges of digitalization by cooperating with startup firms that offer technology-driven financial services and novel service packages (fintechs). In this article, we examine which …	[Hornuf, Lars] Univ Bremen, Bremen, Germany; [Hornuf, Lars] Max Planck Inst Innovat & Competit, Munich, Germany; [Hornuf, Lars] CESifo, Munich, Germany; [Klus, Milan F.; Lohwasser, Todor S.] Univ Munster, Munster, Germany; [Schwienbacher, Armin] Univ Cote dAzur, SKEMA Business Sch, Euralille, France	University of Bremen; Ifo Institut; University of Munster; SKEMA Business School; Universite Cote d'Azur	Hornuf, L (corresponding author), Univ Bremen, Bremen, Germany.	hornuf@uni-bremen.de	Hornuf, Lars/AAF-7986-2020	Hornuf, Lars/0000-0002-0576-7759	Projekt DEAL	Projekt DEAL	Open Access funding provided by Projekt DEAL.		52	63	64	24	165	SPRINGER	DORDRECHT	VAN GODEWIJCKSTRAAT 30, 3311 GZ DORDRECHT, NETHERLANDS	0921-898X	1573-0913		SMALL BUS ECON	Small Bus. Econ. Group	OCT	2021	57	3
J	Porfírio, JA; Carrilho, T; Felício, JA; Jardim, J				Porfirio, Jose Antonio; Carrilho, Tiago; Felicio, Jose Augusto; Jardim, Jacinto			Leadership characteristics and digital transformation	JOURNAL OF BUSINESS RESEARCH			English	Article						Leadership; Digital transformation; Corporate strategy; Business strategy; Digital strategy	INFORMATION-TECHNOLOGY; CORPORATE-STRATEGY; CAPABILITY; OPTIONS; CONTEXT	Digital transformation (DT) is essential for all companies and industries, depending crucially on systems, IT, strategy, and people. In this research, we analyse how firms' characteristics, associated with management characteristics, promote DT in Portuguese companies. The model considers the relationship between digital strategy and corporate and business strategy, according to firm and manageme…	[Porfirio, Jose Antonio; Carrilho, Tiago] Univ Aberta, Social Sci & Management Dept, Lisbon, Portugal; [Felicio, Jose Augusto] ISEG Lisbon Sch Econ & Management, Lisbon, Portugal; [Jardim, Jacinto] Univ Aberta, Catedra Infante D Henrique Estudos Insulares, Lisbon, Portugal	Universidade Aberta; Universidade Aberta	Porfírio, JA (corresponding author), Univ Aberta, Social Sci & Management Dept, Lisbon, Portugal.	Jose.Porfirio@uab.pt; Tiago.Mendes@uab.pt; jaufeli@netcabo.pt; Jacinto.Jardiim@uab.pt	Jardim, Jacinto/AAH-9791-2020; Porfírio, José A/I-3940-2012	Jardim, Jacinto/0000-0002-0600-3128; Porfírio, José A/0000-0001-9551-9531; Carrilho, Tiago/0000-0001-8258-8546; FELICIO, J. AUGUSTO/0000-0001-5862-1094	FCT - Fundacao para a Ciencia e Tecnologia (Portugal) [UIDB/04521/2020]	FCT - Fundacao para a Ciencia e Tecnologia (Portugal)(Fundacao para a Ciencia e a Tecnologia (FCT))	We gratefully acknowledge: financial support from FCT - Fundacao para a Ciencia e Tecnologia (Portugal); national funding through research grant UIDB/04521/2020.		50	60	62	100	587	ELSEVIER SCIENCE INC	NEW YORK	STE 800, 230 PARK AVE, NEW YORK, NY 10169 USA	0148-2963	1873-7978		J BUS RES	J. Bus. Res.	JAN	2021	124
S	Dameri, RP		Dameri, RP; RosenthalSabroux, C		Dameri, Renata Paola			Comparing Smart and Digital City: Initiatives and Strategies in Amsterdam and Genoa. Are They Digital and/or Smart?	SMART CITY: HOW TO CREATE PUBLIC AND ECONOMIC VALUE WITH HIGH TECHNOLOGY IN URBAN SPACE	Progress in IS		English	Article; Book Chapter						Smart city; Digital city; Digital agenda; Case study	SYSTEMS	The objective of this research is to investigate the relations between Smart city and Digital city concepts and strategies. The author examines the international literature about these topics, comparing smart city and digital city definitions, components and goals. This survey shows that a clear definition of both smart city and digital city still lacks and that these two topics are often overlap…	Univ Genoa, Dept Econ, Genoa, Italy	University of Genoa	Dameri, RP (corresponding author), Univ Genoa, Dept Econ, Genoa, Italy.	dameri@economia.unige.it	DAMERI, RENATA/AAD-6635-2021						33	60	60	4	31	SPRINGER-VERLAG BERLIN	BERLIN	HEIDELBERGER PLATZ 3, D-14197 BERLIN, GERMANY	2196-8705	2196-8713	978-3-319-06160-3; 978-3-319-06159-7	PROGR IS			2014
J	Dutta, G; Kumar, R; Sindhwani, R; Singh, RK				Dutta, Gautam; Kumar, Ravinder; Sindhwani, Rahul; Singh, Rajesh Kumar			Digital transformation priorities of India's discrete manufacturing SMEs - a conceptual study in perspective of Industry 4.0	COMPETITIVENESS REVIEW			English	Article						Integration; SME; Manufacturing; Industry 4; 0; Digitalization; IoT; Digital; Transformation; Performance; Design	BIG DATA; MODELS	Purpose Manufacturing excellence is critical to our nation's economy. Indian Government's National Manufacturing Policy, drafted in 2011, is being revamped to include the aspects of Industry 4.0. Initiatives, both led and assisted by government and industries, are being launched to catalyze and transform India's manufacturing competencies. This paper aims to study the functional areas which can p…	[Dutta, Gautam; Kumar, Ravinder; Sindhwani, Rahul] Amity Univ, Dept Mech Engn, Noida, India; [Singh, Rajesh Kumar] Management Dev Inst, Dept Operat Res, Gurgaon, India	Amity University Noida; Management Development Institute (MDI)	Dutta, G (corresponding author), Amity Univ, Dept Mech Engn, Noida, India.	dutta.gautam4@gmail.com; rkumar19@amity.edu; rsindhwani@amity.edu; rajesh.singh@mdi.ac.in	Sindhwani, Dr. Rahul/AAO-8022-2020	Sindhwani, Dr. Rahul/0000-0001-9361-309X; Dutta, Gautam/0000-0003-2981-6073; Kumar, Prof. (Dr.) Ravinder/0000-0003-4255-4303					47	59	60	6	142	EMERALD GROUP PUBLISHING LTD	BINGLEY	HOWARD HOUSE, WAGON LANE, BINGLEY BD16 1WA, W YORKSHIRE, ENGLAND	1059-5422	2051-3143		COMPET REV	Compet. Rev.	JAN 13	2020	30	3
J	Vieira, VA; de Almeida, MIS; Agnihotri, R; da Silva, NSDC; Arunachalam, S				Vieira, Valter Afonso; Severo de Almeida, Marcos Inacio; Agnihotri, Raj; De Arruda Correa da Silva, Noga Simoes; Arunachalam, S.			In pursuit of an effective B2B digital marketing strategy in an emerging market	JOURNAL OF THE ACADEMY OF MARKETING SCIENCE			English	Article						Digital echoverse; Digital B2B; Digital media elasticities; Emerging markets; Vector autoregression; Inbound marketing; Paid media; Owned media; Earned social media; Sales; Customer acquisition	WORD-OF-MOUTH; USER-GENERATED CONTENT; SOCIAL MEDIA; UNIT-ROOT; TIME-SERIES; SALES; FUTURE; ONLINE; MODEL; STATIONARITY	In business markets, firms operating in developing economies deal with burgeoning use of the internet, new electronic purchase methods, and a wide range of social media and online sales platforms. However, marketers are unclear about the pattern of influence of firm-initiated (i.e., paid media, owned media, and digital inbound marketing) and market-initiated (i.e., earned social media and organic…	[Vieira, Valter Afonso; De Arruda Correa da Silva, Noga Simoes] Maringa State Univ PPA UEM, Coll Business Adm, Av Colombo 5-790, BR-87053070 Maringa, Parana, Brazil; [Severo de Almeida, Marcos Inacio] Univ Fed Goias, Fac Business Adm Accounting Sci & Econ Sci FACE, R Samambaia S-N,Campus Samambaia, BR-74001970 Goiania, Go, Brazil; [Agnihotri, Raj] Iowa State Univ, Ivy Coll Business, Ames, IA USA;…	Universidade Federal de Goias; Iowa State University; Indian School of Business (ISB)	Vieira, VA (corresponding author), Maringa State Univ PPA UEM, Coll Business Adm, Av Colombo 5-790, BR-87053070 Maringa, Parana, Brazil.	valterafonsovieira@gmail.com; misevero@yahoo.com.br; raj2@iastate.edu; noga.simoes@gmail.com; S_Arunachalam@isb.edu	Vieira, Valter/AAN-1888-2020; de Almeida, Marcos I.S./D-9239-2018; Agnihotri, Raj/AAN-9991-2021; S, Arunachalam/F-9249-2015	de Almeida, Marcos I.S./0000-0001-9493-0644; S, Arunachalam/0000-0003-4110-9531; Agnihotri, Raj/0000-0002-2008-5908					89	57	58	20	193	SPRINGER	NEW YORK	ONE NEW YORK PLAZA, SUITE 4600, NEW YORK, NY, UNITED STATES	0092-0703	1552-7824		J ACAD MARKET SCI	J. Acad. Mark. Sci.	NOV	2019	47	6
J	Brinch, M; Stentoft, J; Jensen, JK; Rajkumar, C				Brinch, Morten; Stentoft, Jan; Jensen, Jesper Kronborg; Rajkumar, Christopher			Practitioners understanding of big data and its applications in supply chain management	INTERNATIONAL JOURNAL OF LOGISTICS MANAGEMENT			English	Article						Supply chain management; Big data; Decision making; Information technology; Mixed method; Business processes; Digital strategy; Applications	DECISION-SUPPORT-SYSTEMS; DATA ANALYTICS; PREDICTIVE ANALYTICS; BUSINESS ANALYTICS; DELPHI METHOD; DATA SCIENCE; OPERATIONS; INFORMATION; PERFORMANCE; FRAMEWORK	Purpose Big data poses as a valuable opportunity to further improve decision making in supply chain management (SCM). However, the understanding and application of big data seem rather elusive and only partially explored. The purpose of this paper is to create further guidance in understanding big data and to explore applications from a business process perspective. Design/methodology/approach Th…	[Brinch, Morten; Stentoft, Jan; Rajkumar, Christopher] Univ Southern Denmark, Dept Entrepreneurship & Relationship Management, Kolding, Denmark; [Jensen, Jesper Kronborg] Energinet Dk, Dept Market Anal & Design, Fredericia, Denmark	University of Southern Denmark	Brinch, M (corresponding author), Univ Southern Denmark, Dept Entrepreneurship & Relationship Management, Kolding, Denmark.	mobr@sam.sdu.dk	Brinch, Morten/H-2333-2017	Brinch, Morten/0000-0001-9497-9966					78	56	57	7	101	EMERALD GROUP PUBLISHING LTD	BINGLEY	HOWARD HOUSE, WAGON LANE, BINGLEY BD16 1WA, W YORKSHIRE, ENGLAND	0957-4093	1758-6550		INT J LOGIST MANAG	Int. J. Logist. Manag.		2018	29	2
J	Peter, MK; Kraft, C; Lindeque, J				Peter, Marc K.; Kraft, Corin; Lindeque, Johan			Strategic action fields of digital transformation An exploration of the strategic action fields of Swiss SMEs and large enterprises	JOURNAL OF STRATEGY AND MANAGEMENT			English	Article						Business strategy; Digital transformation; Digitalization; Digital strategy; Digital business development; Strategic action fields	MATURITY; CAPABILITIES; TECHNOLOGY; CHALLENGES; READINESS; MODEL	Purpose The purpose of this paper is to capture the collective understanding of digital transformation (DT) across Swiss businesses and establish a reference framework based on the strategic action field (SAF) theory. Design/methodology/approach A number of Swiss associations provided their databases for an online survey. The large sample includes 2,590 participants from 1,854 organisations and d…	[Peter, Marc K.; Kraft, Corin; Lindeque, Johan] Univ Appl Sci & Arts Northwestern Switzerland FHN, Sch Business, Olten, Switzerland	FHNW University of Applied Sciences & Arts Northwestern Switzerland	Peter, MK (corresponding author), Univ Appl Sci & Arts Northwestern Switzerland FHN, Sch Business, Olten, Switzerland.	marc.peter@fhnw.ch; corin.kraft@fhnw.ch; Johan.Lindeque@fhnw.ch	Lindeque, Johan P/G-5211-2013	Lindeque, Johan P/0000-0002-8303-2715; Peter, Marc/0000-0002-2897-0389					84	55	56	7	102	EMERALD GROUP PUBLISHING LTD	BINGLEY	HOWARD HOUSE, WAGON LANE, BINGLEY BD16 1WA, W YORKSHIRE, ENGLAND	1755-425X			J STRATEGY MANAG	J. Strategy Manag.	FEB 17	2020	13	1
J	Piskorski, MJ				Piskorski, Mikolaj Jan			Social Strategies That Work	HARVARD BUSINESS REVIEW			English	Article								Although most companies have collected lots of friends and followers on social platforms such as Facebook, few have succeeded in generating profits there. That's because they merely port their digital strategies into social environments by broadcasting their commercial messages or seeking customer feedback. To succeed on social platforms, says Harvard Business School's Piskorski, businesses need …	Harvard Univ, Sch Business, Strategy Unit, Cambridge, MA 02138 USA	Harvard University	Piskorski, MJ (corresponding author), Harvard Univ, Sch Business, Strategy Unit, Cambridge, MA 02138 USA.			Bernard, Jean-Luc/0009-0001-4768-7108					0	55	58	0	48	HARVARD BUSINESS SCHOOL PUBLISHING CORPORATION	WATERTOWN	300 NORTH BEACON STREET, WATERTOWN, MA 02472 USA	0017-8012			HARVARD BUS REV	Harv. Bus. Rev.	NOV	2011	89	11
J	Ross, JW; Sebastian, IM; Beath, CM				Ross, Jeanne W.; Sebastian, Ina M.; Beath, Cynthia M.			How to Develop a Great Digital Strategy	MIT SLOAN MANAGEMENT REVIEW			English	Article									[Ross, Jeanne W.; Sebastian, Ina M.] MIT, Ctr Informat Syst Res, Cambridge, MA 02139 USA; [Beath, Cynthia M.] Univ Texas Austin, McCombs Sch Business, Austin, TX 78712 USA	Massachusetts Institute of Technology (MIT); University of Texas System; University of Texas Austin	Ross, JW (corresponding author), MIT, Ctr Informat Syst Res, Cambridge, MA 02139 USA.	smrfeedback@mit.edu	Reinert, Leon/ADP-6076-2022						0	52	52	3	122	SLOAN MANAGEMENT REVIEW ASSOC, MIT SLOAN SCHOOL MANAGEMENT	CAMBRIDGE	77 MASSACHUSETTS AVE, E60-100, CAMBRIDGE, MA 02139-4307 USA	1532-9194			MIT SLOAN MANAGE REV	MIT Sloan Manage. Rev.	WIN	2017	58	2
J	Ritala, P; Baiyere, A; Hughes, M; Kraus, S				Ritala, Paavo; Baiyere, Abayomi; Hughes, Mathew; Kraus, Sascha			Digital strategy implementation: The role of individual entrepreneurial orientation and relational capital	TECHNOLOGICAL FORECASTING AND SOCIAL CHANGE			English	Article						Digital strategy; Individual entrepreneurial orientation; Proactiveness; Risk-taking; Innovativeness; Relational capital; Performance	DESIGN SCIENCE RESEARCH; INFORMATION-SYSTEMS; CORPORATE ENTREPRENEURSHIP; DYNAMIC CAPABILITIES; FIRM PERFORMANCE; USER ACCEPTANCE; KNOWLEDGE; TECHNOLOGY; WORK; INNOVATION	In transformational strategy contexts such as digitalization, the entrepreneurial behavior of the firm's employees is crucial. This study examines the role of employees' individual-level entrepreneurial orientation (IEO) in terms of proactiveness, risk-taking, and innovativeness, and their relational capital within the organization, on their performance in achieving organizations' digital strateg…	[Ritala, Paavo] LUT Univ, Sch Business & Management, Lappeenranta, Finland; [Baiyere, Abayomi] Copenhagen Business Sch, Dept Digitalizat, Copenhagen, Denmark; [Baiyere, Abayomi] Univ Turku, Informat Syst Sci, Turku, Finland; [Hughes, Mathew] Loughborough Univ, Sch Business & Econ, Loughborough LE11 3TU, Leics, England; [Kraus, Sascha] Free Univ Bozen Bolzano, Fac Econ & Management, Piazza Univ 1,…	Lappeenranta-Lahti University of Technology LUT; Copenhagen Business School; University of Turku; Loughborough University; Free University of Bozen-Bolzano	Ritala, P (corresponding author), LUT Univ, Sch Business & Management, Lappeenranta, Finland.	ritala@lut.fi; aba.digi@cbs.dk; m.hughes2@lboro.ac.uk; sascha.kraus@zfke.de		Ritala, Paavo/0000-0002-8525-4610; Hughes, Mathew/0000-0001-6859-558X	PoDoCo - Post Docs in Companies	PoDoCo - Post Docs in Companies	We want to thank PoDoCo -Post Docs in Companies -for financial support regarding this research. We also want to thank Hannu Salmela, Matti Mantymaki, and Milla Wirren for their support.		146	49	49	41	254	ELSEVIER SCIENCE INC	NEW YORK	STE 800, 230 PARK AVE, NEW YORK, NY 10169 USA	0040-1625	1873-5509		TECHNOL FORECAST SOC	Technol. Forecast. Soc. Chang.	OCT	2021	171
J	Chester, J; Montgomery, KC				Chester, Jeff; Montgomery, Kathryn C.			The role of digital marketing in political campaigns	INTERNET POLICY REVIEW			English	Article						Elections; Advertising; Privacy; Analytics; Profiling	LAW	Computational politics-the application of digital targeted-marketing technologies to election campaigns in the US and elsewhere-are now raising the same concerns for democratic discourse and governance that they have long raised for consumer privacy and welfare in the commercial marketplace. This paper examines the digital strategies and technologies of today's political operations, explaining ho…	[Chester, Jeff] Ctr Digital Democracy, Washington, DC 20006 USA; [Montgomery, Kathryn C.] Amer Univ, Sch Commun, Washington, DC 20016 USA	American University	Chester, J (corresponding author), Ctr Digital Democracy, Washington, DC 20006 USA.								97	47	48	1	26	ALEXANDER VON HUMBOLDT INST INTERNET & SOC	BERLIN	OBERWALLSTRASSE 9, BERLIN, 10117, GERMANY	2197-6775			INTERNET POLICY REV	Internet Policy Rev.	DEC	2017	6	4
J	Xie, XM; Han, YH; Anderson, A; Ribeiro-Navarrete, S				Xie, Xuemei; Han, Yuhang; Anderson, Alistair; Ribeiro-Navarrete, Samuel			Digital platforms and SMEs' business model innovation: Exploring the mediating mechanisms of capability reconfiguration	INTERNATIONAL JOURNAL OF INFORMATION MANAGEMENT			English	Article						Digital platforms; Business model innovation; Capability reconfiguration; Dynamic capability; SMEs	INDUSTRY 4.0; DYNAMIC CAPABILITIES; PERFORMANCE; EVOLUTION; STRATEGY; ROLES; TRANSFORMATION; COLLABORATION; TECHNOLOGIES; INVOLVEMENT	In our digital era, many small and medium-sized enterprises (SMEs) face the challenge of relying on digital platforms to enhance their business model innovation. Prior research on this subject has mainly focused on the interaction between SMEs and their partners through their use of digital platforms. Meanwhile, how SMEs reconfigure their capabilities to promote business model innovation by adopt…	[Xie, Xuemei; Han, Yuhang] Tongji Univ, Sch Econ & Management, Shanghai 200092, Peoples R China; [Anderson, Alistair] Lancaster Univ Management Sch, Lancaster, England; [Ribeiro-Navarrete, Samuel] ES Business & Mkt Sch, Madrid, Spain	Tongji University	Han, YH (corresponding author), Tongji Univ, Sch Econ & Management, Shanghai 200092, Peoples R China.	hanyuhang@tongji.edu.cn	Ribeiro-Navarrete, Samuel/GXW-2229-2022; Xie, X.M./ABQ-6831-2022; Han, Yuhang/HGB-0213-2022; Ribeiro-Navarrete, Samuel/CAG-7783-2022	HAN, Yuhang/0000-0002-7688-619X; Ribeiro-Navarrete, Samuel/0000-0003-1046-5322	National Natural Science Foundation of China [71922016, 71772118]; Major Project of National Social Science Fund of China [20ZD059]; Fundamental Research Funds for the Central Universities [22120220119]	National Natural Science Foundation of China(National Natural Science Foundation of China (NSFC)); Major Project of National Social Science Fund of China; Fundamental Research Funds for the Central Universities(Fundamental Research Funds for the Central Universities)	This research was supported by the National Natural Science Foundation of China (Grant number: 71922016; 71772118) , Major Project of National Social Science Fund of China (Grant number: 20&ZD059) , and the Fundamental Research Funds for the Central Universities (Grant number: 22120220119) .		107	38	38	187	605	ELSEVIER SCI LTD	OXFORD	THE BOULEVARD, LANGFORD LANE, KIDLINGTON, OXFORD OX5 1GB, OXON, ENGLAND	0268-4012	1873-4707		INT J INFORM MANAGE	Int. J. Inf. Manage.	AUG	2022	65
J	Proksch, D; Rosin, AF; Stubner, S; Pinkwart, A				Proksch, Dorian; Rosin, Anna Frieda; Stubner, Stephan; Pinkwart, Andreas			The influence of a digital strategy on the digitalization of new ventures: The mediating effect of digital capabilities and a digital culture	JOURNAL OF SMALL BUSINESS MANAGEMENT			English	Article; Early Access						Digital entrepreneurship; digital new ventures; digital strategy		A higher degree of digitalization in new ventures' product/service offerings and their processes can lead to a faster time to market and the ability to rapidly scale. Hence, it has the possibility to significantly impact the performance. To increase the degree of digitalization in new ventures, they can implement a digital strategy. Currently there is no evidence if this measure has a strong impa…	[Proksch, Dorian; Pinkwart, Andreas] HHL Leipzig Grad Sch Management, Stiftungsfond Deutsch Bank Chair Innovat Manageme, Leipzig, Germany; [Proksch, Dorian] Univ Twente, Fac Behav Management & Social Studies, Res Grp Entrepreneurship & Technol Management ETM, Enschede, Netherlands; [Rosin, Anna Frieda; Stubner, Stephan] HHL Leipzig Grad Sch Management, Porsche Chair Strateg Management & Digital E…	HHL Leipzig Graduate School of Management; University of Twente; HHL Leipzig Graduate School of Management	Proksch, D (corresponding author), Fac Behav Management & Social Studies, RA2109,POB 217, NL-7500 AE Enschede, Netherlands.	d.e.proksch@utwente.nl		Proksch, Dorian/0000-0002-8252-3248					110	38	39	53	394	TAYLOR & FRANCIS INC	PHILADELPHIA	530 WALNUT STREET, STE 850, PHILADELPHIA, PA 19106 USA	0047-2778	1540-627X		J SMALL BUS MANAGE	J. Small Bus. Manag.	2021 MAR 18	2021
J	Straker, K; Wrigley, C; Rosemann, M				Straker, Karla; Wrigley, Cara; Rosemann, Michael			Typologies and touchpoints: designing multi-channel digital strategies	JOURNAL OF RESEARCH IN INTERACTIVE MARKETING			English	Article						Hierarchical relations; Channel management; Channels; Digital channels; Establishing typology; Industry relationship model	INFORMATION-TECHNOLOGY; FUTURE; AGE	Purpose - This study aims to gain a clearer understanding of digital channel design. The emergence of new technologies has revolutionised the way companies interact and engage with customers. The driver for this research was the suggestion that practitioners feel they do not possess the skills to understand and exploit new digital channel opportunities. To gain a clearer understanding of digital …	[Straker, Karla] Queensland Univ Technol, Sch Design, Brisbane, Qld 4001, Australia; [Wrigley, Cara] Queensland Univ Technol, Sch Design, Sch Informat Syst, Brisbane, Qld 4001, Australia; [Rosemann, Michael] Queensland Univ Technol, Sch Informat Syst, Brisbane, Qld 4001, Australia	Queensland University of Technology (QUT); Queensland University of Technology (QUT); Queensland University of Technology (QUT)	Straker, K (corresponding author), Queensland Univ Technol, Sch Design, Brisbane, Qld 4001, Australia.	k.straker@qut.edu.au	Rosemann, Michael/I-9823-2012; Straker, Karla/AAM-3797-2021	Wrigley, Cara/0000-0001-7349-8469; Straker, Karla/0000-0002-6520-4173; Rosemann, Michael/0000-0003-3303-2896					37	37	37	1	38	EMERALD GROUP PUBLISHING LTD	BINGLEY	HOWARD HOUSE, WAGON LANE, BINGLEY BD16 1WA, W YORKSHIRE, ENGLAND	2040-7122	2040-7130		J RES INTERACT MARK	J. Res. Interact. Mark.		2015	9	2
J	DJUKANOVIC, M; NEVICEVIC, M; SOBAJIC, DJ; PAO, YP				DJUKANOVIC, M; NEVICEVIC, M; SOBAJIC, DJ; PAO, YP			CONCEPTUAL DEVELOPMENT OF OPTIMAL LOAD FREQUENCY CONTROL USING ARTIFICIAL NEURAL NETWORKS AND FUZZY SET-THEORY	ENGINEERING INTELLIGENT SYSTEMS FOR ELECTRICAL ENGINEERING AND COMMUNICATIONS			English	Article						OPTIMAL LOAD FREQUENCY CONTROL; ARTIFICIAL NEURAL NETWORKS; FUZZY SET THEORY	AUTOMATIC-GENERATION CONTROL; DYNAMIC SECURITY ASSESSMENT; ELECTRIC-POWER SYSTEMS	Design of a new adaptive optimal load frequency control (LFC) system using an artificial neural network (ANN) and its performance irt a computer simulation of the two-area load frequency control problem is demonstrated In order to achieve minimization of the excursions of area control errors (ACEs), their integrals and control vectors about the steady stare values over a wide range of operating c…	JUGEL,BELGRADE,YUGOSLAVIA; ELECT POWER RES INST,PALO ALTO,CA 94304; CASE WESTERN RESERVE UNIV,DEPT ELECT ENGN & COMP SCI,CLEVELAND,OH 44106; AI WARE INC,CLEVELAND,OH 44106	Electric Power Research Institute (EPRI); Case Western Reserve University	DJUKANOVIC, M (corresponding author), ELECT ENGN INST NIKOLA TESLA,BELGRADE,YUGOSLAVIA.								26	37	37	0	0	C R L PUBLISHING LTD	MARKET HARBOROUGH	PO BOX 31, MARKET HARBOROUGH, LEICS, ENGLAND LE16 9RQ	0969-1170			ENG INTELL SYST ELEC	Eng. Intell. Syst. Elect. Eng. Commun.	JUN	1995	3	2
J	Mikalef, P; Lemmer, K; Schaefer, C; Ylinen, M; Fjortoft, SO; Torvatn, HY; Gupta, M; Niehaves, B				Mikalef, Patrick; Lemmer, Kristina; Schaefer, Cindy; Ylinen, Maija; Fjortoft, Siw Olsen; Torvatn, Hans Yngvar; Gupta, Manjul; Niehaves, Bjoern			Enabling AI capabilities in government agencies: A study of determinants for European municipalities	GOVERNMENT INFORMATION QUARTERLY			English	Article						Artificial intelligence; Public organizations; AI capabilities; TOE framework	BIG DATA ANALYTICS; ARTIFICIAL-INTELLIGENCE; FIRM PERFORMANCE; PLS-SEM; INFORMATION-TECHNOLOGY; USER ACCEPTANCE; ADOPTION; CHALLENGES; MODEL; SERVICES	Artificial Intelligence (AI) is gradually becoming an integral part of the digital strategy of organizations. Yet, the use of AI in public organizations in still lagging significantly compared to private organizations. Prior literature looking into aspects that facilitate adoption and use of AI has concentrated on challenges concerning technical aspects of AI technologies, providing little insigh…	[Mikalef, Patrick; Fjortoft, Siw Olsen; Torvatn, Hans Yngvar] SINTEF Digital, Dept Technol Management, SP Andersens Vei 3, N-7032 Trondheim, Norway; [Lemmer, Kristina; Schaefer, Cindy; Niehaves, Bjoern] Univ Siegen, Inst Business & Informat Syst Engn, Siegen, Germany; [Ylinen, Maija] Tampere Univ Technol, Dept Ind Management, Tampere, Finland; [Gupta, Manjul] Florida Int Univ, Coll Business, Dept…	SINTEF; Universitat Siegen; Tampere University; State University System of Florida; Florida International University	Mikalef, P (corresponding author), SINTEF Digital, Dept Technol Management, SP Andersens Vei 3, N-7032 Trondheim, Norway.	patrick.mikalef@sintef.no	Mikalef, Patrick/GVU-5020-2022	Mikalef, Patrick/0000-0002-6788-2277; Ylinen, Maija Tuulikki/0000-0001-6331-7847	Slovenian Research Agency [P5-0410]	Slovenian Research Agency(Slovenian Research Agency - Slovenia)	The authors acknowledge the financial support from the Slovenian Research Agency (research core funding No. P5-0410).		94	35	35	57	114	ELSEVIER INC	SAN DIEGO	525 B STREET, STE 1900, SAN DIEGO, CA 92101-4495 USA	0740-624X	1872-9517		GOV INFORM Q	Gov. Inf. Q.	OCT	2022	39	4
J	Davis, JL				Davis, Jenny L.			Curation: a theoretical treatment	INFORMATION COMMUNICATION & SOCIETY			English	Article						Identity; curation; production; consumption; digital media; social media	CONTEXT COLLAPSE; PRIVACY; INTERNET; FACEBOOK	Curation is a key mechanism of sociality in a digital era. With an abundance of information, sifting, sorting, selecting, hiding, and standing out become laborious tasks. While researchers have diligently documented people's curatorial strategies, digital curation remains undertheorized in its own right. I therefore theorize digital curation by disentangling productive curation from consumptive c…	[Davis, Jenny L.] James Madison Univ, Dept Sociol, Harrisonburg, VA 22807 USA	James Madison University	Davis, JL (corresponding author), James Madison Univ, Dept Sociol, Harrisonburg, VA 22807 USA.	davis5jl@jmu.edu	Davis, Jenny L/P-1898-2017	Davis, Jenny L/0000-0003-0952-5842					45	35	35	1	42	ROUTLEDGE JOURNALS, TAYLOR & FRANCIS LTD	ABINGDON	2-4 PARK SQUARE, MILTON PARK, ABINGDON OX14 4RN, OXON, ENGLAND	1369-118X	1468-4462		INFORM COMMUN SOC	Info. Commun. Soc.		2017	20	5
J	Ellström, D; Holtstrom, J; Berg, E; Johansson, C				Ellstrom, Daniel; Holtstrom, Johan; Berg, Emma; Johansson, Cecilia			Dynamic capabilities for digital transformation	JOURNAL OF STRATEGY AND MANAGEMENT			English	Article						Digital transformation; Dynamic capabilities; Routines; Digitalization; Qualitative research; Innovation; Technology	TRANSACTION COST; INNOVATION; STRATEGY; MICROFOUNDATIONS; EXPLORATION; INSIGHTS; FIT	Purpose The purpose of this paper is to identify sensing, seizing and reconfiguring routines of dynamic capabilities that enable digital transformation in firms. Design/methodology/approach A qualitative approach is used. Representatives from a firm going through digital transformations are interviewed, and focus groups have been carried out with a consultancy firm experienced in giving advice to…	[Ellstrom, Daniel; Holtstrom, Johan; Berg, Emma; Johansson, Cecilia] Linkoping Univ, Dept Management & Engn, Linkoping, Sweden	Linkoping University	Ellström, D (corresponding author), Linkoping Univ, Dept Management & Engn, Linkoping, Sweden.	daniel.ellstrom@liu.se	Celestino, Leandro/HIR-4215-2022						55	34	34	104	507	EMERALD GROUP PUBLISHING LTD	BINGLEY	HOWARD HOUSE, WAGON LANE, BINGLEY BD16 1WA, W YORKSHIRE, ENGLAND	1755-425X			J STRATEGY MANAG	J. Strategy Manag.	APR 19	2022	15	2
J	Chu, SC; Kamal, S; Kim, Y				Chu, Shu-Chuan; Kamal, Sara; Kim, Yoojung			Re-examining of consumers' responses toward social media advertising and purchase intention toward luxury products from 2013 to 2018: A retrospective commentary	JOURNAL OF GLOBAL FASHION MARKETING			English	Article						Social media advertising; luxury products; beliefs; attitudes; behaviors; purchase intention	FASHION BRANDS; SELF; FACEBOOK; CONSUMPTION; ENGAGEMENT; ATTITUDES; BEHAVIOR; MOTIVES; IMPACTS; TWITTER	The purpose of this retrospective commentary is to re-examine what we know about consumers' response toward social media advertising and purchase intention toward luxury products, as well as review how researchers have cited this article. This commentary is organized as follows. First, it discusses the unique contributions of our article that causes its high impact in the literature. Second, it e…	[Chu, Shu-Chuan] DePaul Univ, Coll Commun, Publ Relat & Advertising, Chicago, IL 60604 USA; [Kim, Yoojung] Konkuk Univ, Coll Liberal Arts, Dept Media & Commun, 120 Neungdong Ro, Seoul 05029, South Korea	DePaul University; Konkuk University	Kim, Y (corresponding author), Konkuk Univ, Coll Liberal Arts, Dept Media & Commun, 120 Neungdong Ro, Seoul 05029, South Korea.	ykim@konkuk.ac.kr							46	34	34	5	59	ROUTLEDGE JOURNALS, TAYLOR & FRANCIS LTD	ABINGDON	2-4 PARK SQUARE, MILTON PARK, ABINGDON OX14 4RN, OXON, ENGLAND	2093-2685	2325-4483		J GLOB FASH MARK	J. Glob. Fash. Mark.		2019	10	1
J	Straker, K; Wrigley, C				Straker, Karla; Wrigley, Cara			Emotionally engaging customers in the digital age: the case study of Burberry love	JOURNAL OF FASHION MARKETING AND MANAGEMENT			English	Article						Digital channels; Customer relationships; Design and emotion; Digital behaviour	LUXURY BRAND; EXPERIENCE; DESIGN; FUTURE	Purpose - The purpose of this paper is to investigate how companies can design digital channels to evoke desired emotions. Design/methodology/approach - The successful business case of retailer Burberry has been examined to understand the strategy and customer engagement of digital channels implemented by decoding the emotional intensions. Findings - Results illustrate that the ability to create …	[Straker, Karla; Wrigley, Cara] Queensland Univ Technol, Sch Design, Brisbane, Qld, Australia	Queensland University of Technology (QUT)	Straker, K (corresponding author), Queensland Univ Technol, Sch Design, Brisbane, Qld, Australia.	k.straker@qut.edu.au	Straker, Karla/AAM-3797-2021	Wrigley, Cara/0000-0001-7349-8469; Straker, Karla/0000-0002-6520-4173					65	34	34	5	67	EMERALD GROUP PUBLISHING LTD	BINGLEY	HOWARD HOUSE, WAGON LANE, BINGLEY BD16 1WA, W YORKSHIRE, ENGLAND	1361-2026	1758-7433		J FASH MARK MANAG	J. Fash. Mark. Manag.		2016	20	3
J	Busca, L; Bertrandias, L				Busca, Laurent; Bertrandias, Laurent			A Framework for Digital Marketing Research: Investigating the Four Cultural Eras of Digital Marketing	JOURNAL OF INTERACTIVE MARKETING			English	Article						Digital marketing; Historical method; Digital cultures; Institutional theory; Practice theory; Cultural framework; Prospective	INSTITUTIONAL WORK; SOCIAL-STRUCTURE; BUSINESS USE; CO-CREATION; CONSUMER; TECHNOLOGY; CONSUMPTION; MANAGEMENT; WEB; TRANSFORMATION	The digital marketing discipline is facing growing fragmentation; the proliferation of different subareas of research impedes the accumulation of knowledge. This fragmentation seems logically tied to the inherent complexity of the Internet, itself resulting from 50 years of evolution. Thus, our aim is to provide an integrative framework for research in digital marketing derived from the historica…	[Busca, Laurent] Univ Montpellier, MRM, Montpellier, France; [Bertrandias, Laurent] TBS Business Sch, Toulouse, France	Universite de Montpellier	Busca, L (corresponding author), Univ Montpellier, MRM, Montpellier, France.	laurent.busca@umontpellier.fr; l.bertrandias@tbs-education.fr		Busca, Laurent/0000-0003-4436-4933					183	33	34	38	217	SAGE PUBLICATIONS INC	THOUSAND OAKS	2455 TELLER RD, THOUSAND OAKS, CA 91320 USA	1094-9968	1520-6653		J INTERACT MARK	J. Interact. Mark.	FEB	2020	49
J	Zhang, Y; Luo, J; Xiong, Z; Liu, H; Wang, L; Gu, YY; Lu, ZF; Li, JH; Huang, JP				Zhang, Ying; Luo, Jun; Xiong, Zheng; Liu, Hua; Wang, Li; Gu, Yingying; Lu, Zifeng; Li, Jinhuan; Huang, Jipeng			User-defined microstructures array fabricated by DMD based multistep lithography with dose modulation	OPTICS EXPRESS			English	Article							MICROLENS ARRAY; TECHNOLOGY	A flexible and efficient strategy, digital micromirror devices (DMD) based multistep lithography (DMSL), is proposed to fabricate arrays of user-defined microstructures. Through the combination of dose modulation, flexible pattern generation of DMD, and high-resolution step movement of piezoelectrical stage (PZS), this method enables prototyping a board range of 2D lattices with periodic/nonperio…	[Zhang, Ying; Luo, Jun; Liu, Hua; Lu, Zifeng; Li, Jinhuan; Huang, Jipeng] Northeast Normal Univ, Coll Phys, Demonstrat Ctr Expt Phys Educ, Changchun 130024, Jilin, Peoples R China; [Xiong, Zheng] Syracuse Univ, Dept Biomed Engn & Chem Engn, Syracuse, NY 13244 USA; [Wang, Li; Gu, Yingying] Beijing Inst Control Engn, Lab Space Optoelect Measurement & Percept, Beijing, Peoples R China; [Liu, Hua] Ch…	Northeast Normal University - China; Syracuse University; Chinese Academy of Sciences; Changchun Institute of Optics, Fine Mechanics & Physics, CAS	Liu, H (corresponding author), Northeast Normal Univ, Coll Phys, Demonstrat Ctr Expt Phys Educ, Changchun 130024, Jilin, Peoples R China.;Liu, H (corresponding author), Chinese Acad Sci, Changchun Inst Opt Fine Mech & Phys, State Key Lab Appl Opt, Changchun 130033, Jilin, Peoples R China.	liuhua_rain@aliyun.com	hua, liu/GXV-5211-2022		National Natural Science Foundation of China [61875036]; Jilin Scientific and Technological Development Program [20190302049GX]	National Natural Science Foundation of China(National Natural Science Foundation of China (NSFC)); Jilin Scientific and Technological Development Program	National Natural Science Foundation of China (No. 61875036); Jilin Scientific and Technological Development Program (20190302049GX).		24	33	34	2	15	OPTICAL SOC AMER	WASHINGTON	2010 MASSACHUSETTS AVE NW, WASHINGTON, DC 20036 USA	1094-4087			OPT EXPRESS	Opt. Express	OCT 28	2019	27	22
J	Pesce, D; Neirotti, P; Paolucci, E				Pesce, Danilo; Neirotti, Paolo; Paolucci, Emilio			When culture meets digital platforms: value creation and stakeholders' alignment in big data use	CURRENT ISSUES IN TOURISM			English	Article						Value creation; big data; digitization; digital transformation; digital platforms; stakeholders' interests; Google Arts & Culture; Europeana	ANALYTICS	Research on big data has highlighted that a crucial element to create value from data is the capability of aligning different stakeholders' interests. However, it has not yet been investigated empirically how this process of alignment can be realized. We conduct a multiple case study on the two leading platforms involved in the online dissemination of cultural heritage - Europeana and Google Arts…	[Pesce, Danilo; Neirotti, Paolo; Paolucci, Emilio] Politecn Torino, Dept Management & Prod Engn, Turin, Italy	Polytechnic University of Turin	Pesce, D (corresponding author), Politecn Torino, Dept Management & Prod Engn, Turin, Italy.	danilo.pesce@polito.it	Paolucci, Emilio/AFD-5843-2022; Pesce, Danilo/B-6390-2018	Paolucci, Emilio/0000-0003-1249-8179; Pesce, Danilo/0000-0002-3405-8396	'Ministero dell'Istruzione, dell'Universita e della Ricerca' Award [TESUN-83486178370409, CAP.1694TIT.232ART.6]	'Ministero dell'Istruzione, dell'Universita e della Ricerca' Award	This work has been partially supported by 'Ministero dell'Istruzione, dell'Universita e della Ricerca' Award 'TESUN-83486178370409 finanziamento dipartimenti di eccellenza CAP.1694TIT.232ART.6'.		32	33	33	21	126	ROUTLEDGE JOURNALS, TAYLOR & FRANCIS LTD	ABINGDON	2-4 PARK SQUARE, MILTON PARK, ABINGDON OX14 4RN, OXON, ENGLAND	1368-3500	1747-7603		CURR ISSUES TOUR	Curr. Issues Tour.	SEP 14	2019	22	15
J	Appolloni, A; Colasanti, N; Fantauzzi, C; Fiorani, G; Frondizi, R				Appolloni, Andrea; Colasanti, Nathalie; Fantauzzi, Chiara; Fiorani, Gloria; Frondizi, Rocco			Distance Learning as a Resilience Strategy during Covid-19: An Analysis of the Italian Context	SUSTAINABILITY			English	Article						higher education; digitalization; distance learning; Covid-19 outbreak; resilience		The purpose of this paper is to analyze the strategic model of distance learning adopted by Italian higher education, showing how the health emergency due to Covid-19 has transformed it from an optional for traditional universities to the only means to ensure public health protection and continuity in education programs. Comparing two situations (before and during the pandemic), the aim is to ide…	[Appolloni, Andrea; Colasanti, Nathalie; Fantauzzi, Chiara; Fiorani, Gloria; Frondizi, Rocco] Univ Roma Tor Vergata, Dept Management & Law, I-00133 Rome, Italy; [Appolloni, Andrea] Natl Res Council CNR, Inst Res Innovat & Serv Dev IRISS, I-80134 Naples, Italy	University of Rome Tor Vergata; Consiglio Nazionale delle Ricerche (CNR); Istituto di Ricerca su Innovazione e Servizi per lo Sviluppo (IRISS-CNR)	Appolloni, A (corresponding author), Univ Roma Tor Vergata, Dept Management & Law, I-00133 Rome, Italy.;Appolloni, A (corresponding author), Natl Res Council CNR, Inst Res Innovat & Serv Dev IRISS, I-80134 Naples, Italy.	andrea.appolloni@uniroma2.it; nathalie.colasanti@uniroma2.it; chiara.fantauzzi@uniroma2.it; gloria.fiorani@uniroma2.it; rocco.frondizi@uniroma2.it	Appolloni, Andrea/L-3607-2014; Frondizi, Rocco/ABH-3850-2020; Fantauzzi, Chiara/HTR-6656-2023	Appolloni, Andrea/0000-0001-5741-398X; Frondizi, Rocco/0000-0002-9913-349X;	University of Rome Tor Vergata, Department of Management and Law; MARIS Master Program in Reporting Innovation Sustainability	University of Rome Tor Vergata, Department of Management and Law; MARIS Master Program in Reporting Innovation Sustainability	This research was supported and funded by the University of Rome Tor Vergata, Department of Management and Law by the research project named Sustainable Development and by the MARIS Master Program in Reporting Innovation Sustainability.		50	32	33	2	18	MDPI	BASEL	ST ALBAN-ANLAGE 66, CH-4052 BASEL, SWITZERLAND		2071-1050		SUSTAINABILITY-BASEL	Sustainability	FEB	2021	13	3
J	Goldstein, K; Briggs, M; Oleynik, V; Cullen, M; Jones, J; Newman, E; Narva, A				Goldstein, Karen; Briggs, Michael; Oleynik, Veronica; Cullen, Mac; Jones, Jewel; Newman, Eileen; Narva, Andrew			Using Digital Media to Promote Kidney Disease Education	ADVANCES IN CHRONIC KIDNEY DISEASE			English	Article						Kidney disease; Health education; Internet; Social media; Health-care providers	CONVERTING ENZYME-INHIBITORS; NONDIABETIC RENAL-DISEASE; PROGRESSION; METAANALYSIS	Health-care providers and patients increasingly turn to the Internet-websites as well as social media platforms-for health-related information and support. Informed by research on audience behaviors and preferences related to digital health information, the National Kidney Disease Education Program (NKDEP) developed a comprehensive and user-friendly digital ecosystem featuring content and platfor…	[Goldstein, Karen; Briggs, Michael; Oleynik, Veronica; Cullen, Mac; Jones, Jewel; Newman, Eileen; Narva, Andrew] Natl Kidney Dis Educ Program, Bethesda, MD 20892 USA		Narva, A (corresponding author), Natl Kidney Dis Educ Program, 2 Democracy Plaza,Room 644,MSC 5458, Bethesda, MD 20892 USA.	narvaa@niddk.nih.gov			Intramural NIH HHS [Z99 DK999999] Funding Source: Medline	Intramural NIH HHS(United States Department of Health & Human ServicesNational Institutes of Health (NIH) - USA)			14	32	33	2	27	W B SAUNDERS CO-ELSEVIER INC	PHILADELPHIA	1600 JOHN F KENNEDY BOULEVARD, STE 1800, PHILADELPHIA, PA 19103-2899 USA	1548-5595			ADV CHRONIC KIDNEY D	Adv. Chronic Kidney Dis.	JUL	2013	20	4
J	Wang, HC; Feng, JZ; Zhang, H; Li, X				Wang, Hecheng; Feng, Junzheng; Zhang, Hui; Li, Xin			The effect of digital transformation strategy on performance The moderating role of cognitive conflict	INTERNATIONAL JOURNAL OF CONFLICT MANAGEMENT			English	Article						Cognitive conflict; Digital transformation strategy; Long-term financial performance; Short-term financial performance	TASK CONFLICT; INFORMATION-TECHNOLOGY; DECISION-MAKING; COMPETITIVE ADVANTAGE; DYNAMIC CAPABILITIES; INTRAGROUP CONFLICT; FIRM PERFORMANCE; MEDIATING ROLE; AS-PRACTICE; SYSTEMS	Purpose The purpose of this study is to verify whether digital transformation strategy (DTS) could improve the organizational performance and provide a comprehensive analysis for enterprises on the necessity of implementing digital transformation in the context of China and draw on the perspectives of Skewed conflict, minority dissent theory and too-much-of-a-good-thing. This study investigates t…	[Wang, Hecheng; Feng, Junzheng; Zhang, Hui; Li, Xin] Hangzhou Dianzi Univ, Sch Management, Hangzhou, Peoples R China	Hangzhou Dianzi University	Feng, JZ (corresponding author), Hangzhou Dianzi Univ, Sch Management, Hangzhou, Peoples R China.	wanghecheng@hdu.edu.cn; firefly0810@hdu.edu.cn; zhanghui816@126.com; firefly0810@126.com			Humanity and Social Science Youth foundation of Ministry of Education of China [18YJC790028]; Chinese National Funding of Social Sciences [19BGJ014, 17BJY072]; National Natural Science Foundation of China [71372170]; Youth key Project of the Major Humanities and Social Sciences Program in Zhejiang Colleges and Universities [2018QN017]	Humanity and Social Science Youth foundation of Ministry of Education of China; Chinese National Funding of Social Sciences; National Natural Science Foundation of China(National Natural Science Foundation of China (NSFC)); Youth key Project of the Major Humanities and Social Sciences Program in Zhejiang Colleges and Universities	The authors appreciate the anonymous reviewers' constructive comments and suggestions and would like to thank Prof. Steven Si for his deep insights and kind support. This research is supported by Humanity and Social Science Youth foundation of Ministry of Education of China (Project Number: 18YJC790028), Chinese National Funding of Social Sciences (Project Number: 19BGJ014, 17BJY072), National Na…		96	31	32	40	362	EMERALD GROUP PUBLISHING LTD	BINGLEY	HOWARD HOUSE, WAGON LANE, BINGLEY BD16 1WA, W YORKSHIRE, ENGLAND	1044-4068	1758-8545		INT J CONFL MANAGE	Int. J. Confl. Manage.	APR 1	2020	31	3
J	Gerardi, G; Abbene, L				Gerardi, G.; Abbene, L.			A digital approach for real time high-rate high-resolution radiation measurements	NUCLEAR INSTRUMENTS & METHODS IN PHYSICS RESEARCH SECTION A-ACCELERATORS SPECTROMETERS DETECTORS AND ASSOCIATED EQUIPMENT			English	Article						Digital pulse processing; Pulse height analysis; Pulse shape analysis; Real time processing; Dead time correction; Energy resolved photon counting	RAY SPECTROSCOPY; DETECTORS; CDTE; PERFORMANCE; GAMMA; CONSTRAINTS; PROGRESS; SYSTEM; FILTER	Modern spectrometers are currently developed by using digital pulse processing (DPP) systems, showing several advantages over traditional analog electronics. The aim of this work is to present digital strategies, in a time domain, for the development of real time high-rate high-resolution spectrometers. We propose a digital method, based on the single delay line (SDL) shaping technique, able to p…	[Gerardi, G.; Abbene, L.] Univ Palermo, Dipartimento Fis & Chim, I-90128 Palermo, Italy	University of Palermo	Abbene, L (corresponding author), Univ Palermo, Dipartimento Fis & Chim, Edificio 18, I-90128 Palermo, Italy.	leonardo.abbene@unipa.it		ABBENE, Leonardo/0000-0001-9633-6606	Italian Ministry for Education, University and Research (MIUR) [2012WM9MEP]	Italian Ministry for Education, University and Research (MIUR)(Ministry of Education, Universities and Research (MIUR))	This work was supported by the Italian Ministry for Education, University and Research (MIUR) under PRIN Project No. 2012WM9MEP.		42	31	32	1	19	ELSEVIER	AMSTERDAM	RADARWEG 29, 1043 NX AMSTERDAM, NETHERLANDS	0168-9002	1872-9576		NUCL INSTRUM METH A	Nucl. Instrum. Methods Phys. Res. Sect. A-Accel. Spectrom. Dect. Assoc. Equip.	DEC 21	2014	768
J	Frishammar, J; Cenamor, J; Cavalli-Björkman, H; Hernell, E; Carlsson, J				Frishammar, Johan; Cenamor, Javier; Cavalli-Bjorkman, Harald; Hernell, Emma; Carlsson, Johan			Digital strategies for two-sided markets: A case study of shopping malls	DECISION SUPPORT SYSTEMS			English	Article						Digitalization; Two-sided market; Omnichannel strategies; Shopping mall; Retailing; Interpretative case study	MULTICHANNEL CUSTOMER MANAGEMENT; INFORMATION-SYSTEMS; SERVICE INNOVATION; BUSINESS STRATEGY; E-COMMERCE; FRAMEWORK; COMPETITION; TECHNOLOGY; PLATFORMS; ECONOMICS	Digitalization is fundamentally changing the retailing ecosystem for shopping malls as digital and analogue elements get increasingly intertwined. We conceptualize shopping malls as two-sided markets whose primary function is connecting shoppers and retailers. By means of an interpretative case study, the article then presents an omnichannel strategy typology for how shopping malls can meet the e…	[Frishammar, Johan] Lulea Univ Technol, Entrepreneurship & Innovat, SE-97187 Lulea, Sweden; [Cenamor, Javier] Lund Univ, Sch Econ & Management, Dept Business Adm, S-22007 Lund, Sweden; [Cavalli-Bjorkman, Harald] Re Newcell AB, Cardellgatan 1, SE-11436 Stockholm, Sweden; [Hernell, Emma] HUI Res, SE-10329 Stockholm, Sweden; [Carlsson, Johan] EVRY Sweden AB, Olof Asklunds Gata 10, S-42130 Vastra Fro…	Lulea University of Technology; Lund University	Frishammar, J (corresponding author), Lulea Univ Technol, Entrepreneurship & Innovat, SE-97187 Lulea, Sweden.	Johan.Frishammar@ltu.se; javier.cenamor@fek.lu.se; harald.cavalli-bjorkman@renewcell.com; emma.hernell@hui.se; johan.carlsson@evry.com		CENAMOR, JAVIER/0000-0002-7432-3713	Swedish Governmental Agency for Innovation Systems (VINNOVA)	Swedish Governmental Agency for Innovation Systems (VINNOVA)(Vinnova)	The authors are grateful for comments provided by James Marsden, Christy Cheung, Yang Chen, Chee-Wee Tan and two anonymous reviewers. The research was funded by the Swedish Governmental Agency for Innovation Systems (VINNOVA).		81	30	31	13	146	ELSEVIER SCIENCE BV	AMSTERDAM	PO BOX 211, 1000 AE AMSTERDAM, NETHERLANDS	0167-9236	1873-5797		DECIS SUPPORT SYST	Decis. Support Syst.	APR	2018	108
J	Staggers, N; Elias, BL; Makar, E; Alexander, GL				Staggers, Nancy; Elias, Beth L.; Makar, Ellen; Alexander, Gregory L.			The Imperative of Solving Nurses' Usability Problems With Health Information Technology	JOURNAL OF NURSING ADMINISTRATION			English	Article							PATIENT SAFETY; RECOMMENDATIONS; SYSTEMS; SUPPORT; CARE; AMIA	BACKGROUND Health information technology (IT) usability issues are a key concern for nurse executives and nurses. OBJECTIVES The aims of this study are to understand usability pain points faced by nurses regarding the use of health IT, identify their impact and importance, discuss responsibilities, and develop possible solutions to improve the health IT-user experience for nurses. METHODS Twenty-…	[Staggers, Nancy] Univ Utah, Summit Hlth Informat, Salt Lake City, UT USA; [Staggers, Nancy] Univ Utah, Dept Biomed Informat, Salt Lake City, UT USA; Univ Utah, Coll Nursing, Salt Lake City, UT 84112 USA; [Elias, Beth L.] Virginia Commonwealth Univ, Sch Nursing, 1100 E Leigh St, Richmond, VA 23298 USA; [Makar, Ellen] INOVA Fairfax Hosp, Profess Practice, Falls Church, VA USA; [Alexander, Gregory …	Utah System of Higher Education; University of Utah; Utah System of Higher Education; University of Utah; Utah System of Higher Education; University of Utah; Virginia Commonwealth University; Inova Fairfax Hospital; University of Missouri System; University of Missouri Columbia	Elias, BL (corresponding author), Virginia Commonwealth Univ, Sch Nursing, 1100 E Leigh St, Richmond, VA 23298 USA.	belias@vcu.edu							26	30	30	0	5	LIPPINCOTT WILLIAMS & WILKINS	PHILADELPHIA	TWO COMMERCE SQ, 2001 MARKET ST, PHILADELPHIA, PA 19103 USA	0002-0443	1539-0721		J NURS ADMIN	J. Nurs. Adm.	APR	2018	48	4
J	Morales-Caporal, R; Pacas, M				Morales-Caporal, Roberto; Pacas, Mario			Suppression of Saturation Effects in a Sensorless Predictive Controlled Synchronous Reluctance Machine Based on Voltage Space Phasor Injections	IEEE TRANSACTIONS ON INDUSTRIAL ELECTRONICS			English	Article						Cross saturation; predictive control; sensorless control; synchronous reluctance machine (SynRM); torque control	INDUCTION-MOTORS; TORQUE CONTROL; VERY-LOW; ZERO; FREQUENCY	This paper presents a digital strategy to suppress magnetic-and cross-saturation effects in a sensorless predictive direct-torque-controlled synchronous reluctance machine (SynRM). In SynRMs, the angular position of the rotor can be estimated by using inductance variations due to geometrical effects of the rotor. However, magnetic-and cross-saturation effects lead to large errors on the estimated…	[Morales-Caporal, Roberto] Technol Inst Apizaco, Postgrad Studies & Res Div, Apizaco 90300, Mexico; [Pacas, Mario] Univ Siegen, Inst Power Elect & Elect Drives, D-57068 Siegen, Germany	Universitat Siegen	Morales-Caporal, R (corresponding author), Technol Inst Apizaco, Postgrad Studies & Res Div, Apizaco 90300, Mexico.	rmcaporal@ieee.org; jmpacas@ieee.org	Morales Caporal, Roberto/AGJ-8245-2022	Morales-Caporal, Roberto/0000-0002-6115-0454	PROMEP [ITAPI-PTC-002]	PROMEP	Manuscript received February 11, 2010; revised June 3, 2010; accepted August 4, 2010. Date of publication September 27, 2010; date of current version June 15, 2011. This work was supported by the PROMEP under Grant ITAPI-PTC-002.		31	30	31	0	9	IEEE-INST ELECTRICAL ELECTRONICS ENGINEERS INC	PISCATAWAY	445 HOES LANE, PISCATAWAY, NJ 08855-4141 USA	0278-0046	1557-9948		IEEE T IND ELECTRON	IEEE Trans. Ind. Electron.	JUL	2011	58	7
J	Zheng, WM; Liao, ZX; Lin, ZB				Zheng, Weimin; Liao, Zhixue; Lin, Zhibin			Navigating through the complex transport system: A heuristic approach for city tourism recommendation	TOURISM MANAGEMENT			English	Article						Tourism recommendation system; Smart tourism; City tourism; Transport mode choice; Multi-objective optimization; Nondominated sorting heuristic approach	PARTICLE SWARM OPTIMIZATION; DIFFERENTIAL EVOLUTION; SMART TOURISM; ALGORITHM; DESIGN; ROUTE; INFORMATION; BEHAVIOR; SERVICE; GPS	The fast development of machine learning and artificial intelligence has led to a great improvement of the smart tourism recommendation system, however many problems associated with the choice of transport modes in city tourism have yet to be solved. This research attempts to address this issue by proposing a model of customized day itineraries with consideration of transport mode choice. With im…	[Zheng, Weimin] Xiamen Univ, Sch Management, 422 South Siming Rd, Xiamen 361005, Peoples R China; [Liao, Zhixue] Southwestern Univ Finance & Econ, Sch Business Adm, 555 Liutai Ave, Chengdu 611130, Peoples R China; [Lin, Zhibin] Univ Durham, Business Sch, Mill Hill Lane, Durham DH1 3LB, England	Xiamen University; Southwestern University of Finance & Economics - China; Durham University	Liao, ZX (corresponding author), Southwestern Univ Finance & Econ, Sch Business Adm, 555 Liutai Ave, Chengdu 611130, Peoples R China.	liaozhixue@swufe.edu.cn	WU, ZHEN/GRN-7688-2022; zheng, wei/IQT-9639-2023; Lin, Zhibin/ACD-8628-2022; Lin, Zhibin/R-7541-2018	WU, ZHEN/0000-0001-8719-057X; Lin, Zhibin/0000-0001-5575-2216; Lin, Zhibin/0000-0001-5575-2216	National Natural Science Foundation of China [71971179, 71701167, 71601164, 71671152]; Humanities and Social Science Projects of the Ministry of Education of China [17YJC630078]	National Natural Science Foundation of China(National Natural Science Foundation of China (NSFC)); Humanities and Social Science Projects of the Ministry of Education of China(Ministry of Education, China)	This research received grants from the National Natural Science Foundation of China (No.71971179, No.71701167, No.71601164, No.71671152) and Humanities and Social Science Projects of the Ministry of Education of China (No.17YJC630078).		60	29	29	23	210	ELSEVIER SCI LTD	OXFORD	THE BOULEVARD, LANGFORD LANE, KIDLINGTON, OXFORD OX5 1GB, OXON, ENGLAND	0261-5177	1879-3193		TOURISM MANAGE	Tourism Manage.	DEC	2020	81
J	Thurman, N; Fletcher, R				Thurman, Neil; Fletcher, Richard			Has Digital Distribution Rejuvenated Readership? Revisiting the age demographics of newspaper consumption	JOURNALISM STUDIES			English	Article						age; attention; audience measurement; cohort effects; demography; newspaper consumption; online editions; time spent	NEWS; EUROPE	Newspapers' democratic functions have not been fully assumed by the media capturing the revenues newspapers used to enjoy. It is, therefore, important to understand the determinants of newspaper use. Earlier studies found age to be the principal determinant, but did not account for newspapers' online editions. This article investigates to what extent digital distribution has disrupted previously …	[Thurman, Neil] Ludwig Maximilians Univ Munchen, Dept Commun Studies & Media Res, Munich, Germany; [Thurman, Neil] City Univ London, London, England; [Fletcher, Richard] Univ Oxford, Reuters Inst Study Journalism, Oxford, England	University of Munich; City University London; University of Oxford	Thurman, N (corresponding author), Ludwig Maximilians Univ Munchen, Dept Commun Studies & Media Res, Munich, Germany.;Thurman, N (corresponding author), City Univ London, London, England.	neil.thurman@ifkw.lmu.de; richard.fletcher@politics.ox.ac.uk	Fletcher, Richard/V-4402-2019	Fletcher, Richard/0000-0002-5496-2112; Thurman, Neil/0000-0003-3909-9565	Volkswagen Foundation [A110823/88171]; Google UK as part of the Digital News Initiative [CTR00220]; Digital News Report [CTR00150]	Volkswagen Foundation(Volkswagen); Google UK as part of the Digital News Initiative(Google Incorporated); Digital News Report	The research was supported by a research grant from the Volkswagen Foundation (A110823/88171), with additional support from Google UK as part of the Digital News Initiative (CTR00220), and the Digital News Report (CTR00150).		45	28	29	1	9	ROUTLEDGE JOURNALS, TAYLOR & FRANCIS LTD	ABINGDON	2-4 PARK SQUARE, MILTON PARK, ABINGDON OX14 4RN, OXON, ENGLAND	1461-670X	1469-9699		JOURNALISM STUD	Journal. Stud.	MAR 12	2019	20	4
J	Rodgers, S				Rodgers, Scott			Foreign objects? Web content management systems, journalistic cultures and the ontology of software	JOURNALISM			English	Article						Actor-network theory; computation; digital media; newspapers; organizational theory; phenomenology; practice theory; site ontology; software; web content management systems	ONLINE NEWSROOMS; INNOVATION; INTERACTIVITY; ETHNOGRAPHY	Research on digital' journalism has focused largely on online news, with comparatively less interest in the longer-term implications of software and computational technologies. Drawing upon a 6-year study of the Toronto Star, this article provides an account of TOPS, an in-house web content management system which served as the backbone of thestar.com for 6 years. For some, TOPS was a successful …	[Rodgers, Scott] Univ London, London WC1H 0PD, England	University of London	Rodgers, S (corresponding author), Univ London, Dept Film Media & Cultural Studies, 43 Gordon Sq, London WC1H 0PD, England.	s.rodgers@bbk.ac.uk		Rodgers, Scott/0000-0002-1544-8743					42	28	28	1	42	SAGE PUBLICATIONS INC	THOUSAND OAKS	2455 TELLER RD, THOUSAND OAKS, CA 91320 USA	1464-8849	1741-3001		JOURNALISM	Journalism	JAN	2015	16	1
J	Knudsen, KE; Willman, C; Winn, R				Knudsen, Karen E.; Willman, Cheryl; Winn, Robert			Optimizing the Use of Telemedicine in Oncology Care: Postpandemic Opportunities	CLINICAL CANCER RESEARCH			English	Article							TELECONSENT; TELEHEALTH; COVID-19	Utilization of telehealth as part of the cancer care delivery continuum dramatically escalated in response to the COVID-19 pandemic at major cancer centers across the globe. The rapid shift toward telehealth visits for nontreatment cancer care provided immediate benefit through reducing unnecessary risk of exposure, overcoming transportation barriers faced by both patients and caregivers, and fas…	[Knudsen, Karen E.] Jefferson Hlth, Sidney Kimmel Canc Ctr, 233 S 10th St,Bluemle BLSB 1050, Philadelphia, PA 19107 USA; [Knudsen, Karen E.] Thomas Jefferson Univ, Philadelphia, PA 19107 USA; [Willman, Cheryl] Univ New Mexico, Comprehens Canc Ctr, Albuquerque, NM 87131 USA; [Winn, Robert] Virginia Commonwealth Univ, Massey Canc Ctr, Richmond, VA USA	Jefferson University; Jefferson University; University of New Mexico; Virginia Commonwealth University	Knudsen, KE (corresponding author), Jefferson Hlth, Sidney Kimmel Canc Ctr, 233 S 10th St,Bluemle BLSB 1050, Philadelphia, PA 19107 USA.	karen.knudsen@jefferson.edu		Winn, Robert A/0000-0001-5948-9291	NCI [P30 CA05560]	NCI(United States Department of Health & Human ServicesNational Institutes of Health (NIH) - USANIH National Cancer Institute (NCI))	The authors would like to thank the oncology and telehealth teams at our respective institutions who have worked tirelessly to ensure rapid access to continued cancer care during the ongoing global pandemic. Particular appreciation is also extended to Drs. A.M. Lopez, A. Chapman, J. Hollander, and A. Leader in addition to V. Cisk, J. Palidora, and A. Khariton (Sidney Kimmel Cancer Center at Jeffe…		26	27	27	1	6	AMER ASSOC CANCER RESEARCH	PHILADELPHIA	615 CHESTNUT ST, 17TH FLOOR, PHILADELPHIA, PA 19106-4404 USA	1078-0432	1557-3265		CLIN CANCER RES	Clin. Cancer Res.	FEB 15	2021	27	4
J	Munro, M				Munro, Morag			The complicity of digital technologies in the marketisation of UK higher education: exploring the implications of a critical discourse analysis of thirteen national digital teaching and learning strategies	INTERNATIONAL JOURNAL OF EDUCATIONAL TECHNOLOGY IN HIGHER EDUCATION			English	Article						Digital technologies; Higher education policy and strategy; Marketisation of HE; Neoliberalism; Critical discourse analysis	ONLINE; PARTICIPATION	National strategies play a crucial role in framing how digital technologies are enacted in Higher Education (HE). This paper draws on some of the findings of a Critical Discourse Analysis (CDA) of thirteen digital teaching and learning strategies issued by government departments and non-departmental public bodies in the UK between 2003 and 2013. It demonstrates that, across the strategies, digita…	[Munro, Morag] Maynooth Univ, Ctr Teaching & Learning, Maynooth, Kildare, Ireland	Maynooth University	Munro, M (corresponding author), Maynooth Univ, Ctr Teaching & Learning, Maynooth, Kildare, Ireland.	morag.munro@mu.ie							136	27	29	4	21	SPRINGER	NEW YORK	ONE NEW YORK PLAZA, SUITE 4600, NEW YORK, NY, UNITED STATES	2365-9440			INT J EDUC TECHNOL H	Int. J. Educ. Technol. High. Educ.	MAR 29	2018	15
J	Azaïs, F; Bertrand, Y; Renovell, M; Ivanov, A; Tabatabaei, S				Azaïs, F; Bertrand, Y; Renovell, M; Ivanov, A; Tabatabaei, S			An all-digital DFT scheme for testing catastrophic faults in PLLs	IEEE DESIGN & TEST OF COMPUTERS			English	Article								Traditional functional testing of mixed-signal ICs is slow and requires costly, dedicated test equipment. The authors update the standard PLL architecture to allow simple digital testing. The all-digital strategy yields catastrophic fault coverage as high as that of the classical functional test, plus it is fast, extremely simple to implement and requires only standard digital test equipment.	Univ Montpellier, CNRS, Microelect Dept, LIRMM, F-34392 Montpellier, France; Univ British Columbia, Dept Elect & Comp Engn, Vancouver, BC V5Z 1M9, Canada	Centre National de la Recherche Scientifique (CNRS); Universite Paul-Valery; Universite Perpignan Via Domitia; Universite de Montpellier; University of British Columbia		azais@lirmm.fr							12	27	28	0	1	IEEE COMPUTER SOC	LOS ALAMITOS	10662 LOS VAQUEROS CIRCLE, PO BOX 3014, LOS ALAMITOS, CA 90720-1314 USA	0740-7475	1558-1918		IEEE DES TEST COMPUT	IEEE Des. Test Comput.	JAN-FEB	2003	20	1
J	Zheng, R; Li, Z; Na, S				Zheng, Run; Li, Zhuyuan; Na, Sanggyun			How customer engagement in the live-streaming affects purchase intention and customer acquisition, E-tailer?s perspective	JOURNAL OF RETAILING AND CONSUMER SERVICES			English	Article						Retailing; Live streaming; Customer engagement; E-tailers; Purchase intention; Customer acquisition	CONSUMER-BRAND ENGAGEMENT; SOCIAL-MEDIA ENGAGEMENT; WORD-OF-MOUTH; BEHAVIOR; IMPACT; DYNAMICS; SATISFACTION; PERFORMANCE; RETENTION; SALES	In the emerging retail market, e-tailers operating in developing economies have to cope with the rapid use of the Internet, new electronic purchasing methods and online selling platforms. However, e-tailers do not understand the effect patterns in which customer engagement on purchase intention and customer acquisition. From e-tailers' perspective, this study explores how customer engagement beha…	[Zheng, Run; Li, Zhuyuan; Na, Sanggyun] Wonkwang Univ, Coll Business Adm, 460 Iksandae Ro, Iksan 54538, South Korea	Wonkwang University	Li, Z (corresponding author), Wonkwang Univ, Coll Business Adm, 460 Iksandae Ro, Iksan 54538, South Korea.	runzheng290@gmail.com; lzyazr520@gmail.com; nsghy@wku.ac.kr	zhuyuan, li/IUN-4515-2023	Li, Zhuyuan/0000-0003-4640-5129	Wonkwang University	Wonkwang University	This paper was supported by Wonkwang University in 2022.		94	26	26	40	194	ELSEVIER SCI LTD	OXFORD	THE BOULEVARD, LANGFORD LANE, KIDLINGTON, OXFORD OX5 1GB, OXON, ENGLAND	0969-6989	1873-1384		J RETAIL CONSUM SERV	J. Retail. Consum. Serv.	SEP	2022	68
J	Büyüközkan, G; Havle, CA; Feyzioglu, O				Buyukozkan, Gulcin; Havle, Celal Alpay; Feyzioglu, Orhan			An integrated SWOT based fuzzy AHP and fuzzy MARCOS methodology for digital transformation strategy analysis in airline industry	JOURNAL OF AIR TRANSPORT MANAGEMENT			English	Article						Airline industry; Digital transformation; SWOT Analysis; Fuzzy AHP; Fuzzy MARCOS	ANP-BASED SWOT; DECISION-MAKING; SUPPLIER SELECTION; RISK-ASSESSMENT; TOPSIS; FRAMEWORK; PROJECTS; MODEL	Driven by business strategies, digital transformation (DT) facilitates dramatic change in air passenger behavior. This study aims to determine and analyze different DT strategies (DTSs) with the help of an integrated SWOTbased fuzzy AHP-MARCOS methodology that is proposed for the first time in the literature for this purpose. This methodology is validated with a case study concerning the airline …	[Buyukozkan, Gulcin; Havle, Celal Alpay; Feyzioglu, Orhan] Galatasaray Univ, Dept Ind Engn, TR-34349 Istanbul, Turkey; [Havle, Celal Alpay] Ozyegin Univ, Dept Profess Flight, Fac Aviat & Aeronaut Sci, Istanbul, Turkey	Galatasaray University; Ozyegin University	Büyüközkan, G (corresponding author), Galatasaray Univ, Dept Ind Engn, TR-34349 Istanbul, Turkey.	gbuyukozkan@gsu.edu.tr; celal.alpay.havle@gmail.com; ofeyzioglu@gsu.edu.tr	Feyzioglu, Orhan/AAG-5351-2019	Feyzioglu, Orhan/0000-0002-8919-191X					81	26	26	6	49	ELSEVIER SCI LTD	OXFORD	THE BOULEVARD, LANGFORD LANE, KIDLINGTON, OXFORD OX5 1GB, OXON, ENGLAND	0969-6997	1873-2089		J AIR TRANSP MANAG	J. Air Transp. Manag.	OCT	2021	97
J	Radanliev, P; De Roure, D; Burnap, P; Santos, O				Radanliev, Petar; De Roure, David; Burnap, Pete; Santos, Omar			Epistemological Equation for Analysing Uncontrollable States in Complex Systems: Quantifying Cyber Risks from the Internet of Things	REVIEW OF SOCIONETWORK STRATEGIES			English	Article						Epistemological analysis; Internet of Things; Risk transformation roadmap; Cyber risk regulations; Empirical analysis; Cyber risk self-assessment; Cyber risk target state		The Internet-of-Things (IoT) triggers data protection questions and new types of cyber risks. Cyber risk regulations for the IoT, however, are still in their infancy. This is concerning, because companies integrating IoT devices and services need to perform a self-assessment of its IoT cyber security posture. At present, there are no self-assessment methods for quantifying IoT cyber risk posture.…	[Radanliev, Petar; De Roure, David] Univ Oxford, Dept Engn Sci, Oxford eRes Ctr, Oxford, England; [Burnap, Pete] Cardiff Univ, Sch Comp Sci & Informat, Cardiff, Wales; [Santos, Omar] Cisco Res Ctr, Durham, NC USA	University of Oxford; Cardiff University; Cisco Systems Inc	Radanliev, P (corresponding author), Univ Oxford, Dept Engn Sci, Oxford eRes Ctr, Oxford, England.	petar.radanliev@oerc.ox.ac.uk	Radanliev, Petar/L-7509-2015	Radanliev, Petar/0000-0001-5629-6857	EPSRC [EP/S035362/1]; Cisco Research Centre [CG1525381]; EPSRC [EP/S035362/1] Funding Source: UKRI	EPSRC(UK Research & Innovation (UKRI)Engineering & Physical Sciences Research Council (EPSRC)); Cisco Research Centre; EPSRC(UK Research & Innovation (UKRI)Engineering & Physical Sciences Research Council (EPSRC))	This work was funded by the EPSRC [Grant Number: EP/S035362/1] and by the Cisco Research Centre [Grant Number CG1525381]. Earlier versions of this work from the combined working papers and project reports prepared for the PETRAS National Centre of Excellence and the Cisco Research Centre can be found in a pre-print online.		58	26	26	2	6	SPRINGER JAPAN KK	TOKYO	SHIROYAMA TRUST TOWER 5F, 4-3-1 TORANOMON, MINATO-KU, TOKYO, 105-6005, JAPAN	2523-3173	1867-3236		REV SOCIONETWORK STR	Rev. Socionetwork Strateg.	DEC	2021	15	2
J	Pateli, A; Mylonas, N; Spyrou, A				Pateli, Adamantia; Mylonas, Naoum; Spyrou, Aggeliki			Organizational Adoption of Social Media in the Hospitality Industry: An Integrated Approach Based on DIT and TOE Frameworks	SUSTAINABILITY			English	Article						social media adoption; diffusion of innovation theory; TOE; hospitality industry	PLS-SEM; INFORMATION-TECHNOLOGY; SMES ADOPTION; E-BUSINESS; PERFORMANCE; INNOVATION; DIFFUSION; TOURISM; SYSTEMS; MODELS	The importance of the organizational adoption of social media is increasingly raised in hospitality literature because of the recognition of Web 2.0 technologies as a significant tool for improving customer information searching and experience, as well as for enriching firm digital strategy. The present study seeks to empirically explore the determinant factors that affect a hospitality firm's de…	[Pateli, Adamantia; Spyrou, Aggeliki] Ionian Univ, Dept Informat, Tsirigoti Sq 7, Corfu 49100, Greece; [Mylonas, Naoum] Ionian Univ, Dept Tourism, P Vraila Armeni 4, Corfu 49132, Greece	Ionian University; Ionian University	Mylonas, N (corresponding author), Ionian Univ, Dept Tourism, P Vraila Armeni 4, Corfu 49132, Greece.	pateli@ionio.gr; nmylonas@ionio.gr; c15spyr@ionio.gr	Pateli, Adamantia/AAM-3196-2021; Mylonas, Naoum/AAD-8214-2019	Pateli, Adamantia/0000-0001-8649-1303; Mylonas, Naoum/0000-0002-4286-8022					110	26	26	8	49	MDPI	BASEL	ST ALBAN-ANLAGE 66, CH-4052 BASEL, SWITZERLAND		2071-1050		SUSTAINABILITY-BASEL	Sustainability	SEP	2020	12	17
J	Demeter, K; Losonci, D; Nagy, J				Demeter, Krisztina; Losonci, David; Nagy, Judit			Road to digital manufacturing - a longitudinal case-based analysis	JOURNAL OF MANUFACTURING TECHNOLOGY MANAGEMENT			English	Article						Industry 4; 0; Digitalization; Case study; Automotive industry	INDUSTRY 4.0 TECHNOLOGIES; DYNAMIC CAPABILITIES; ABSORPTIVE-CAPACITY; MICROFOUNDATIONS; IMPLEMENTATION; EXPLORATION	Purpose The authors' main objective is to examine the resource alteration underlying the digital manufacturing transformation. The authors rely on the adaptation aspect of dynamic capabilities (DC) theory and their analysis shows how and why a factory adapts its resources and capabilities during digital transformation. Design/methodology/approach To grasp the change, the authors apply the longitu…	[Demeter, Krisztina; Losonci, David; Nagy, Judit] Corvinus Univ Budapest, Dept Logist & Supply Chain Management, Budapest, Hungary	Corvinus University Budapest	Demeter, K (corresponding author), Corvinus Univ Budapest, Dept Logist & Supply Chain Management, Budapest, Hungary.	krisztina.demeter@uni-corvinus.hu; david.losonci@uni-corvinus.hu; judit.nagy@uni-corvinus.hu	Nagy, Judit/AAE-3341-2022; Nagy, Judit/HZL-6228-2023; Losonci, Dávid/A-7808-2013; Demeter, Krisztina/B-1310-2013	Nagy, Judit/0000-0001-8275-1550; Nagy, Judit/0000-0001-8275-1550; Losonci, Dávid/0000-0003-0073-7849; Demeter, Krisztina/0000-0002-5967-8540	project Aspects on the development of intelligent, sustainable and inclusive society: social, technological, innovation networks in employment and digital economy [EFOP-3.6.2-16-2017-00007]; EU; European Social Fund	project Aspects on the development of intelligent, sustainable and inclusive society: social, technological, innovation networks in employment and digital economy; EU(European Union (EU)); European Social Fund(European Social Fund (ESF))	This research was supported by the project Aspects on the development of intelligent, sustainable and inclusive society: social, technological, innovation networks in employment and digital economy (EFOP-3.6.2-16-2017-00007). The project has been supported by the EU, co-financed by the European Social Fund and the budget of Hungary.		58	26	26	23	172	EMERALD GROUP PUBLISHING LTD	BINGLEY	HOWARD HOUSE, WAGON LANE, BINGLEY BD16 1WA, W YORKSHIRE, ENGLAND	1741-038X	1758-7786		J MANUF TECHNOL MANA	J. Manuf. Technol. Manag.	MAR 25	2021	32	3
J	Xiao, JH				Xiao, Junhong			Digital transformation in higher education: critiquing the five-year development plans (2016-2020) of 75 Chinese universities	DISTANCE EDUCATION			English	Article						China; digital transformation; digital strategy; higher education; institutional development plan; national policy	RESEARCH TRENDS; TECHNOLOGY; DECADES; IMPACT	This study examined how the role of digitalization is framed in the strategic development plans of 75 top universities in China. Findings show that digitalization as perceived by these universities features instrumentality (e-campus construction and application) and modernization (sustaining and efficiency innovations in teaching and learning), a situation also seen in other countries. On the oth…	[Xiao, Junhong] Shantou Radio & Televis Univ, Dept Foreign Languages, 8 Leshan Rd, Shantou 515041, Guangdong, Peoples R China		Xiao, JH (corresponding author), Shantou Radio & Televis Univ, Dept Foreign Languages, 8 Leshan Rd, Shantou 515041, Guangdong, Peoples R China.	frankxjh@gmail.com	Xiao, Junhong/AAF-5715-2020	Xiao, Junhong/0000-0002-5316-2957					77	26	27	5	95	ROUTLEDGE JOURNALS, TAYLOR & FRANCIS LTD	ABINGDON	2-4 PARK SQUARE, MILTON PARK, ABINGDON OX14 4RN, OXON, ENGLAND	0158-7919	1475-0198		DISTANCE EDUC	Distance Educ.		2019	40	4
J	Scupola, A; Mergel, I				Scupola, Ada; Mergel, Ines			Co-production in digital transformation of public administration and public value creation: The case of Denmark	GOVERNMENT INFORMATION QUARTERLY			English	Article						Digital transformation; Public value; Co-production; Public service delivery; Public administration; Digital strategy; Digital policy	MANAGEMENT; GOVERNMENT; IMPACTS	Public administrations are investing in the digital transformation of their citizen-oriented services and internal administrative processes. They are using co-production approaches and include different types of stakeholders into these transformative processes to increase service quality and generate public value. In this study, we investigate how these co-production approaches are implemented in…	[Scupola, Ada] Roskilde Univ, Dept Social Sci & Business, Univ Svej 1, DK-4000 Roskilde, Denmark; [Mergel, Ines] Univ Konstanz, Dept Polit & Publ Adm, Univ Str 10, D-78464 Constance, Germany	Roskilde University; University of Konstanz	Scupola, A (corresponding author), Roskilde Univ, Dept Social Sci & Business, Univ Svej 1, DK-4000 Roskilde, Denmark.	ada@ruc.dk; ines.mergel@uni-konstanz.de		Scupola, Ada/0000-0002-3537-7639	European Union [770356]	European Union(European Union (EU))	This project has received funding from the European Union's Horizon 2020 research and innovation programme under grant agreement No 770356. This publication reflects the views only of the authors, and the Agency cannot be held responsible for any use, which may be made of the information contained therein.		69	25	26	48	182	ELSEVIER INC	SAN DIEGO	525 B STREET, STE 1900, SAN DIEGO, CA 92101-4495 USA	0740-624X	1872-9517		GOV INFORM Q	Gov. Inf. Q.	JAN	2022	39	1
J	McIntyre, DP; Srinivasan, A; Chintakananda, A				McIntyre, David P.; Srinivasan, Arati; Chintakananda, Asda			The persistence of platforms: The role of network, platform, and complementor attributes	LONG RANGE PLANNING			English	Article						Platforms; Digital strategy; Network effects; Complements	EMPIRICAL-ANALYSIS; MARKETS; SOFTWARE; STRATEGY; QUALITY; US; EXTERNALITIES; PERFORMANCE; COMPETITION; INNOVATION	Existing research on digital platforms emphasizes the contexts that enable such platforms - and their sponsoring firms -to emerge and achieve market dominance. However, this body of research has not sufficiently addressed the ability of certain platform sponsors to persist over time, despite the existence of competing platforms or new entrants. Drawing upon research on network effects, competitiv…	[McIntyre, David P.; Srinivasan, Arati] Providence Coll, Dept Management, 1 Cunningham Sq, Providence, RI 02918 USA; [Chintakananda, Asda] Natl Inst Dev Adm, 118 Moo 3,Serithai Road, Bangkok 10240, Thailand	Providence College; National Institute of Development Administration - Thailand	McIntyre, DP (corresponding author), Providence Coll, Dept Management, 1 Cunningham Sq, Providence, RI 02918 USA.	dmcinty2@providence.edu; asriniva@providence.edu; asda.chi@nida.ac.th							93	25	26	24	105	ELSEVIER SCI LTD	OXFORD	THE BOULEVARD, LANGFORD LANE, KIDLINGTON, OXFORD OX5 1GB, OXON, ENGLAND	0024-6301	1873-1872		LONG RANGE PLANN	Long Range Plan.	OCT	2021	54	5
J	Javornik, A; Duffy, K; Rokka, J; Scholz, J; Nobbs, K; Motala, A; Goldenberg, A				Javornik, Ana; Duffy, Katherine; Rokka, Joonas; Scholz, Joachim; Nobbs, Karinna; Motala, Anisa; Goldenberg, Adriana			Strategic approaches to augmented reality deployment by luxury brands	JOURNAL OF BUSINESS RESEARCH			English	Article						Luxury brand; Augmented reality; Brand equity; Customer journey; Brand experience; Strategic approaches	SOCIAL MEDIA; EXPERIENCE; INNOVATION; EQUITY; WORLD	Luxury brands' pioneering digital strategies now incorporate augmented reality (AR), which offers new opportunities thanks to AR unique characteristics. Luxury brands differ from other brands in their specific attributes, such as authenticity, exclusivity, hedonism, and aesthetic expression. This research investigates how AR characteristics can support luxury brands by drawing on illustrative cas…	[Javornik, Ana] Univ Bristol, Sch Management, Queens Ave, Bristol BS8 1TU, Avon, England; [Duffy, Katherine] Univ Glasgow, Adam Smith Business Sch, Gilbert Scott Bldg, Glasgow G12 8QQ, Lanark, Scotland; [Rokka, Joonas] EMLYON Business Sch, Lifestyle Res Ctr, 23 Ave Guy Collongue, F-69130 Ecully, France; [Scholz, Joachim] Brock Univ, Goodman Sch Business, St Catharines, ON L2S 3A1, Canada; [Nobbs,…	University of Bristol; University of Glasgow; EMLYON Business School; Brock University; heSam Universite; ESCP Business School	Javornik, A (corresponding author), Univ Bristol, Sch Management, Queens Ave, Bristol BS8 1TU, Avon, England.	ana.javornik@bristol.ac.uk; katherine.duffy@glasgow.ac.uk; rokka@em-lyon.com; jscholz@brocku.ca; knobbs@escpeurope.eu; anisa.motala@holition.com; adriana.goldenberg@holition.com		Javornik, Ana/0000-0002-3230-6405	Adam Smith Business School - University of Glasgow; Newcastle University Business School	Adam Smith Business School - University of Glasgow; Newcastle University Business School	The authors wish to thank the agency Holition, especially Dr Ana Maria Moutinho and Jonathan Chippindale, CEO, for their invaluable support of this study. They also gratefully acknowledge the support from Adam Smith Business School - University of Glasgow and Newcastle University Business School. The authors are very grateful to the managers and experts who took part in the interviews and shared …		58	25	25	16	63	ELSEVIER SCIENCE INC	NEW YORK	STE 800, 230 PARK AVE, NEW YORK, NY 10169 USA	0148-2963	1873-7978		J BUS RES	J. Bus. Res.	NOV	2021	136
J	Ribeiro, SPM				Ribeiro, Sandra P. M.			Developing intercultural awareness using digital storytelling	LANGUAGE AND INTERCULTURAL COMMUNICATION			English	Article						Digital storytelling; HE; intercultural awareness; student engagement; technology-enhanced learning	STORY; SKILLS	Higher Education mirrors the shifting nature of society and work. Mobility may provide unparalleled learning opportunities for all stakeholders; however, in order to live and work in plural societies as socially responsible and intercultural knowledgeable citizens, intercultural awareness and intercultural communication skills need to be mastered. In parallel, the relevance of a digital agenda an…	[Ribeiro, Sandra P. M.] Polytech Porto, CEI CICE, Sch Accounting & Adm Oporto, Sao Mamede de Infesta, Portugal	Instituto Politecnico do Porto	Ribeiro, SPM (corresponding author), Polytech Porto, CEI CICE, Sch Accounting & Adm Oporto, Sao Mamede de Infesta, Portugal.	sribeiro@iscap.ipp.pt	Ribeiro, Sandra Patrícia Marques/AAC-1057-2022; Ribeiro, Sandra/IVH-4691-2023	Ribeiro, Sandra Patrícia Marques/0000-0002-6767-0151; Ribeiro, Sandra/0000-0002-6767-0151					63	25	25	3	87	ROUTLEDGE JOURNALS, TAYLOR & FRANCIS LTD	ABINGDON	4 PARK SQUARE, MILTON PARK, ABINGDON OX14 4RN, OXFORDSHIRE, ENGLAND	1470-8477	1747-759X		LANG INTERCULT COMM	Lang. Intercult. Commun.	JAN 2	2016	16	1
J	Kontu, H; Vecchi, A				Kontu, Hanna; Vecchi, Alessandra			Why all that noise - assessing the strategic value of social media for fashion brands	JOURNAL OF GLOBAL FASHION MARKETING			English	Article						fashion; strategic marketing; digital strategy; social media; Facebook		The importance of social media is evident, as millions of people use it to connect with others, share content and discuss different topics. Although it is clear that social media is powerful and ubiquitous, many fashion brands have been reluctant or unable to develop strategies and allocate resources to effectively engage with the new media. Adopting an exploratory approach, our study provides a …	[Kontu, Hanna; Vecchi, Alessandra] Univ Arts, London Coll Fash, London, England	University of Arts London	Kontu, H (corresponding author), Univ Arts, London Coll Fash, London, England.	h.kontu@fashion.arts.ac.uk		vecchi, alessandra/0000-0003-3449-7927					57	25	25	0	16	ROUTLEDGE JOURNALS, TAYLOR & FRANCIS LTD	ABINGDON	2-4 PARK SQUARE, MILTON PARK, ABINGDON OX14 4RN, OXON, ENGLAND	2093-2685	2325-4483		J GLOB FASH MARK	J. Glob. Fash. Mark.		2014	5	3
J	Komninos, N				Komninos, Nicos			Smart environments and smart growth: connecting innovation strategies and digital growth strategies	INTERNATIONAL JOURNAL OF KNOWLEDGE-BASED DEVELOPMENT			English	Article						innovation strategy; smart specialisation; digital strategy; digital innovation; innovation system; cyber-physical system; co-design	KNOWLEDGE; SPECIALIZATION; CREATION; VALLEY; EUROPE	This paper discusses the interface between innovation systems and digital systems. It is based on a literature review that examines how innovation and smart environments converge from the bottom up, and how innovation strategies and digital strategies are connected and shape a common set of objectives and actions for growth. Following an introduction which looks at the current outlook for growth,…	[Komninos, Nicos] Aristotle Univ Thessaloniki, URENIO Res, Thessaloniki 54124, Greece	Aristotle University of Thessaloniki	Komninos, N (corresponding author), Aristotle Univ Thessaloniki, URENIO Res, Thessaloniki 54124, Greece.	komninos@urenio.org	Komninos, Nicos/ABW-3374-2022	Komninos, Nicos/0000-0002-4656-1263					93	24	24	0	26	INDERSCIENCE ENTERPRISES LTD	GENEVA	WORLD TRADE CENTER BLDG, 29 ROUTE DE PRE-BOIS, CASE POSTALE 856, CH-1215 GENEVA, SWITZERLAND	2040-4468	2040-4476		INT J KNOWL-BASED DE	Int. J. Knowl.-Based Dev.		2016	7	3
J	Phelps, LW; Ackerman, JM				Phelps, Louise Wetherbee; Ackerman, John M.			Making the Case for Disciplinarity in Rhetoric, Composition, and Writing Studies: The Visibility Project	COLLEGE COMPOSITION AND COMMUNICATION			English	Article								In the Visibility Project, professional organizations have worked to gain recognition for the disciplinarity of writing and rhetoric studies through representation of the field in the information codes and databases of higher education. We report success in two important cases: recognition as an emerging field in the National Research Council's taxonomy of research disciplines; and the assignment…	[Phelps, Louise Wetherbee] Syracuse Univ, Syracuse, NY 13244 USA; [Ackerman, John M.] Univ Colorado, Boulder, CO 80309 USA	Syracuse University; University of Colorado System; University of Colorado Boulder	Phelps, LW (corresponding author), Old Dominion Univ, Norfolk, VA 23529 USA.								20	24	25	0	4	NATL COUNCIL TEACHERS ENGLISH	URBANA	1111 KENYON RD, URBANA, IL 61801 USA	0010-096X			COLL COMPOS COMMUN	Coll. Compost. Commun.	SEP	2010	62	1
J	Rich, E; Miah, A; Lewis, S				Rich, Emma; Miah, Andy; Lewis, Sarah			Is digital health care more equitable? The framing of health inequalities within England's digital health policy 2010-2017	SOCIOLOGY OF HEALTH & ILLNESS			English	Article						E-health; Health Policy; Healthism; Internet; Social determinants of health; Youth	ENGLISH STRATEGY; REFLECTIONS; RESEARCHERS; PEOPLE; SELF; UK	Informed by a discourse analysis, this article examines the framing of equity within the UK's digital health policies between 2010 and 2017, focusing on England's development of NHS Digital and its situation within the UK Government's wider digital strategy. Analysis of significant policy documents reveals three interrelated discourses that are engaged within England's digital health policies: eq…	[Rich, Emma; Lewis, Sarah] Univ Bath, Dept Hlth, Bath, Avon, England; [Miah, Andy] Univ Salford, Sch Environm & Life Sci, Salford, Lancs, England	University of Bath; University of Salford	Rich, E (corresponding author), Univ Bath, Dept Educ, Bath, Avon, England.	E.Rich@bath.ac.uk	Miah, Andy/C-1467-2015	Miah, Andy/0000-0003-0137-674X	Wellcome Trust: 'The digital health generation: The impact of 'healthy lifestyle' technologies on young people's learning, identities and health practices' [203254/Z/16/Z]; Wellcome Trust [203254/Z/16/Z] Funding Source: Wellcome Trust	Wellcome Trust: 'The digital health generation: The impact of 'healthy lifestyle' technologies on young people's learning, identities and health practices'(Wellcome Trust); Wellcome Trust(Wellcome Trust)	This work was supported by a grant from the Wellcome Trust: 'The digital health generation: The impact of 'healthy lifestyle' technologies on young people's learning, identities and health practices' reference number: 203254/Z/16/Z.		66	23	23	6	45	WILEY	HOBOKEN	111 RIVER ST, HOBOKEN 07030-5774, NJ USA	0141-9889	1467-9566		SOCIOL HEALTH ILL	Sociol. Health Ill.	OCT	2019	41
J	Orton, M; Agarwal, S; Muhoza, P; Vasudevan, L; Vu, A				Orton, Maeghan; Agarwal, Smisha; Muhoza, Pierre; Vasudevan, Lavanya; Vu, Alexander			Strengthening Delivery of Health Services Using Digital Devices	GLOBAL HEALTH-SCIENCE AND PRACTICE			English	Article							RANDOMIZED CONTROLLED-TRIAL; MOBILE PHONE; IMPROVE ATTENDANCE; MHEALTH STRATEGIES; MESSAGING SERVICE; REMOTE AREAS; PRIMARY-CARE; TEXT; TOOL; SUPPORT	Background: Delivery of high-quality efficient health services is a cornerstone of the global agenda to achieve universal health coverage. According to the World Health Organization, health service delivery is considered good when equitable access to a comprehensive range of high-quality health services is ensured within an integrated and person-centered continuum of care. However, good health se…	[Orton, Maeghan] WHO, Dept Reprod Hlth & Res, Geneva, Switzerland; [Agarwal, Smisha] Johns Hopkins Global Digital Hlth Initiat, Baltimore, MD USA; [Muhoza, Pierre; Vu, Alexander] Johns Hopkins Bloomberg Sch Publ Hlth, Baltimore, MD USA; [Vasudevan, Lavanya] Duke Univ, Sch Med, Dept Community & Family Med, Durham, NC 27710 USA; [Vasudevan, Lavanya] Duke Global Hlth Inst, Ctr Hlth Policy & Inequal …	World Health Organization; Johns Hopkins University; Johns Hopkins Bloomberg School of Public Health; Duke University; Duke University; Johns Hopkins University; Johns Hopkins Medicine; American University of Beirut	Vasudevan, L (corresponding author), Duke Univ, Sch Med, Dept Community & Family Med, Durham, NC 27710 USA.;Vasudevan, L (corresponding author), Duke Global Hlth Inst, Ctr Hlth Policy & Inequal Res, Durham, NC 27710 USA.	Lavanya.vasude@gmail.com	Vasudevan, Lavanya/AAI-9590-2021	Vasudevan, Lavanya/0000-0003-2900-6070; Agarwal, Smisha/0000-0002-7407-0066	Aetna Foundation; World Health Organization; Johns Hopkins University Global mHealth Initiative; National Center for Advancing Translational Sciences of the National Institutes of Health [1KL2TR002554]	Aetna Foundation; World Health Organization(World Health Organization); Johns Hopkins University Global mHealth Initiative; National Center for Advancing Translational Sciences of the National Institutes of Health(United States Department of Health & Human ServicesNational Institutes of Health (NIH) - USANIH National Center for Advancing Translational Sciences (NCATS))	This work was made possible by a grant from the Aetna Foundation, with support from the World Health Organization and The Johns Hopkins University Global mHealth Initiative. In addition, Vasudevan's effort on this publication was supported in part by the National Center for Advancing Translational Sciences of the National Institutes of Health under Award Number 1KL2TR002554.		69	23	26	0	4	JOHNS HOPKINS CENTER COMMUNICATION PROGRAMS-CCP	BALTIMORE	KNOWLEDGE SUCCESS PROJECT, 111 MARKET PLACE, STE 310, BALTIMORE, MD, UNITED STATES	2169-575X			GLOB HEALTH-SCI PRAC	Glob. Health	OCT 10	2018	6
J	Pérez, EG				Guerrero Perez, Enrique			Millennials' abandonment of linear television	REVISTA LATINA DE COMUNICACION SOCIAL			Spanish	Article						Television; Internet; audiences; audiovisual media consumption; millennials	YOUTUBE; TV	Introduction. Television is undergoing a historical transformation due to its convergence with the Internet and the disruptiveness of technological innovation. Methods. This article analyses the evolution of linear television consumption by the so-called millennial generation, in comparison to the general audience, and how it is affected by online viewing. This research also addresses millennials…	[Guerrero Perez, Enrique] Univ Navarra, Pamplona, Spain	University of Navarra	Pérez, EG (corresponding author), Univ Navarra, Pamplona, Spain.	eguerrero@unav.es	Guerrero, Enrique/I-7038-2016	Guerrero, Enrique/0000-0001-7693-8669					31	23	23	3	24	LABORATORIO TECNOLOGIAS INFORMACION & NUEVOS ANALISIS COMUNICACION SOCIAL	TENERIFE	PIRAMIDE CAMPUS GUAJARA, LA LAGUNA, TENERIFE, 38200, SPAIN	1138-5820			REV LAT COMUN SOC	Rev. Lat. Comun. Soc.		2018	73	12
J	Noehrer, L; Gilmore, A; Jay, C; Yehudi, Y				Noehrer, Lukas; Gilmore, Abigail; Jay, Caroline; Yehudi, Yo			The impact of COVID-19 on digital data practices in museums and art galleries in the UK and the US	HUMANITIES & SOCIAL SCIENCES COMMUNICATIONS			English	Article								The first quarter of 2020 heralded the beginning of an uncertain future for museums and galleries as the COVID-19 pandemic hit and the only means to stay 'open' was to turn towards the digital. In this paper, we investigate how the physical closure of museum buildings due to lockdown restrictions caused shockwaves within their digital strategies and changed their data practices potentially for go…	[Noehrer, Lukas; Gilmore, Abigail; Jay, Caroline; Yehudi, Yo] Univ Manchester, Manchester, Lancs, England	University of Manchester	Noehrer, L (corresponding author), Univ Manchester, Manchester, Lancs, England.	lukas.noehrer@manchester.ac.uk	Noehrer, Lukas/AHB-1229-2022; Gilmore, Abigail/JMB-2510-2023	Noehrer, Lukas/0000-0002-9167-0397; Gilmore, Abigail/0000-0003-0596-6667; Yehudi, Yo/0000-0003-2705-1724; Jay, Caroline/0000-0002-6080-1382	UK Engineering and Physical Sciences Research Council (EPSRC) [EP/R513131/1]; AHRC/UKRI COVID-19: Impacts on the Cultural Industries and Implications for Policy [AH/V00994X/1]; AHRC Centre of Excellence for Policy and Evidence in the Creative Industries [AH/S001298/1]; AHRC [AH/V00994X/1, AH/S012893/1] Funding Source: UKRI	UK Engineering and Physical Sciences Research Council (EPSRC)(UK Research & Innovation (UKRI)Engineering & Physical Sciences Research Council (EPSRC)); AHRC/UKRI COVID-19: Impacts on the Cultural Industries and Implications for Policy; AHRC Centre of Excellence for Policy and Evidence in the Creative Industries; AHRC(UK Research & Innovation (UKRI)Arts & Humanities Research Council (AHRC))	This work was supported by the UK Engineering and Physical Sciences Research Council (EPSRC) grant EP/R513131/1 for the University of Manchester and we further acknowledge funding for Gilmore from AHRC/UKRI COVID-19: Impacts on the Cultural Industries and Implications for Policy (AH/V00994X/1) and AHRC Centre of Excellence for Policy and Evidence in the Creative Industries (AH/S001298/1). We woul…		47	22	22	1	19	SPRINGERNATURE	LONDON	CAMPUS, 4 CRINAN ST, LONDON, N1 9XW, ENGLAND		2662-9992		HUM SOC SCI COMMUN	Hum. Soc. Sci. Commun.	OCT 15	2021	8	1
J	Rane, SB; Narvel, YAM; Bhandarkar, BM				Rane, Santosh B.; Narvel, Yahya Abdul Majid; Bhandarkar, Bhaskar M.			Developing strategies to improve agility in the project procurement management (PPM) process Perspective of business intelligence (BI)	BUSINESS PROCESS MANAGEMENT JOURNAL			English	Article						Delphi; Agility; Business intelligence; Interpretive structural modelling; MICMAC; Project procurement management	SUPPLY CHAIN MANAGEMENT; MEDICAL DEVICE DEVELOPMENT; GREEN; PERFORMANCE; IMPACT; FLEXIBILITY; BARRIERS; RANKING; SUPPORT; SYSTEMS	Purpose The ability of an organization to observe varying demands and efficiently meet them can be described as agility. Project procurement management (PPM) in the past was stable as things did not change very often and were very predictable. Due to hyper-competition, less predictable market and exponential innovation, the existing PPM becomes very unstable which marks the requirement of an agil…	[Rane, Santosh B.; Narvel, Yahya Abdul Majid] Sardar Patel Coll Engn, Dept Mech Engn, Mumbai, Maharashtra, India; [Narvel, Yahya Abdul Majid] Larsen & Toubro Infotech Ltd, Digital Solut, Oracle Practice, Mumbai, Maharashtra, India; [Bhandarkar, Bhaskar M.] Indian Inst Ind Engn, Mumbai, Maharashtra, India		Narvel, YAM (corresponding author), Sardar Patel Coll Engn, Dept Mech Engn, Mumbai, Maharashtra, India.;Narvel, YAM (corresponding author), Larsen & Toubro Infotech Ltd, Digital Solut, Oracle Practice, Mumbai, Maharashtra, India.	yahyanarvel@gmail.com	Rane, Santosh Bhagawat/AAQ-5960-2021	Rane, Santosh Bhagawat/0000-0003-0636-2048					116	22	22	7	88	EMERALD GROUP PUBLISHING LTD	BINGLEY	HOWARD HOUSE, WAGON LANE, BINGLEY BD16 1WA, W YORKSHIRE, ENGLAND	1463-7154	1758-4116		BUS PROCESS MANAG J	Bus. Process. Manag. J.	SEP 2	2019	26	1
J	Zhou, N; Zhang, SX; Chen, JE; Han, XT				Zhou, Ning; Zhang, Sixuan; Chen, Jing (Elaine); Han, Xiaoting			The role of information technologies (ITs) in firms' resource orchestration process: A case analysis of China's Huangshan 168	INTERNATIONAL JOURNAL OF INFORMATION MANAGEMENT			English	Article						Resource orchestration process; Information technologies; Low-tech industries		This case analysis considers how digital disruption is reaching beyond technology to engulf traditionally considered low-tech industries and influence conventionally viewed non-digital businesses. For incumbent firms in these low-tech industries, the disruption brings not only plenty of opportunities but also numerous threats. Firms that quickly embrace the digital era by profoundly changing thei…	[Zhou, Ning; Zhang, Sixuan; Chen, Jing (Elaine); Han, Xiaoting] Beihang Univ, Sch Econ & Management, 37 Xueyuan Rd, Beijing 100191, Peoples R China	Beihang University	Zhang, SX (corresponding author), Beihang Univ, Sch Econ & Management, 37 Xueyuan Rd, Beijing 100191, Peoples R China.	zning80@buaa.edu.cn; sixuan.zhang@gmail.com; jechen@buaa.edu.cn; hanxiaoting@buaa.edu.cn		Chen, Jing (Elaine)/0000-0002-3140-1881; Han, Xiaoting/0000-0002-7328-4716					5	22	23	6	68	ELSEVIER SCI LTD	OXFORD	THE BOULEVARD, LANGFORD LANE, KIDLINGTON, OXFORD OX5 1GB, OXON, ENGLAND	0268-4012	1873-4707		INT J INFORM MANAGE	Int. J. Inf. Manage.	DEC	2017	37	6
J	Schallmo, D; Williams, CA; Lohse, J				Schallmo, Daniel; Williams, Christopher A.; Lohse, Jochen			DIGITAL STRATEGY - INTEGRATED APPROACH AND GENERIC OPTIONS	INTERNATIONAL JOURNAL OF INNOVATION MANAGEMENT			English	Article						Digital strategy; digital transformation; digital transformation strategy; digitisation; business model	RESOURCE-BASED VIEW; DYNAMIC CAPABILITIES; COMPETITIVE ADVANTAGE	The purpose of this paper is to develop an integrated approach for a digital strategy including generic options. Our research is based on our previous contribution in which we have analysed and compared existing approaches on digital strategy. We expanded this research by conducting 13 semi-structured interviews to gain insights from experts on digital strategy (researchers and consultants). We a…	[Schallmo, Daniel] Neu Ulm Univ Appl Sci, Wileystr 1, D-89231 Neu Ulm, Germany; [Williams, Christopher A.] Johannes Kepler Univ Linz, Altenbergerstr 69, A-4040 Linz, Austria; [Lohse, Jochen] Hoppe Marine GmbH, Kieler Str 318, D-22525 Hamburg, Germany	Johannes Kepler University Linz	Schallmo, D (corresponding author), Neu Ulm Univ Appl Sci, Wileystr 1, D-89231 Neu Ulm, Germany.	daniel.schallmo@hs-neu-ulm.de; chrs.a.williams@gmail.com; jochen.lohse.mba16a@nordakademie.org	Williams, Christopher/GQQ-9115-2022	Schallmo, Daniel/0000-0002-4221-001X					71	21	21	10	100	WORLD SCIENTIFIC PUBL CO PTE LTD	SINGAPORE	5 TOH TUCK LINK, SINGAPORE 596224, SINGAPORE	1363-9196	1757-5877		INT J INNOV MANAG	Int. J. Innov. Manag.	DEC	2019	23	8
J	Nayak, B; Bhattacharyya, SS; Krishnamoorthy, B				Nayak, Bishwajit; Bhattacharyya, Som Sekhar; Krishnamoorthy, Bala			Application of digital technologies in health insurance for social good of bottom of pyramid customers in India	INTERNATIONAL JOURNAL OF SOCIOLOGY AND SOCIAL POLICY			English	Article						Bottom of pyramid; Risk management; Digital technology; Social policy; Social health insurance	ARTIFICIAL-INTELLIGENCE; BIG DATA; CARE; CHALLENGES; ADOPTION; SERVICES; IMPACT; ADULTS	Purpose Social health insurance framework of any country is the national identifier of the country's policy for taking care of its population which cannot access or afford quality healthcare. The purpose of this paper is to highlight the strategic imperatives of digital technology for the inclusive social health models for the BoP customers. Design/methodology/approach A qualitative exploratory s…	[Nayak, Bishwajit; Krishnamoorthy, Bala] Narsee Monjee Inst Management Studies Univ, Sch Business Management, Mumbai, Maharashtra, India; [Bhattacharyya, Som Sekhar] Natl Inst Ind Engn, Dept Strateg Management, Mumbai, Maharashtra, India	SVKM's NMIMS (Deemed to be University); National Institute of Industrial Engineering (NITIE)	Nayak, B (corresponding author), Narsee Monjee Inst Management Studies Univ, Sch Business Management, Mumbai, Maharashtra, India.	bnayak0107@gmail.com	Nayak, Bishwajit/G-5193-2018; Bhattacharyya, Som Sekhar/AAJ-5749-2020	Bhattacharyya, Som Sekhar/0000-0003-3259-0319					110	21	22	1	18	EMERALD GROUP PUBLISHING LTD	BINGLEY	HOWARD HOUSE, WAGON LANE, BINGLEY BD16 1WA, W YORKSHIRE, ENGLAND	0144-333X	1758-6720		INT J SOCIOL SOC POL	Int. J. Sociol. Soc. Policy	SEP 9	2019	39	9-10
J	Trzaska, R; Sulich, A; Organa, M; Niemczyk, J; Jasinski, B				Trzaska, Rafal; Sulich, Adam; Organa, Michal; Niemczyk, Jerzy; Jasinski, Bartosz			Digitalization Business Strategies in Energy Sector: Solving Problems with Uncertainty under Industry 4.0 Conditions	ENERGIES			English	Article						business models; digital revolution; energy sector transformation; Hellwig's method; Industry 4; 0; literature review; strategic management	SUSTAINABLE DEVELOPMENT; CIRCULAR ECONOMY; MODEL; INNOVATION; DIGITIZATION; TECHNOLOGIES; ATTRIBUTES; PREDICTION; EFFICIENCY; CONTEXT	Digital transformation is a concept based on the use of digitalization and digitization. Digitalization leads to change of business models and provides a competitive advantage also in the energy sector. The process of change towards a digital business requires a specific strategy type, aimed to solve problems with uncertainty caused by Industry 4.0 implementation. This paper aims to propose a the…	[Trzaska, Rafal; Organa, Michal; Niemczyk, Jerzy; Jasinski, Bartosz] Wroclaw Univ Econ & Business, Dept Strategy & Management Methods, Fac Management, Ul Komandorska 118-120, PL-53345 Wroclaw, Poland; [Sulich, Adam] Wroclaw Univ Econ & Business, Dept Adv Res Management, Fac Management, Ul Komandorska 118-120, PL-53345 Wroclaw, Poland	Wroclaw University of Economics & Business; Wroclaw University of Economics & Business	Trzaska, R (corresponding author), Wroclaw Univ Econ & Business, Dept Strategy & Management Methods, Fac Management, Ul Komandorska 118-120, PL-53345 Wroclaw, Poland.;Sulich, A (corresponding author), Wroclaw Univ Econ & Business, Dept Adv Res Management, Fac Management, Ul Komandorska 118-120, PL-53345 Wroclaw, Poland.	adam.sulich@ue.wroc.pl; jerzy.niemczyk@ue.wroc.pl	Niemczyk, Jerzy/R-5727-2018; Sulich, Adam/M-7935-2019	Niemczyk, Jerzy/0000-0002-0766-3929; Sulich, Adam/0000-0001-8841-9102	National Science Centre in Poland [2019/33/N/HS4/02957]; Ministry of Science and Higher Education in Poland [015/RID/2018/19]	National Science Centre in Poland(National Science Centre, Poland); Ministry of Science and Higher Education in Poland(Ministry of Science and Higher Education, Poland)	(A.S.) The project is financed by the National Science Centre in Poland under the program Business Ecosystem of the Environmental Goods and Services Sector in Poland, implemented in 2020-2022; project number 2019/33/N/HS4/02957; total funding amount PLN 120,900.00. (A.S., R.T, M.O., B.J, and J.N.) The project is financed by the Ministry of Science and Higher Education in Poland under the program …		151	20	20	8	57	MDPI	BASEL	ST ALBAN-ANLAGE 66, CH-4052 BASEL, SWITZERLAND		1996-1073		ENERGIES	Energies	DEC	2021	14	23
J	Shahi, C; Sinha, M				Shahi, Chinmay; Sinha, Manish			Digital transformation: challenges faced by organizations and their potential solutions	INTERNATIONAL JOURNAL OF INNOVATION SCIENCE			English	Article						Change management; Technology; Digital transformation; Digital strategy		Purpose Digital transformation is the way forward for all businesses. The technology is advancing at a rapid pace and the companies need to adapt to the change, not just to take advantage of the enormous opportunities it provides but even to stay relevant in this volatility, uncertainty, complexity, and ambiguity world. This study aims to define the concept of digital transformation and what it m…	[Shahi, Chinmay; Sinha, Manish] SIU SCMHRD, Pune, Maharashtra, India	Symbiosis International University; Symbiosis Centre for Management & Human Resource Development (SCMHRD)	Shahi, C (corresponding author), SIU SCMHRD, Pune, Maharashtra, India.	chinmay_shahi@scmhrd.edu		SINHA, MANISH/0000-0002-2116-0877					44	20	20	9	140	EMERALD GROUP PUBLISHING LTD	BINGLEY	HOWARD HOUSE, WAGON LANE, BINGLEY BD16 1WA, W YORKSHIRE, ENGLAND	1757-2223	1757-2231		INT J INOV SCI	Int. J. Innov. Sci.	JAN 21	2021	13	1
J	Foster, C; Azmeh, S				Foster, Christopher; Azmeh, Shamel			Latecomer Economies and National Digital Policy: An Industrial Policy Perspective	JOURNAL OF DEVELOPMENT STUDIES			English	Article; Early Access							COMPARATIVE ADVANTAGE; VALUE CHAINS; TRADE; CHINA; MODEL; RISE	The global economy is experiencing digital transformation with impacts felt in developing countries. Digital firms and capabilities, however, remain concentrated in advanced economies. These processes indicate an emerging source of global economic inequality and a widening of the technological gap. Recently, there has been a growth in interventionist digital policy in developing and emerging econ…	[Foster, Christopher; Azmeh, Shamel] Univ Manchester, Global Dev Inst, Manchester, Lancs, England	University of Manchester	Foster, C (corresponding author), Univ Manchester, Arthur Lewis Bldg,Oxford Rd, Manchester M13 9PL, Lancs, England.	christopher.foster-2@manchester.ac.uk		Foster, Christopher/0000-0001-7827-2485	Sheffield Institute of International Development (SIID); Information School, University of Sheffield	Sheffield Institute of International Development (SIID); Information School, University of Sheffield	The paper was supported by small grants from The Sheffield Institute of International Development (SIID) and the Information School, University of Sheffield. The authors would like to thank research assistant Yaming Fu for her work on compiling, collating and translating Chinese digital policy material used in this paper. Additional thanks to Jaime Echavarri-Valdez for insightful comments and inp…		90	20	21	14	129	ROUTLEDGE JOURNALS, TAYLOR & FRANCIS LTD	ABINGDON	2-4 PARK SQUARE, MILTON PARK, ABINGDON OX14 4RN, OXON, ENGLAND	0022-0388	1743-9140		J DEV STUD	J. Dev. Stud.	2019 NOV 2	2019
J	Powers, M				Powers, Matthew			NGO Publicity and Reinforcing Path Dependencies: Explaining the Persistence of Media-Centered Publicity Strategies	INTERNATIONAL JOURNAL OF PRESS-POLITICS			English	Article						advocacy; civil society; global news; new institutionalism	HUMAN-RIGHTS NGOS; HUMANITARIAN; ORGANIZATIONS; JOURNALISM; SPACES; GATES; NEWS	Previous research finds that nongovernmental organization (NGO) publicity strategiesdespite digital technologiescontinue to focus heavily on garnering coverage in the mainstream news media. Drawing on theories of path dependence and interviews with NGO professionals, this paper identifies three factors that explain why this should be so. First, donors continue to value media coverage as a platfor…	[Powers, Matthew] Univ Washington, Dept Commun, Box 353740, Seattle, WA 98195 USA	University of Washington; University of Washington Seattle	Powers, M (corresponding author), Univ Washington, Dept Commun, Box 353740, Seattle, WA 98195 USA.	powers.mj@gmail.com							40	20	20	0	40	SAGE PUBLICATIONS INC	THOUSAND OAKS	2455 TELLER RD, THOUSAND OAKS, CA 91320 USA	1940-1612	1940-1620		INT J PRESS/POLIT	Int. J. Press-Polit.	OCT	2016	21	4
J	Senna, PP; Ferreira, LMDF; Barros, AC; Roca, JB; Magalhaes, V				Senna, Pedro P.; Ferreira, Luis Miguel D. F.; Barros, Ana C.; Roca, Jaime Bonnin; Magalhaes, Vanessa			Prioritizing barriers for the adoption of Industry 4.0 technologies	COMPUTERS & INDUSTRIAL ENGINEERING			English	Article						Industry 4; 0; Barriers; Technology adoption; Interpretive structural modelling	FUTURE; INTERNET; THINGS; IMPLEMENTATION; MODEL; DETERMINANTS; CHALLENGES; LOGISTICS; ANALYTICS; COMPANIES	While Industry 4.0 promises large technological improvements, firms face multiple challenges in its adoption. Current literature has made significant efforts to identify the barriers which are common to most companies but fails to identify their interrelationships and their implications for practitioners. We use interpretive structural modelling (ISM) methodology to identify these barriers and th…	[Senna, Pedro P.] Univ Porto, Fac Engn, Rua Dr Roberto Frias, P-4200465 Porto, Portugal; [Senna, Pedro P.; Barros, Ana C.] Campus FEUP, Ctr Enterprise Syst Engn, INESC TEC, Rua Dr Roberto Frias, P-4200465 Porto, Portugal; [Ferreira, Luis Miguel D. F.; Magalhaes, Vanessa] Univ Coimbra, Dept Mech Engn, CEMMPRE, Coimbra, Portugal; [Roca, Jaime Bonnin] Eindhoven Univ Technol, Dept Ind Engn & Innovat …	Universidade do Porto; Universidade do Porto; INESC TEC; Universidade de Coimbra; Eindhoven University of Technology; Universidade do Porto; INESC TEC	Senna, PP (corresponding author), Campus FEUP, INESC TEC, Rua Dr Roberto Frias S-N, P-4200465 Porto, Portugal.	pedro.senna@inesctec.pt; luis.ferreira@dem.uc.pt; abarros2222@gmail.com; j.bonnin.roca@tue.nl; vanessa.magalhaes@dem.uc.pt	Magalhães, Vanessa Sofia Melo/GZL-2926-2022; Roca, Jaime/AAK-3477-2021; Senna, Pedro Pinho/GRS-5705-2022; Ferreira, Luis/H-3046-2016	Magalhães, Vanessa Sofia Melo/0000-0002-5265-8555; Roca, Jaime/0000-0003-4244-0357; Senna, Pedro Pinho/0000-0002-4025-5716; Ferreira, Luis/0000-0003-0459-0020	FEDER funds; National Funds, National Funds through the Portuguese funding agency	FEDER funds(European Union (EU)); National Funds, National Funds through the Portuguese funding agency	This research is supported by FEDER funds through the program COMPETE - Programa Operacional Factores de Competitividade. This work was financed by National Funds through the Portuguese funding agency, FCT - Fundacao para a Ciencia e a Tecnologia, within project UIDB/50014/2020.		90	19	19	6	12	PERGAMON-ELSEVIER SCIENCE LTD	OXFORD	THE BOULEVARD, LANGFORD LANE, KIDLINGTON, OXFORD OX5 1GB, ENGLAND	0360-8352	1879-0550		COMPUT IND ENG	Comput. Ind. Eng.	SEP	2022	171
J	Gajdzik, B; Wolniak, R				Gajdzik, Bozena; Wolniak, Radoslaw			Digitalisation and Innovation in the Steel Industry in Poland-Selected Tools of ICT in an Analysis of Statistical Data and a Case Study	ENERGIES			English	Article						Industry 4; 0; steel industry; digitalisation	SUPPLY CHAIN; THINGS IOT; SYSTEM; IDENTIFICATION; MAINTENANCE; INTERNET; FUTURE; ENTERPRISE; MANAGEMENT; FRAMEWORK	Digital technologies enable companies to build cyber-physical systems (CPS) in Industry 4.0. In the increasingly popular concept of Industry 4.0, an important research topic is the application of digital technology in industry, and in particular in specific industry sectors. The aim of this paper is to present the tools used in the steel industry in Poland on its way to the full digitalisation th…	[Gajdzik, Bozena] Silesian Tech Univ, Dept Ind Informat, PL-40019 Katowice, Poland; [Wolniak, Radoslaw] Silesian Tech Univ, Dept Management & Org, PL-41800 Zabrze, Poland	Silesian University of Technology; Silesian University of Technology	Gajdzik, B (corresponding author), Silesian Tech Univ, Dept Ind Informat, PL-40019 Katowice, Poland.	bozena.gajdzik@polsl.pl; radoslaw.wolniak@polsl.pl	Gajdzik, Bozena/S-8265-2018; Wolniak, Radoslaw/P-7146-2017	Gajdzik, Bozena/0000-0002-0408-1691; Wolniak, Radoslaw/0000-0003-0317-9811	Department of Industrial Informatics, Silesian University of Technology [11/990/BK_21/0080]	Department of Industrial Informatics, Silesian University of Technology	Department of Industrial Informatics, Silesian University of Technology supported this work as a part of Statutory Research 11/990/BK_21/0080.		133	19	19	5	21	MDPI	BASEL	ST ALBAN-ANLAGE 66, CH-4052 BASEL, SWITZERLAND		1996-1073		ENERGIES	Energies	JUN	2021	14	11
J	Stewart, K; Kammer-Kerwick, M; Auchter, A; Koh, HE; Dunn, ME; Cunningham, I				Stewart, Kristin; Kammer-Kerwick, Matt; Auchter, Allison; Koh, Hyeseung Elizabeth; Dunn, Mary Elizabeth; Cunningham, Isabella			Examining digital video advertising (DVA) effectiveness The role of product category, product involvement, and device	EUROPEAN JOURNAL OF MARKETING			English	Article						Experimental design; Product involvement; Device type; Digital video advertising; Search intentions	CONSUMER INVOLVEMENT; RESPONSES; TELEVISION; UTILITARIAN; CHOICE; MODEL; WORKS; CONSUMPTION; SYNERGIES; EMOTIONS	Purpose Marketers are increasing their use of digital strategies and prioritizing digital tactics, although the effectiveness digital video advertising (DVA) has not been examined empirically. The purpose of this research is to suggest that it is useful for advertisers to consider theories of the past to understand the link between product, advertising format and message processing. Design/method…	[Stewart, Kristin] Calif State Univ, Dept Mkt, San Marcos, CA 92096 USA; [Kammer-Kerwick, Matt] Univ Texas Austin, IC2 Inst, Bur Business Res, Austin, TX 78712 USA; [Auchter, Allison] Univ Calif San Diego, Sch Med, La Jolla, CA 92093 USA; [Koh, Hyeseung Elizabeth; Dunn, Mary Elizabeth; Cunningham, Isabella] Univ Texas Austin, Stan Richards Sch Advertising & PR, Austin, TX 78712 USA	California State University System; California State University San Marcos; University of Texas System; University of Texas Austin; University of California System; University of California San Diego; University of Texas System; University of Texas Austin	Stewart, K (corresponding author), Calif State Univ, Dept Mkt, San Marcos, CA 92096 USA.	kstewart@csusm.edu; mattkk@ic2.utexas.edu; auchter@utexas.edu; kohhye@utexas.edu; marydunn.utexas@gmail.com; isabella.cunningham@austin.utexas.edu	Koh, Hye Seung/IUN-3409-2023; Stewart, Kristin/IQW-2548-2023	Koh, Hye Seung/0000-0003-4160-6984; Kammer-Kerwick, Matt/0000-0001-8848-3438	IC2 Institute at The University of Texas at Austin	IC2 Institute at The University of Texas at Austin	The authors wish to acknowledge the IC2 Institute at The University of Texas at Austin for providing the funding for this research. The authors would also like to thank the anonymous reviewers of this manuscript. Their feedback has greatly improved the organization and readability of this paper.		83	19	19	11	125	EMERALD GROUP PUBLISHING LTD	BINGLEY	HOWARD HOUSE, WAGON LANE, BINGLEY BD16 1WA, W YORKSHIRE, ENGLAND	0309-0566	1758-7123		EUR J MARKETING	Eur. J. Market.	NOV 11	2019	53	11
J	Scheepers, R; Lacity, MC; Willcocks, LP				Scheepers, Rens; Lacity, Mary C.; Willcocks, Leslie P.			Cognitive Automation as Part of Deakin University's Digital Strategy	MIS QUARTERLY EXECUTIVE			English	Article								Interest is growing in using cognitive automation (CA) tools to handle customer enquiries, but there is a dearth of cases that illustrate best practice. We describe the CA journey of Deakin University, an early adopter of CA technology. Deakin, an Australian university, is using IBM Watson (an example of a question-and-answer CA application) to automate the answering of questions from students (t…	[Scheepers, Rens] Deakin Univ, Chair Informat Syst, Geelong, Vic, Australia; [Lacity, Mary C.] Univ Missouri St Louis, St Louis, MO USA; [Willcocks, Leslie P.] London Sch Econ & Polit Sci, Outsourcing Unit, Technol Work & Globalizat, London, England	Deakin University; University of Missouri System; University of Missouri Saint Louis; University of London; London School Economics & Political Science	Scheepers, R (corresponding author), Deakin Univ, Chair Informat Syst, Geelong, Vic, Australia.	rens.scheepers@deakin.edu.au; Mary.Lacity@umsl.edu; willcockslp@aol.com		Scheepers, Rens/0000-0003-2791-6513					28	19	19	0	9	INDIANA UNIV, OPER & DECISION TECHNOL DEPT	BLOOMINGTON	KELLEY SCH BUS, E 10 ST, BLOOMINGTON, IN 47405-1701 USA	1540-1960	1540-1979		MIS Q EXEC	MIS Q. Exec.	JUN	2018	17	2
J	Sánchez, MA				Analia Sanchez, Marisa			A FRAMEWORK TO ASSESS ORGANIZATIONAL READINESS FOR THE DIGITAL TRANSFORMATION	DIMENSION EMPRESARIAL			English	Article						Digital transformation; digital strategy; The Five Competitive Forces Model; Value Chain Analysis; System Dynamics	DYNAMIC CAPABILITIES; SYSTEM DYNAMICS; MANAGEMENT; STAKEHOLDERS; PERSPECTIVE; CHALLENGES; SCIENCE	The digital transformation puts to the test the sustainability of traditional business models. The aim of this research work is to formulate a framework that explains resources, capabilities and management choices necessary to respond to the new environment. The proposal based on literature review of both theoretical and empirical research. The framework abstracts complexity to isolate a few key …	[Analia Sanchez, Marisa] Univ Nacl Sur Argentina, Bahia Blanca, Argentina		Sánchez, MA (corresponding author), Univ Nacl Sur Argentina, Bahia Blanca, Argentina.	mas@uns.edu	Sanchez, Marisa A/M-6135-2014	Sanchez, Marisa A/0000-0002-8291-0491					44	19	21	1	109	UNIV AUTONOMA CARIBE-UAC	ATLANTICO	CL 90, BARRANQUILLA, ATLANTICO, 00000, COLOMBIA	1692-8563	2322-956X		DIMENS EMPRESARIAL	Dimens. Empresarial		2017	15	2
J	Siokas, G; Tsakanikas, A; Siokas, E				Siokas, Georgios; Tsakanikas, Aggelos; Siokas, Evangelos			Implementing smart city strategies in Greece: Appetite for success	CITIES			English	Article						Smart city; Smart urban policy; Digital tools; City planning; Smart strategy	PARTIAL LEAST-SQUARES; PLS-SEM; CITIES; GOVERNANCE; INFORMATION; TECHNOLOGY; INDICATORS; MANAGEMENT; FRAMEWORK; VARIABLES	This research paper aims at reviewing the effect of specific internal procedures undertaken in the boundaries of a municipality during the adaptation process of a Smart City strategy. By using a unique, tailor-made questionnaire and advance statistical techniques, we try to identify which factors turn to be crucial in implementing successful smart strategies. The paper maps, evaluates and analyse…	[Siokas, Georgios; Tsakanikas, Aggelos; Siokas, Evangelos] Natl Tech Univ Athens, Sch Chem Engn, Lab Ind & Energy Econ, Zografou Campus,9 Iroon Polytech Str, Zografos 15780, Greece	National Technical University of Athens	Siokas, G (corresponding author), Natl Tech Univ Athens, Sch Chem Engn, Lab Ind & Energy Econ, Zografou Campus,9 Iroon Polytech Str, Zografos 15780, Greece.	geosiok@mail.ntua.gr	Siokas, Georgios/HHN-5102-2022	Siokas, Georgios/0000-0002-7017-874X					81	18	18	1	13	ELSEVIER SCI LTD	OXFORD	THE BOULEVARD, LANGFORD LANE, KIDLINGTON, OXFORD OX5 1GB, OXON, ENGLAND	0264-2751	1873-6084		CITIES	Cities	JAN	2021	108
J	Kudyba, S; Fjermestad, J; Davenport, T				Kudyba, Stephan; Fjermestad, Jerry; Davenport, Thomas			A research model for identifying factors that drive effective decision-making and the future of work	JOURNAL OF INTELLECTUAL CAPITAL			English	Article						Collective intelligence; Cognitive technologies; Digital strategies; Knowledge systems	COLLECTIVE INTELLIGENCE; INFORMATION-TECHNOLOGY; PRODUCTIVITY; MANAGEMENT; FRAMEWORK; BUSINESS; IMPACT; TEAMS	Purpose The evolving digital transformations of organizational processes involve vast complexities. Factors such as labor resources at the individual and team levels that integrate and utilize information resources and evolving technologies to achieve collective intelligence are essential to this process. In order to better understand evolving demands of labor resources, existing research regardi…	[Kudyba, Stephan; Fjermestad, Jerry] NJIT, Newark, NJ 07102 USA; [Davenport, Thomas] Babson Coll, Wellesley, MA USA	New Jersey Institute of Technology; Babson College	Kudyba, S (corresponding author), NJIT, Newark, NJ 07102 USA.	Stephan.P.Kudyba@njit.edu; fjermestad@yahoo.com; TDavenport@babson.edu							57	18	18	1	56	EMERALD GROUP PUBLISHING LTD	BINGLEY	HOWARD HOUSE, WAGON LANE, BINGLEY BD16 1WA, W YORKSHIRE, ENGLAND	1469-1930	1758-7468		J INTELLECT CAP	J. Intellect. Cap.	NOV 9	2020	21	6
J	Mhlungu, NSM; Chen, JYJ; Alkema, P				Mhlungu, Ntandoyethu S. M.; Chen, Jeff Y. J.; Alkema, Peter			The underlying factors of a successful organisational digital transformation	SOUTH AFRICAN JOURNAL OF INFORMATION MANAGEMENT			English	Article						Digital transformation; organisational transformation; innovation; digital strategy; organisational digital transformation assessement	EXPLORATORY FACTOR-ANALYSIS; STRATEGY; PERFORMANCE; INNOVATION; GUIDE	Background: Organisational digital transformation (ODT) is a field of growing interest in practice and academia. Further, a disparity between how information technology (IT) leaders and non-IT leaders perceive the factors leading to successful ODT initiatives has been cited. A set of empirically tested ODT assessment instruments will enhance leaders' decision-making when implementing ODT initiati…	[Mhlungu, Ntandoyethu S. M.; Chen, Jeff Y. J.] Univ Pretoria, Gordon Inst Business Sci, Johannesburg, South Africa; [Alkema, Peter] First Natl Bank, Business Banking Div, Johannesburg, South Africa	University of Pretoria	Chen, JYJ (corresponding author), Univ Pretoria, Gordon Inst Business Sci, Johannesburg, South Africa.	chenj@gibs.co.za		Mhlungu, Ntandoyethu/0000-0002-1491-049X					44	18	18	12	72	AOSIS	Durbanville	Postnet Suite 110, Private Bag x 19, Durbanville, SOUTH AFRICA	2078-1865	1560-683X		S AFR J INFORM MANAG	S. Afr. J. Inform. Manag.	APR 30	2019	21	1
J	Kontic, L; Vidicki, D				Kontic, Ljiljana; Vidicki, Dorde			Strategy for Digital Organization: Testing a Measurement Tool for Digital Transformation	STRATEGIC MANAGEMENT			English	Article						Digital organization; strategy; digital dexterity; transformation; organizational culture		Proactive leadership and investment are the key factors that determine a company's potential to become a digital organization. Based on the analysis of relevant literature, we will introduce a four-stage model. The companies are progressing through stalling, initiating, engaging and self-reinforcement stage. The main research question is: How to assess an organization's readiness for digital tran…	[Kontic, Ljiljana] Union Univ Novi Sad, Fac Legal & Business Studies Dr Lazar Vrkatic, Novi Sad, Serbia; [Vidicki, Dorde] Govt Vojvodina Novi Sad, Novi Sad, Serbia		Kontic, L (corresponding author), Fac Legal & Business Studies Dr Lazar Vrkatic, Bulevar Oslobodenja 76, Novi Sad 21000, Serbia.	ljiljana.kontic@yahoo.com	Kontic, Ljiljana/GPX-1477-2022						16	18	19	24	187	UNIV NOVI SAD, FAC ECONOMICS SUBOTICA	SUBOTICA	SEGEDINSKI PUT 9-11, SUBOTICA, 24000, SERBIA	1821-3448	2334-6191		STRATEG MANAG	Strateg. Manag.		2018	23	1
J	Flew, T				Flew, Terry			Rethinking Public Service Media and Citizenship: Digital Strategies for News and Current Affairs at Australia's Special Broadcasting Service	INTERNATIONAL JOURNAL OF COMMUNICATION			English	Article								This article considers the concept of media citizenship in relation to the digital strategies of the Special Broadcasting Service (SBS). At SBS, Australia's multicultural public broadcaster, there is a critical appraisal of its strategies to harness user-created content (UCC) and social media to promote greater audience participation through its news and current affairs Web sites. The article loo…	Queensland Univ Technol, Brisbane, Qld 4001, Australia	Queensland University of Technology (QUT)	Flew, T (corresponding author), Queensland Univ Technol, Brisbane, Qld 4001, Australia.	t.flew@qut.edu.au	Flew, Terry/I-9738-2012	Flew, Terry/0000-0003-4485-9338					54	18	18	0	13	USC ANNENBERG PRESS	LOS ANGELES	UNIV SOUTHERN CALIFORNIA, KERCKHOFF HALL, 734 W ADAMS BLVD, MC7725, LOS ANGELES, CA 90089 USA	1932-8036			INT J COMMUN-US	Int. J. Commun.		2011	5
J	Yu, HL; Fletcher, M; Buck, T				Yu, Honglan; Fletcher, Margaret; Buck, Trevor			Managing digital transformation during re-internationalization: Trajectories and implications for performance	JOURNAL OF INTERNATIONAL MANAGEMENT			English	Article						Re-internationalization; Digital transformation; Internationalized SMEs; International performance	DYNAMIC CAPABILITIES; KNOWLEDGE ACQUISITION; RETROSPECTIVE REPORTS; MARKET REENTRY; UPPSALA MODEL; BUSINESS; FIRMS; EXPLORATION; TECHNOLOGY; MANAGEMENT	This paper contributes to our theoretical understanding of how SMEs digitally transform during re-internationalization. We conducted qualitative, multiple-case studies into reinternationalization processes across 11 Chinese international SMEs. Using inductive data analysis, we identify two types of digital transformation, operational and strategic, and trajectories during re-internationalization.…	[Yu, Honglan] Univ Huddersfield, Huddersfield Business Sch, Huddersfield HD1 3DH, W Yorkshire, England; [Fletcher, Margaret; Buck, Trevor] Univ Glasgow, Adam Smith Business Sch, Gilbert Scott Bldg, Glasgow G12 8QQ, Lanark, Scotland	University of Huddersfield; University of Glasgow	Yu, HL (corresponding author), Univ Huddersfield, Huddersfield Business Sch, Huddersfield HD1 3DH, W Yorkshire, England.	H.Yu2@hud.ac.uk; Margaret.Fletcher@glasgow.ac.uk; Trevor.Buck@glasgow.ac.uk	Fletcher, Margaret/HNQ-5888-2023; N'Dri, Amoin Bernadine/IWD-7811-2023	Yu, Honglan/0000-0002-1492-4250					132	17	17	29	152	ELSEVIER	AMSTERDAM	RADARWEG 29, 1043 NX AMSTERDAM, NETHERLANDS	1075-4253	1873-0620		J INT MANAG	J. Int. Manag.	DEC	2022	28	4
J	Ding, DF; Zhang, RL				Ding, Difeng; Zhang, Ruilian			China's COVID-19 Control Strategy and Its Impact on the Global Pandemic	FRONTIERS IN PUBLIC HEALTH			English	Article						COVID-19; control strategy; challenges; equity; global pandemic	HEALTH-CARE	Public health crises are challenging for governments and health systems, and coronavirus disease 2019 (COVID-19) has presented huge challenges to humans worldwide. In the context of COVID-19 in China, we explore China's control strategies and challenges. Our analysis examines seven strategies: digital technology pandemic prevention, zero-case policy, all-staff nucleic acid testing, all-staff vacc…	[Ding, Difeng] Hohai Univ, Sch Marxism, Nanjing, Peoples R China; [Zhang, Ruilian] Univ Queensland, Sustainable Minerals Inst, Brisbane, Qld, Australia	Hohai University; University of Queensland	Zhang, RL (corresponding author), Univ Queensland, Sustainable Minerals Inst, Brisbane, Qld, Australia.	ruilian.zhang@uq.edu.au	Zhang, Ruilian/N-4087-2017	Zhang, Ruilian/0000-0001-5064-1226					45	17	18	6	49	FRONTIERS MEDIA SA	LAUSANNE	AVENUE DU TRIBUNAL FEDERAL 34, LAUSANNE, CH-1015, SWITZERLAND		2296-2565		FRONT PUBLIC HEALTH	Front. Public Health	MAR 14	2022	10
J	McCarthy, P; Sammon, D; Alhassan, I				McCarthy, Patrick; Sammon, David; Alhassan, Ibrahim			Digital Transformation Leadership Characteristics: a Literature Analysis	JOURNAL OF DECISION SYSTEMS			English	Article						Digital transformation; leadership; open coding; literature analysis; taxonomy; c-suite		Digital Transformation has generated much research and curiosity recently, with the COVID-19 global pandemic accelerating its pace across all industry sectors. Current literature has not adequately provided a comprehensive understanding of Digital Transformation Leadership (DTL). The objective of this research is to explore the characteristics of DTL by undertaking a comprehensive review of Infor…	[McCarthy, Patrick] Munster Technol Univ Cork, Dept Comp Sci, Munster, Ireland; [Sammon, David] Cork Univ, Business Sch, Univ Coll Cork, Dept Business Informat Syst, Cork, Ireland; [Alhassan, Ibrahim] Saudi Elect Univ, E Commerce Dept, Riyadh, Saudi Arabia	University College Cork; Saudi Electronic University	McCarthy, P (corresponding author), Cork Univ, Business Sch, Univ Coll Cork, Cork, Ireland.	pat.mccarthy@cit.ie		Sammon, David/0000-0001-6138-0105; Alhassan, Ibrahim/0000-0002-3118-0855					89	17	17	14	97	TAYLOR & FRANCIS LTD	ABINGDON	2-4 PARK SQUARE, MILTON PARK, ABINGDON OR14 4RN, OXON, ENGLAND	1246-0125	2116-7052		J DECIS SYST	J. Decis. Syst.	DEC 21	2022	32	1
J	Meessen, B				Meessen, Bruno			The Role of Digital Strategies in Financing Health Care for Universal Health Coverage in Low- and Middle-Income Countries	GLOBAL HEALTH-SCIENCE AND PRACTICE			English	Article							INTERVENTIONS; PERFORMANCE; PROTECTION; INSURANCE; FRAMEWORK; ACCESS	Countries finance health care using a combination of 3 main functions: raising resources for health, pooling resources, and purchasing health services. In this paper, we examine how digital health technologies can be used to enhance these health financing functions in low- and middle-income countries and can thus contribute to progress toward universal health coverage. We illustrate our points by…	[Meessen, Bruno] Inst Trop Med, Antwerp, Belgium	Institute of Tropical Medicine (ITM)	Meessen, B (corresponding author), Inst Trop Med, Antwerp, Belgium.	bmeessen@itg.be	owoyele, babajide/AAD-7054-2020	owoyele, babajide/0000-0002-3688-5248; Meessen, Bruno/0000-0002-0359-8621	Aetna Foundation; World Health Organization; Johns Hopkins University Global mHealth Initiative	Aetna Foundation; World Health Organization(World Health Organization); Johns Hopkins University Global mHealth Initiative	This work was made possible by a grant from the Aetna Foundation, with support from the World Health Organization and The Johns Hopkins University Global mHealth Initiative.		47	17	17	7	33	US AGENCY INT DEVELOPMENT-USAID	BALTIMORE	US AGENCY INT DEVELOPMENT-USAID, BALTIMORE, MD 00000 USA	2169-575X			GLOB HEALTH-SCI PRAC	Glob. Health	OCT 10	2018	6
J	Rodríguez-Andrés, R				Rodriguez-Andres, Roberto			Trump 2016: ?President Elected Thanks to Social Media?	PALABRA CLAVE			English	Article						Social media; Internet; Twitter; Facebook; Trump; political communication	TWITTER; CLINTON; AGE	The Internet and social media, particularly Twitter and Facebook, have been identified as one of the factors that contributed to Donald Trump's triumph in the United States presidential elections of 2016. In this paper, we describe how the Republican candidate used social media and what his digital strategies were, after directly monitoring the campaign and reviewing journalistic information, as …	[Rodriguez-Andres, Roberto] Univ Pontificia Comilla, Madrid, Spain	Comillas Pontifical University	Rodríguez-Andrés, R (corresponding author), Univ Pontificia Comilla, Madrid, Spain.	rrodrigueza@comillas.edu	Rodríguez-Andrés, Roberto/AAA-9002-2019; ANDRÉS, Roberto RODRÍGUEZ/A-1346-2014	Rodríguez-Andrés, Roberto/0000-0003-4262-8237; ANDRÉS, Roberto RODRÍGUEZ/0000-0003-4262-8237					81	17	18	0	57	UNIV SABANA, FAC COMUNICACION	CUNDINAMARCA	CAMPUS PUENTE COMUN, KM 7, AUTOPISTA NORTE BOGOTA CHIA, CUNDINAMARCA, 00000, COLOMBIA	0122-8285	2027-534X		PALABRA CLAVE	Palabra Clave	SEP	2018	21	3
J	Pettersson, K; Sakki, I				Pettersson, Katarina; Sakki, Inari			Pray for the fatherland! Discursive and digital strategies at play in nationalist political blogging	QUALITATIVE RESEARCH IN PSYCHOLOGY			English	Article						Nationalism; persuasion; political blogs; political communication; qualitative research	EXTREME-RIGHT; CONSTRUCTION; ONLINE; RACISM; OPPORTUNITIES; PREJUDICE; RACE	Political blogs have come to constitute important channels for expressing nationalist and anti-immigration political views. The new forms that this rhetoric may take, comprising an intricate intermingling of verbal, digital, (audio-)visual, and communicative elements, present challenges for qualitative research. In this article we propose a way for analysing this new nationalist political discour…	[Pettersson, Katarina; Sakki, Inari] Univ Helsinki, Dept Social Res, Social Psychol, Helsinki, Finland	University of Helsinki	Pettersson, K (corresponding author), Univ Helsinki, Dept Social Res, POB 54, FIN-00014 Helsinki, Finland.	katarina.pettersson@helsinki.fi		Pettersson, Katarina/0000-0001-8336-9505	Kulttuurin ja Yhteiskunnan Tutkimuksen Toimikunta, Suomen Akatemia [252141]; Academy of Finland (AKA) [252141] Funding Source: Academy of Finland (AKA)	Kulttuurin ja Yhteiskunnan Tutkimuksen Toimikunta, Suomen Akatemia; Academy of Finland (AKA)(Research Council of Finland)	The authors received funding from Kulttuurin ja Yhteiskunnan Tutkimuksen Toimikunta, Suomen Akatemia, grant number 252141.		93	17	17	0	14	ROUTLEDGE JOURNALS, TAYLOR & FRANCIS LTD	ABINGDON	2-4 PARK SQUARE, MILTON PARK, ABINGDON OX14 4RN, OXON, ENGLAND	1478-0887	1478-0895		QUAL RES PSYCHOL	Qual. Res. Psychol.		2017	14	3
J	Yarbro, J; McKnight, K; Elliott, S; Kurz, A; Wardlow, L				Yarbro, Jessica; McKnight, Katherine; Elliott, Stephen; Kurz, Alexander; Wardlow, Liane			Digital Instructional Strategies and Their Role in Classroom Learning	JOURNAL OF RESEARCH ON TECHNOLOGY IN EDUCATION			English	Article						digital instructional strategy; digital instructional tactic; opportunity to learn	OPPORTUNITY; CURRICULUM; STUDENTS	Research that examines technology use in the context of daily classroom practices is needed to support the effective digital conversion of classrooms. In this study, 65 seventh-through 10th-grade Mathematics and English Language Arts teachers from six districts across six states logged information about digital strategies they incorporated into their lessons to teach specific academic content sta…	[Yarbro, Jessica] George Mason Univ, Dept Psychol, MS 3F5, Fairfax, VA 22030 USA; [McKnight, Katherine] Pearsons Res & Innovat Network, Res, Fairfax, VA USA; [Elliott, Stephen; Kurz, Alexander] Arizona State Univ, T Denny Sanford Sch Social & Family Dynam, Tempe, AZ 85287 USA; [Elliott, Stephen] Australian Catholic Univ, Sydney, NSW, Australia; [Wardlow, Liane] Pearsons Res & Innovat Network, Fai…	George Mason University; Arizona State University; Arizona State University-Tempe; Australian Catholic University	Yarbro, J (corresponding author), George Mason Univ, Dept Psychol, MS 3F5, Fairfax, VA 22030 USA.	jyarbro@masonlive.gmu.edu		McKnight, Katherine/0000-0002-8760-7408; Kurz, Alexander/0000-0001-6490-025X; , Liane/0000-0002-4111-5280					32	17	18	1	3	ROUTLEDGE JOURNALS, TAYLOR & FRANCIS LTD	ABINGDON	2-4 PARK SQUARE, MILTON PARK, ABINGDON OX14 4RN, OXON, ENGLAND	1539-1523	1945-0818		J RES TECHNOL EDUC	J. Res. Technol. Educ.		2016	48	4
J	Xu, JW; Yu, YB; Zhang, M; Zhang, JZ				Xu, Jiawei; Yu, Yubing; Zhang, Min; Zhang, Justin Zuopeng			Impacts of digital transformation on eco-innovation and sustainable performance: Evidence from Chinese manufacturing companies	JOURNAL OF CLEANER PRODUCTION			English	Article						Digital transformation; Eco-innovation; Sustainable performance; Manufacturers	INFORMATION-TECHNOLOGY; MEDIATING ROLE; CAPABILITY; MANAGEMENT; FLEXIBILITY	Companies actively seek digital transformation to achieve sustainable development in a volatile and uncertain environment. This study investigates the effects of digital transformation (digital strategy and capability) on eco-innovation (eco-process, eco-product, and eco-management innovation) and sustainable performance. The par-tial least squares structural equation modeling is employed for ass…	[Xu, Jiawei; Yu, Yubing] Zhejiang Wanli Univ, Sch Logist & Ecommerce, Ningbo, Peoples R China; [Zhang, Min] Queens Univ Belfast, Queens Management Sch, Belfast, North Ireland; [Zhang, Justin Zuopeng] Univ North Florida, Coggin Coll Business, Jacksonville, FL USA	Zhejiang Wanli University; Queens University Belfast; State University System of Florida; University of North Florida	Yu, YB (corresponding author), Zhejiang Wanli Univ, Sch Logist & Ecommerce, Ningbo, Peoples R China.	jiaweixu2022@126.com; yubing@zwu.edu.cn; m.zhang@qub.ac.uk; justin.zhang@unf.edu	Zhang, Justin/M-9298-2019; Yu, Yubing/N-4482-2019	Zhang, Justin/0000-0002-4074-9505; Yu, Yubing/0000-0002-0763-9718; Xu, Jiawei/0000-0003-1229-8070; zhang, min/0000-0002-7955-1467	Zhejiang Provincial Soft ScienceResearch Project [2022C35087]; Zhejiang Provincial Philosophyand Social Sciences Planning Project [23NDJC245YB]	Zhejiang Provincial Soft ScienceResearch Project; Zhejiang Provincial Philosophyand Social Sciences Planning Project	Acknowledgments This research was supported by Zhejiang Provincial Soft ScienceResearch Project (# 2022C35087) and Zhejiang Provincial Philosophyand Social Sciences Planning Project (# 23NDJC245YB) , China.		75	16	16	130	146	ELSEVIER SCI LTD	OXFORD	THE BOULEVARD, LANGFORD LANE, KIDLINGTON, OXFORD OX5 1GB, OXON, ENGLAND	0959-6526	1879-1786		J CLEAN PROD	J. Clean Prod.	MAR 20	2023	393
J	Fernandez-Vidal, J; Perotti, FA; Gonzalez, R; Gasco, J				Fernandez-Vidal, Jorge; Perotti, Francesco Antonio; Gonzalez, Reyes; Gasco, Jose			Managing digital transformation: The view from the top	JOURNAL OF BUSINESS RESEARCH			English	Article						Digital Transformation; Corporate Transformation; Corporate strategy; Digital strategy; Talent management	INNOVATION; BUSINESS; FUTURE; ORGANIZATION; MANAGEMENT; MODEL	Digital Transformation is upending businesses everywhere. While there is ample research on this topic, there is a clear gap when it comes to understanding the changing talent management role of senior executives in digital transformation processes and the demands of individual employees. This article relies on 23 in-depth interviews with senior managers who are leading all or some of the digital …	[Fernandez-Vidal, Jorge] IE Business Sch, Dept Strategy, Alicante, Spain; [Fernandez-Vidal, Jorge] Univ Alicante, Alicante, Spain; [Perotti, Francesco Antonio] Univ Turin, Dept Management, Turin, Italy; [Gonzalez, Reyes; Gasco, Jose] Univ Alicante, Dept Management, Alicante, Spain	IE University; Universitat d'Alacant; University of Turin; Universitat d'Alacant	Fernandez-Vidal, J (corresponding author), IE Business Sch, Dept Strategy, Alicante, Spain.;Fernandez-Vidal, J (corresponding author), Univ Alicante, Alicante, Spain.	jfernandezv@faculty.ie.edu; francescoantonio.perotti@unito.it; mr.gonzalez@ua.es; jl.gasco@ua.es	Gascó, José L/L-1794-2014; Celestino, Leandro/HIR-4215-2022; Fernandez Vidal, Jorge/HIZ-5766-2022; Gonzalez-Ramirez, Reyes/L-1893-2014	Gascó, José L/0000-0003-2461-7702; Gonzalez-Ramirez, Reyes/0000-0002-9758-7957; Perotti, Francesco Antonio/0000-0002-4719-7774					120	16	16	66	260	ELSEVIER SCIENCE INC	NEW YORK	STE 800, 230 PARK AVE, NEW YORK, NY 10169 USA	0148-2963	1873-7978		J BUS RES	J. Bus. Res.	NOV	2022	152
J	Ko, A; Fehér, P; Kovacs, T; Mitev, A; Szabó, Z				Ko, Andrea; Feher, Peter; Kovacs, Tibor; Mitev, Ariel; Szabo, Zoltan			Influencing factors of digital transformation: management or IT is the driving force?	INTERNATIONAL JOURNAL OF INNOVATION SCIENCE			English	Article						Structural equation modeling; Digital transformation; Management commitment; Digital innovation; Digital strategy; Role of IT department	INFORMATION-TECHNOLOGY; INNOVATION; SHADOW; ACCEPTANCE; GOVERNANCE	Purpose - This research aims to discuss the success of digital transformation focusing on the role of IT and management commitment in digitalization together with sectorial relevance as influencing factors. According to the literature, these dimensions are key elements of digitalization, and there is no consensus on their decisiveness. The authors measure the success of digital transformation wit…	[Ko, Andrea; Feher, Peter; Kovacs, Tibor; Mitev, Ariel; Szabo, Zoltan] Corvinus Univ Budapest, Budapest, Hungary	Corvinus University Budapest	Ko, A (corresponding author), Corvinus Univ Budapest, Budapest, Hungary.	andrea.ko@uni-corvinus.hu	Mitev, Ariel/ACP-3192-2022; Kovacs, Tibor/ABD-2662-2020	Mitev, Ariel/0000-0002-9986-3513; Kovacs, Tibor/0000-0002-7408-998X; Szabo, Zoltan/0000-0001-9466-1448; Ko, Andrea/0000-0003-0023-1143	European Union [EFOP-3.6.1-16-2016-00013]	European Union(European Union (EU))	This publication was written within the Szechenyi 2020 programme framework (EFOP-3.6.1-16-2016-00013) under the European Union project titled: Institutional developments for intelligent specialization at the Szekesfehervar Campus of Corvinus University of Budapest.		82	16	16	24	124	EMERALD GROUP PUBLISHING LTD	BINGLEY	HOWARD HOUSE, WAGON LANE, BINGLEY BD16 1WA, W YORKSHIRE, ENGLAND	1757-2223	1757-2231		INT J INOV SCI	Int. J. Innov. Sci.	JAN 7	2022	14	1
J	Hutchinson, J				Hutchinson, Jonathon			Micro-platformization for digital activism on social media	INFORMATION COMMUNICATION & SOCIETY			English	Article						Digital activism; YouTube; micro-platformization; influencers; MCNs		Social media emerged with a broad understanding that egalitarian practices would become the standard approach to publishing and distributing content. In recent times we have seen this flat hierarchical approach fade as commercial stakeholders, platform providers and content publishers continue to design and practice exclusionary processes to ensure their work is visible. This current practice lim…	[Hutchinson, Jonathon] Univ Sydney, Dept Media & Commun, Room N233,John Woolley Bldg A20,Manning Rd, Sydney, NSW 2006, Australia	University of Sydney	Hutchinson, J (corresponding author), Univ Sydney, Dept Media & Commun, Room N233,John Woolley Bldg A20,Manning Rd, Sydney, NSW 2006, Australia.	jonathon.hutchinson@sydney.edu.au	Hutchinson, Jonathon/P-7182-2017	Hutchinson, Jonathon/0000-0001-7349-1662	Sydney Social Science and Humanities Advanced Research Centre (SSSHARC) under the Launch Fellowship Scheme	Sydney Social Science and Humanities Advanced Research Centre (SSSHARC) under the Launch Fellowship Scheme	This research was made possible by funding from the Sydney Social Science and Humanities Advanced Research Centre (SSSHARC) under the Launch Fellowship Scheme.		29	16	16	8	24	ROUTLEDGE JOURNALS, TAYLOR & FRANCIS LTD	ABINGDON	2-4 PARK SQUARE, MILTON PARK, ABINGDON OX14 4RN, OXON, ENGLAND	1369-118X	1468-4462		INFORM COMMUN SOC	Info. Commun. Soc.	JAN 2	2021	24	1
J	Vila, TD; González, EA; Vila, NA; Brea, JAF				Dominguez Vila, Trinidad; Alen Gonzalez, Elisa; Araujo Vila, Noelia; Fraiz Brea, Jose Antonio			Indicators of Website Features in the User Experience of E-Tourism Search and Metasearch Engines	JOURNAL OF THEORETICAL AND APPLIED ELECTRONIC COMMERCE RESEARCH			English	Article						User experience; E-commerce; Tourism search and metasearch engines; GAM	E-SERVICE QUALITY; E-COMMERCE; PURCHASE INTENTIONS; INFORMATION SEARCH; WEB SITES; ONLINE; TECHNOLOGY; ACCEPTANCE; MANAGEMENT; DESIGN	The continuous growth of e-commerce, combined with new trends in the tourism sector, creates an imperative to conduct analyses and establish suitable models for improving the experience of users who seek tourism products online, using search and metasearch engines. However, few studies analyze web design variables and their impacts on the user experience. Therefore, the present study aims to inve…	[Dominguez Vila, Trinidad; Alen Gonzalez, Elisa; Araujo Vila, Noelia; Fraiz Brea, Jose Antonio] Univ Vigo, Fac Business Sci & Tourism, Orense, Spain	Universidade de Vigo	Vila, TD (corresponding author), Univ Vigo, Fac Business Sci & Tourism, Orense, Spain.	trinidad@uvigo.es; alen@uvigo.es; naraujo@uvigo.es; jafraiz@uvigo.es	FRAIZ BREA, JOSE ANTONIO/G-4431-2015; Alen, Elisa/K-6037-2014	FRAIZ BREA, JOSE ANTONIO/0000-0002-3190-6492; Alen, Elisa/0000-0002-6304-7805					145	16	16	6	200	MDPI	BASEL	ST ALBAN-ANLAGE 66, CH-4052 BASEL, SWITZERLAND	0718-1876			J THEOR APPL EL COMM	J. Theor. Appl. Electron. Commer. Res.	JAN	2021	16	1
J	Ziemssen, T; Kern, R; Voigt, I; Haase, R				Ziemssen, Tjalf; Kern, Raimar; Voigt, Isabel; Haase, Rocco			Data Collection in Multiple Sclerosis: The MSDS Approach	FRONTIERS IN NEUROLOGY			English	Article						multiple sclerosis; documentation; digital patient management; post-authorization safety study; MSDS3D	REAL-WORLD; DOCUMENTATION SYSTEM; TECHNOLOGY; MANAGEMENT; THERAPY; IMPLEMENTATION; FINGOLIMOD; DISABILITY; LIFE	Multiple sclerosis (MS) is a frequent chronic inflammatory disease of the central nervous system that affects patients over decades. As the monitoring and treatment of MS become more personalized and complex, the individual assessment and collection of different parameters ranging from clinical assessments via laboratory and imaging data to patient-reported data become increasingly important for …	[Ziemssen, Tjalf; Voigt, Isabel; Haase, Rocco] Univ Hosp Carl Gustav Carus, Ctr Clin Neurosci, Dresden, Germany; [Kern, Raimar] MedicalSyn GmbH, Stuttgart, Germany	Technische Universitat Dresden; Carl Gustav Carus University Hospital	Ziemssen, T (corresponding author), Univ Hosp Carl Gustav Carus, Ctr Clin Neurosci, Dresden, Germany.	tjalf.ziemssen@uniklinikum-dresden.de	Ziemssen, Focke/B-9564-2009	Ziemssen, Focke/0000-0002-3873-0581; Voigt, Isabel/0000-0003-0097-8589; Haase, Rocco/0000-0003-2465-4909	Hertie Foundation; Novartis; Teva; Merck; Roche; Sanofi; Biogen	Hertie Foundation; Novartis(Novartis); Teva(Teva Pharmaceutical Industries); Merck(Merck & Company); Roche(Roche Holding); Sanofi; Biogen(Biogen)	The MSDS3D module development was supported by the Hertie Foundation, Novartis, Teva, Roche, Sanofi, Biogen, and Merck.		88	16	16	0	4	FRONTIERS MEDIA SA	LAUSANNE	AVENUE DU TRIBUNAL FEDERAL 34, LAUSANNE, CH-1015, SWITZERLAND	1664-2295			FRONT NEUROL	Front. Neurol.	JUN 16	2020	11
J	Jin, J; Ma, L; Ye, XW				Jin, Jun; Ma, Lei; Ye, Xinwei			Digital transformation strategies for existed firms: from the perspectives of data ownership and key value propositions	ASIAN JOURNAL OF TECHNOLOGY INNOVATION			English	Article						Digital transformation; key value propositions; data ownership; existed firms; emerging economies	BUSINESS MODELS; INNOVATION; INFORMATION; TECHNOLOGY; RESOURCES; INTERNET	The diffusion and embeddedness of cyber technology and big data technology is recognized as an opportunity and infrastructure for firms to innovate and transform. But which digital strategies existed firms in manufacturing and other traditional industries can make is still a question under research. The paper pursues to answer this question from the perspectives of data ownership and key value pr…	[Jin, Jun] Zhejiang Univ, Sch Management, Hangzhou, Zhejiang, Peoples R China; [Ma, Lei] Nanjing Univ Sci & Technol, Sch Publ Affairs, Xiaolingwei St 200, Nanjing 210094, Jiangsu, Peoples R China; [Ye, Xinwei] Nanjing Univ Sci & Technol, Sch Econ & Management, Nanjing, Jiangsu, Peoples R China	Zhejiang University; Nanjing University of Science & Technology; Nanjing University of Science & Technology	Ma, L (corresponding author), Nanjing Univ Sci & Technol, Sch Publ Affairs, Xiaolingwei St 200, Nanjing 210094, Jiangsu, Peoples R China.	maryma208@sina.com	Jin, Jun/AAQ-3236-2021	Jin, Jun/0000-0003-2350-7069	National Natural Science Foundation of China [71672172, U1509221]	National Natural Science Foundation of China(National Natural Science Foundation of China (NSFC))	This work was supported by National Natural Science Foundation of China [grant number 71672172, U1509221].		46	16	17	17	214	ROUTLEDGE JOURNALS, TAYLOR & FRANCIS LTD	ABINGDON	2-4 PARK SQUARE, MILTON PARK, ABINGDON OX14 4RN, OXON, ENGLAND	1976-1597	2158-6721		ASIAN J TECHNOL INNO	Asian J. Technol. Innov.	JAN 2	2020	28	1
J	De Bernardi, P; Bertello, A; Shams, SMR				De Bernardi, Paola; Bertello, Alberto; Shams, S. M. Riad			LOGICS HINDERING DIGITAL TRANSFORMATION IN CULTURAL HERITAGE STRATEGIC MANAGEMENT: AN EXPLORATORY CASE STUDY	TOURISM ANALYSIS			English	Article						Museum digitalization; Organizational transformation; Cultural strategic management; Cultural tourism; Digital strategy	MARKET ORIENTATION; MUSEUM VISITORS; TOURISM; INNOVATION; IMPACT	Museums play an important role in tourist flows, especially in cities that are famous for their cultural heritage. To valorize their role, these cultural institutions should open themselves to visitors as vectors of social, educational, and entertainment values. In particular, museums need to reinvent how they transmit information about their collections and how they engage visitors, keeping in m…	[De Bernardi, Paola; Bertello, Alberto] Univ Turin, Dept Management, Cso Unione Soviet 218 Bis, I-10134 Turin, Italy; [Shams, S. M. Riad] Ural Fed Univ, Dept Int Econ & Management, Ekaterinburg, Russia	University of Turin; Ural Federal University	De Bernardi, P (corresponding author), Univ Turin, Dept Management, Cso Unione Soviet 218 Bis, I-10134 Turin, Italy.	paola.debernardi@unito.it	Baldissera, Annalisa/AHD-6334-2022; DE BERNARDI, Paola/AAE-7105-2019; DE BERNARDI, PAOLA/I-4807-2018	DE BERNARDI, Paola/0000-0002-6776-6735; DE BERNARDI, PAOLA/0000-0002-6776-6735					63	16	16	12	76	COGNIZANT COMMUNICATION CORP	PUTNAM VALLEY	18 PEEKSKILL HOLLOW RD, PO BOX 37, PUTNAM VALLEY, NY 10579 USA	1083-5423	1943-3999		TOUR ANAL	Tour. Anal.		2019	24	3
J	Dharod, A; Bellinger, C; Foley, K; Case, LD; Miller, D				Dharod, Ajay; Bellinger, Christina; Foley, Kristie; Case, L. Doug; Miller, David			The Reach and Feasibility of an Interactive Lung Cancer Screening Decision Aid Delivered by Patient Portal	APPLIED CLINICAL INFORMATICS			English	Article						electronic health records; eligibility determination; decision support techniques; patient portals; cancer early detection	DOSE COMPUTED-TOMOGRAPHY; PRIMARY-CARE PROVIDERS; TRIAL; MANAGEMENT; KNOWLEDGE; ATTITUDES; RISK; TIME	Objective Health systems could adopt population-level approaches to screening by identifying potential screening candidates from the electronic health record and reaching out to them via the patient portal. However, whether patients would read or act on sent information is unknown. We examined the feasibility of this digital health outreach strategy. Methods We conducted a single-arm pragmatic tr…	[Dharod, Ajay; Miller, David] Wake Forest Univ, Wake Forest Sch Med, Sect Gen Internal Med, Dept Internal Med, Winston Salem, NC 27109 USA; [Dharod, Ajay; Foley, Kristie; Miller, David] Wake Forest Univ, Wake Forest Sch Med, Dept Implementat Sci, Winston Salem, NC 27109 USA; [Bellinger, Christina] Wake Forest Univ, Wake Forest Sch Med, Dept Internal Med, Sect Pulm Crit Care Allergy & Immunol, Win…	Wake Forest University; Wake Forest University; Wake Forest University; Wake Forest University	Dharod, A (corresponding author), Wake Forest Sch Med, Sect Gen Internal Med, Dept Internal Med, 1 Med Ctr Blvd, Winston Salem, NC 27157 USA.	adharod@wakehealth.edu			Wake Forest University Comprehensive Cancer Center [NCI CCSG P30CA012197]; Wake Forest Clinical and Translational Science Institute [NCATS UL1TR001420]	Wake Forest University Comprehensive Cancer Center; Wake Forest Clinical and Translational Science Institute	This study received funding from the Wake Forest University Comprehensive Cancer Center (NCI CCSG P30CA012197) and the Wake Forest Clinical and Translational Science Institute (NCATS UL1TR001420).		44	16	16	0	6	GEORG THIEME VERLAG KG	STUTTGART	RUDIGERSTR 14, D-70469 STUTTGART, GERMANY	1869-0327			APPL CLIN INFORM	Appl. Clin. Inform.	JAN	2019	10	1
J	Sánchez, MA; Zuntini, JI				Analia Sanchez, Marisa; Zuntini, Juana I.			Organizational readiness for the digital transformation: a case study research	REVISTA GESTAO & TECNOLOGIA-JOURNAL OF MANAGEMENT AND TECHNOLOGY			English	Article						Digital transformation; digital strategy; The Five Competitive Forces Model; Value Chain Analysis; Dynamic capabilities; Ecosystem theory	BIG DATA; MANAGEMENT	The world is changing profoundly and it has gone from the industrial age to the era of intelligent and connected products with consequences both in organizations and society. The aim of this research work is to formulate a framework that explains resources, capabilities and management choices necessary to respond to the new environment. The scope is on small and medium sized established companies…	[Analia Sanchez, Marisa] Univ Nacl Sur, Dept Management Sci, Grad & Postgrad Courses, Bahia Blanca, Buenos Aires, Argentina; [Zuntini, Juana I.] Univ Nacl Sur, Dept Management Sci, Bahia Blanca, Buenos Aires, Argentina	National University of the South; National University of the South	Sánchez, MA (corresponding author), Univ Nacl Sur, Dept Management Sci, Grad & Postgrad Courses, Bahia Blanca, Buenos Aires, Argentina.	mas@uns.edu.ar; jzuntini@uns.edu.ar	Sanchez, Marisa A/M-6135-2014	Sanchez, Marisa A/0000-0002-8291-0491					33	16	16	3	104	FUNDACAO PEDRO LEOPOLDO	PEDRO LEOPOLDO	AV LINCOLN DIOGO VIANA 830, PEDRO LEOPOLDO, MG 33600-000, BRAZIL	1677-9479	2177-6652		REV GEST TECNOL	Rev. Gest. Tecnol.	MAY-AUG	2018	18	2
J	Iaia, L; Scorrano, P; Fait, M; Cavallo, F				Iaia, Lea; Scorrano, Paola; Fait, Monica; Cavallo, Federica			Wine, family businesses and web: marketing strategies to compete effectively	BRITISH FOOD JOURNAL			English	Article						Family firms; Wine industry; Website; Online strategies; Web communication	E-SATISFACTION; ONLINE; OWNERSHIP; CONSUMER; FIRMS	Purpose - The purpose of this paper is to deepen the web marketing strategies used by wine family businesses (FBs) with the aim to identify the role assigned to websites, the online models and the competitive strategies implemented through them. Design/methodology/approach - In order to examine the content and structure of the information found on the website of selected FBs, an ad hoc analysis m…	[Iaia, Lea; Scorrano, Paola; Fait, Monica; Cavallo, Federica] Univ Salento, Dept Management Econ Math & Stat, Lecce, Italy	University of Salento	Scorrano, P (corresponding author), Univ Salento, Dept Management Econ Math & Stat, Lecce, Italy.	paola.scorrano@unisalento.it	Fait, Monica/AAA-4283-2020; Iaia, Lea/R-4911-2019; scorrano, paola/N-6534-2015	Fait, Monica/0000-0003-2448-3839; Iaia, Lea/0000-0003-4650-1233; scorrano, paola/0000-0002-7964-9931					64	16	17	3	32	EMERALD GROUP PUBLISHING LTD	BINGLEY	HOWARD HOUSE, WAGON LANE, BINGLEY BD16 1WA, W YORKSHIRE, ENGLAND	0007-070X	1758-4108		BRIT FOOD J	Br. Food J.		2017	119	11
J	Han, BR; Sun, TS; Chu, LY; Wu, LX				Han, Brian Rongqing; Sun, Tianshu; Chu, Leon Yang; Wu, Lixia			COVID-19 and E-Commerce Operations: Evidence from Alibaba	M&SOM-MANUFACTURING & SERVICE OPERATIONS MANAGEMENT			English	Article						e-commerce; COVID-19; containment measures; digital resilience; logistics	SUPPLY CHAIN GLITCHES; IMPACT; MARKETS	Problem definition: This paper investigates the impact of COVID-19 on e-commerce sales and the underlying operational driver. Academic/practical relevance: As COVID-19 continues to disrupt offline retail, anecdotal evidence suggests a rapid growth of e-commerce. However, the pandemic may also significantly decrease offline logistics capacity, which in turn decreases e-commerce sales. Then, how do…	[Han, Brian Rongqing] Univ Illinois, Gies Coll Business, Champaign, IL 61820 USA; [Sun, Tianshu] Univ Southern Calif, Marshall Sch Business, Los Angeles, CA 90089 USA; [Chu, Leon Yang] Cheung Kong Grad Sch Business, Beijing 100006, Peoples R China; [Wu, Lixia] Alibaba Grp Inc, Hangzhou 311121, Peoples R China	University of Illinois System; University of Illinois Urbana-Champaign; University of Southern California; Alibaba Group	Han, BR (corresponding author), Univ Illinois, Gies Coll Business, Champaign, IL 61820 USA.	brianhan@illinois.edu; tianshus@marshall.usc.edu; yzhu@ckgsb.edu.cn; wallace.wulx@cainiao.com		Han, Brian/0000-0002-7730-7401					79	15	15	15	173	INFORMS	CATONSVILLE	5521 RESEARCH PARK DR, SUITE 200, CATONSVILLE, MD 21228 USA	1523-4614	1526-5498		M&SOM-MANUF SERV OP	M&SOM-Manuf. Serv. Oper. Manag.	MAY-JUN	2022	24	3
J	Ho, WR; Tsolakis, N; Dawes, T; Dora, M; Kumar, M				Ho, Wan Ri; Tsolakis, Naoum; Dawes, Tom; Dora, Manoj; Kumar, Mukesh			A Digital Strategy Development Framework for Supply Chains	IEEE TRANSACTIONS ON ENGINEERING MANAGEMENT			English	Article						Supply chains; Manufacturing; Companies; Decision making; Robots; Real-time systems; Bibliographies; Digital strategy development; digital supply chain strategy typologies; strategic management; supply chain digitalization criteria; supply chain management	INSTITUTION-BASED VIEW; DYNAMIC CAPABILITIES; INDUSTRY 4.0; MANUFACTURING STRATEGY; AGILE; MANAGEMENT; FUTURE; TRANSFORMATION; KNOWLEDGE; COMPANIES	Digitalization has provoked rapid changes in the operational landscape, thus requiring prompt decision-making across end-to-end supply chains. Notwithstanding the fact that technology is the epicenter of digital transformation, more often than not, organizations fail to effectively adopt innovative applications, harness their full potential, and realize growth and competitiveness. Therefore, this…	[Ho, Wan Ri; Tsolakis, Naoum; Dawes, Tom; Kumar, Mukesh] Univ Cambridge, Inst Mfg, Dept Engn, Cambridge CB3 0FS, England; [Ho, Wan Ri] Swiss Fed Inst Technol, Dept Management Technol & Econ, CH-8092 Zurich, Switzerland; [Dawes, Tom] Valuechain, Warrington WA4 4FS, Cheshire, England; [Dora, Manoj] Brunel Univ London, Brunel Business Sch, Uxbridge UB8 3PH, Middx, England	University of Cambridge; Swiss Federal Institutes of Technology Domain; ETH Zurich; Brunel University	Tsolakis, N (corresponding author), Univ Cambridge, Inst Mfg, Dept Engn, Cambridge CB3 0FS, England.	who@ethz.ch; nt377@cam.ac.uk; tbd24@cam.ac.uk; manoj.dora@brunel.ac.uk; mk501@cam.ac.uk	Kumar, Mukesh/A-9178-2012; N'Dri, Amoin Bernadine/IWD-7811-2023; Tsolakis, Naoum/AAQ-9163-2021	Kumar, Mukesh/0000-0002-1961-5078; Tsolakis, Naoum/0000-0003-2042-7047; Dora, Manoj/0000-0003-4730-8144	Industrial Resilience Research Group at the University of Cambridge	Industrial Resilience Research Group at the University of Cambridge	This work was supported by the Industrial Resilience Research Group at the University of Cambridge. Review of this manuscript was arranged by Department Editor F. CEBI. (Corresponding author: Naoum Tsolakis.)		88	15	15	53	204	IEEE-INST ELECTRICAL ELECTRONICS ENGINEERS INC	PISCATAWAY	445 HOES LANE, PISCATAWAY, NJ 08855-4141 USA	0018-9391	1558-0040		IEEE T ENG MANAGE	IEEE Trans. Eng. Manage.	JUL	2023	70	7
J	Saura, JR; Palacios-Marqués, D; Ribeiro-Soriano, D				Saura, Jose Ramon; Palacios-Marques, Daniel; Ribeiro-Soriano, Domingo			Digital marketing in SMEs via data-driven strategies: Reviewing the current state of research	JOURNAL OF SMALL BUSINESS MANAGEMENT			English	Article						SMEs; entrepreneurial marketing; data sciences; digital marketing; multiple correspondence analysis	MEDIUM-SIZED ENTERPRISES; MULTIPLE CORRESPONDENCE-ANALYSIS; SUPPLY CHAIN MANAGEMENT; SOCIAL NETWORK ANALYSIS; BIG DATA; KNOWLEDGE MANAGEMENT; TECHNOLOGY ADOPTION; SYSTEMATIC REVIEWS; CONJOINT-ANALYSIS; CRM ADOPTION	The development of the Internet and the implementation of traditional marketing strategies have given rise to the emergence of digital marketing strategies exploited both by SMEs and large companies. These companies combine data sciences with digital marketing strategies to sell products, generate brand awareness, or access new markets. The present study aims to understand the role and use of dat…	[Saura, Jose Ramon] Rey Juan Carlos Univ, Dept Business Econ, Paseo Artilleros S-N, Madrid 28032, Spain; [Palacios-Marques, Daniel] Univ Politecn Valencia, Dept Business Org, Valencia, Spain; [Ribeiro-Soriano, Domingo] Univ Alcala, Dept Econ & Business, Alcala De Henares, Spain	Universidad Rey Juan Carlos; Universitat Politecnica de Valencia; Universidad de Alcala	Saura, JR (corresponding author), Rey Juan Carlos Univ, Dept Business Econ, Paseo Artilleros S-N, Madrid 28032, Spain.	joseramon.saura@urjc.es	Ribeiro-Soriano, Domingo/G-5798-2015; Saura, José Ramón/L-2861-2018	Ribeiro-Soriano, Domingo/0000-0003-3222-9101; Saura, José Ramón/0000-0002-9457-7745	Ministry of Science, Innovation and Universities; European Regional Development Fund [RTI2018-096295-B-C22]	Ministry of Science, Innovation and Universities; European Regional Development Fund(European Union (EU))	In gratitude to the Ministry of Science, Innovation and Universities and the European Regional Development Fund: RTI2018-096295-B-C22.		146	15	15	21	120	TAYLOR & FRANCIS INC	PHILADELPHIA	530 WALNUT STREET, STE 850, PHILADELPHIA, PA 19106 USA	0047-2778	1540-627X		J SMALL BUS MANAGE	J. Small Bus. Manag.	MAY 4	2023	61	3
J	Canhoto, AI; Quinton, S; Pera, R; Molinillo, S; Simkin, L				Canhoto, Ana Isabel; Quinton, Sarah; Pera, Rebecca; Molinillo, Sebastin; Simkin, Lyndon			Digital strategy aligning in SMEs: A dynamic capabilities perspective	JOURNAL OF STRATEGIC INFORMATION SYSTEMS			English	Article						Digital strategy aligning; SMEs; Europe; Dynamic capabilities; Five-phase model	INFORMATION-SYSTEMS STRATEGY; MEDIUM-SIZED ENTERPRISES; MARKET ORIENTATION; TECHNOLOGY ADOPTION; SMALL BUSINESSES; E-GOVERNMENT; AS-PRACTICE; ALIGNMENT; ENTREPRENEURIAL; MANAGEMENT	Digital strategy alignment is a dominant concern for today's managers and information systems researchers. Yet research in this area remains fragmented, particularly on the digital strategy alignment of small and medium-sized enterprises (SMEs), which is concerning owing to their value to European economies. Employing dynamic capabilities as an analytical lens, we investigate how 43 British, Iris…	[Canhoto, Ana Isabel] Brunel Univ London, Kingston Lane, Uxbridge UB8 3PH, Middx, England; [Quinton, Sarah] Oxford Brookes Univ, Oxford, England; [Pera, Rebecca] Univ Piemonte Orientale, Vercelli, Italy; [Molinillo, Sebastin] Univ Malaga, Malaga, Spain; [Simkin, Lyndon] Coventry Univ, Coventry, W Midlands, England	Brunel University; Oxford Brookes University; University of Eastern Piedmont Amedeo Avogadro; Universidad de Malaga; Coventry University	Canhoto, AI (corresponding author), Brunel Univ London, Kingston Lane, Uxbridge UB8 3PH, Middx, England.	Ana.Canhoto@brunel.ac.uk	Molinillo, Sebastian/I-2420-2015; Canhoto, Ana Isabel/M-1980-2017	Molinillo, Sebastian/0000-0001-9132-5190; Canhoto, Ana Isabel/0000-0002-1623-611X	Oxford Brookes University, UK [0012-15/48]	Oxford Brookes University, UK	This research received funding from Oxford Brookes University, UK, internal small grants award number 0012-15/48.		101	15	15	52	262	ELSEVIER	AMSTERDAM	RADARWEG 29, 1043 NX AMSTERDAM, NETHERLANDS	0963-8687	1873-1198		J STRATEGIC INF SYST	J. Strateg. Inf. Syst.	SEP	2021	30	3
J	Fumagalli, LAW; Rezende, DA; Guimaraes, TA				Fumagalli, Luis Andre Wernecke; Rezende, Denis Alcides; Guimaraes, Thiago Andre			Challenges for public transportation: Consequences and possible alternatives for the Covid-19 pandemic through strategic digital city application	JOURNAL OF URBAN MANAGEMENT			English	Article						COVID-19; Public transportation; Strategic digital city; Bus	QUALITY ATTRIBUTES; DEMAND; USERS	Public transport was already one of the biggest issues for all municipalities where people are highly concentrated at the same space at the same time. With COVID-19 pandemic and social distancing consequences, mass transportation is actually the main barrier for students and workers dependents of transport to go back to their daily routines with comfort and safety. Thus, the objective is to deter…	[Fumagalli, Luis Andre Wernecke; Rezende, Denis Alcides] Pontificia Univ Catolica Parana PUCPR, R Imaculada Conceicao 1155, BR-80215901 Curitiba, PR, Brazil; [Fumagalli, Luis Andre Wernecke] FAE Business Sch FAE, Av Visconde Guarapuava 3263, BR-80010100 Curitiba, PR, Brazil; [Rezende, Denis Alcides] Depaul Univ, Sch Publ Serv, Chicago, IL 60604 USA; [Rezende, Denis Alcides] USP Univ, Sao Paulo, B…	DePaul University; Universidade Federal do Parana; Laval University; Universite de Montreal; Universidade Federal do Parana	Fumagalli, LAW (corresponding author), FAE Business Sch FAE, Av Visconde Guarapuava 3263, BR-80010 Curitiba, Parana, Brazil.	luis.fumagalli@fae.edu; denis.rezende@pucpr.br; thiagoandre@ufpr.br	Rezende, Denis Alcides/AAR-2488-2021; Fumagalli, Luis André Wernecke/C-7061-2013; Guimaraes, Thiago Andre/JCN-8842-2023	Rezende, Denis Alcides/0000-0002-3327-0424; Fumagalli, Luis André Wernecke/0000-0002-1406-5230;					35	15	16	2	14	ELSEVIER	AMSTERDAM	RADARWEG 29, 1043 NX AMSTERDAM, NETHERLANDS	2226-5856	2589-0360		J URBAN MANAG	J. Urban Manag.	JUN	2021	10	2
J	Mikheev, A; Serkina, Y; Vasyaev, A				Mikheev, Alexey; Serkina, Yana; Vasyaev, Alexander			RETRACTED: Current trends in the digital transformation of higher education institutions in Russia (Retracted article. See APR, 2023)	EDUCATION AND INFORMATION TECHNOLOGIES			English	Article; Retracted Publication						Digital transformation; Digitalization; Higher education; Digital technologies; Social institutions		This research aimed to analyze the current trends in the digital transformation of educational institutions. The investigation lasted from November 2019 to May 2020 and was based on three higher educational institutions (HEIs) in the Russian Federation: Belgorod State University, Moscow State Institute of International Relations, and Kutafin Moscow State Law University. The number of respondents …	[Mikheev, Alexey] MGIMO Univ, Dept Publ Adm, Moscow, Russia; [Serkina, Yana] Belgorod State Natl Res Univ, Dept Management & Mkt, Belgorod, Russia; [Vasyaev, Alexander] Moscow State Law Univ, Dept Advocacy, Moscow, Russia	MGIMO University; Belgorod State University; Kutafin Moscow State Law University	Mikheev, A (corresponding author), MGIMO Univ, Dept Publ Adm, Moscow, Russia.	mikheevalex87@rambler.ru	Serkina, Yana/O-4544-2017; Mikheev, Alexey/AAR-8829-2021	Serkina, Yana/0000-0002-5106-7104; Mikheev, Alexey/0000-0002-9875-8172					28	15	16	10	128	SPRINGER	NEW YORK	ONE NEW YORK PLAZA, SUITE 4600, NEW YORK, NY, UNITED STATES	1360-2357	1573-7608		EDUC INF TECHNOL	Educ. Inf. Technol.	JUL	2021	26	4
J	Punín, MI; Martínez, A; Rencoret, N				Isabel Punin, M.; Martinez, Alison; Rencoret, Nathaly			Digital Media in Ecuador - Future Perspectives	COMUNICAR			Spanish	Article						Communication; digital media; digital trend; development; access; Internet; journalism		The advances in technology, especially in the field of communication, cause mass media to constantly evolve- and thus not to perish. Indeed, this occurs in situations that are marked by a series of media transformations and changes that have affected journalism as a profession and mass media as a process. The studies that have resulted from these changes have been positive and negative. This pape…	[Isabel Punin, M.] Univ Tecn Particular Loja, TC Dept Ciencias Comunicac, Loja, Ecuador; [Martinez, Alison; Rencoret, Nathaly] Univ Tecn Particular Loja, Dept Ciencias Comunicac, Loja, Ecuador	Universidad Tecnica Particular de Loja; Universidad Tecnica Particular de Loja	Punín, MI (corresponding author), Univ Tecn Particular Loja, TC Dept Ciencias Comunicac, Loja, Ecuador.	mipunin@utpl.edu.ec; acmartinez1@utpl.edu.ec; natieangelik@utpl.edu.ec	Punín, M.I/F-1970-2019	Punín, M.I/0000-0001-5052-824X					30	15	17	3	18	GRUPO COMUNICAR	HUELVA	APDO CORREOS 527, HUELVA, 21080, SPAIN	1134-3478	1988-3293		COMUNICAR	Comunicar	JAN 1	2014	21	42
J	Beijer, TR; van Dijk, EJ; de Vries, J; Vermeer, SE; Prokop, M; Meijer, FJA				Beijer, Tim R.; van Dijk, Ewoud J.; de Vries, Joost; Vermeer, Sarah E.; Prokop, Mathias; Meijer, Frederick J. A.			4D-CT angiography differentiating arteriovenous fistula subtypes	CLINICAL NEUROLOGY AND NEUROSURGERY			English	Article						Dural arteriovenous fistula; 4D CTA; Brain; Neurovascular; Neuroimaging	CLINICAL PRESENTATION; VENOUS DRAINAGE; CLASSIFICATION; MALFORMATIONS	Objective and methods: In the diagnostic work-up of patients suspected of a dural arteriovenous fistula (dAVF), imaging has a key role in order to diagnose the dAVF, assess its bleeding risk and choose optimal treatment strategy. Digital subtraction angiography (DSA) is the gold standard for the most detailed image of a dAVF. Nowadays four-dimensional CT angiography (4D-CTA) could possibly be an …	[Beijer, Tim R.; van Dijk, Ewoud J.] Radboud Univ Nijmegen, Med Ctr, Dept Neurol, NL-6500 HB Nijmegen, Netherlands; [de Vries, Joost] Radboud Univ Nijmegen, Med Ctr, Dept Neurosurg, NL-6500 HB Nijmegen, Netherlands; [Vermeer, Sarah E.] Rijnstate Med Ctr, Dept Neurol, Arnhem, Netherlands; [Prokop, Mathias; Meijer, Frederick J. A.] Radboud Univ Nijmegen, Med Ctr, Dept Radiol, NL-6500 HB Nijmegen, N…	Radboud University Nijmegen; Radboud University Nijmegen; Rijnstate Hospital; Radboud University Nijmegen	Meijer, FJA (corresponding author), Radboud Univ Nijmegen, Med Ctr, Dept Radiol, Postbus 9101, NL-6500 HB Nijmegen, Netherlands.	f.meijer@rad.umcn.nl	van Dijk, Ewoud J/J-7951-2012; Vries, J./L-4731-2015; Meijer, Frederick J.A./L-4516-2015; Prokop, W. Mathias/H-8081-2014	Meijer, Frederick J.A./0000-0001-5921-639X; Prokop, W. Mathias/0000-0001-8157-8055					11	15	15	0	2	ELSEVIER SCIENCE BV	AMSTERDAM	PO BOX 211, 1000 AE AMSTERDAM, NETHERLANDS	0303-8467			CLIN NEUROL NEUROSUR	Clin. Neurol. Neurosurg.	AUG	2013	115	8
J	Dennis, EE; Warley, S; Sheridan, J				Dennis, Everette E.; Warley, Stephen; Sheridan, James			Doing Digital: An Assessment of the Top 25 U.S. Media Companies and their Digital Strategies	JOURNAL OF MEDIA BUSINESS STUDIES			English	Article						technology; digital strategy; leadership; company organization		This study examines how major U.S. media companies are developing their digital strategies in the context of earlier work on convergence. Through rare interviews with media leaders and other sources, the ways that media corporations have coped with digital innovation following the dot-com crash are explored, including its delivery and the styles of leadership. The authors posit that media firms f…	[Dennis, Everette E.; Warley, Stephen; Sheridan, James] Fordham Univ, Grad Sch Business, Bronx, NY 10458 USA	Fordham University	Dennis, EE (corresponding author), Fordham Univ, Grad Sch Business, Bronx, NY 10458 USA.								8	15	15	0	1	ROUTLEDGE JOURNALS, TAYLOR & FRANCIS LTD	ABINGDON	2-4 PARK SQUARE, MILTON PARK, ABINGDON OX14 4RN, OXON, ENGLAND	1652-2354	2376-2977		J MEDIA RES STUD	J. Media Res. Stud.		2006	3	1
J	Hu, LL				Hu, Lala			The PPE industry in Italy during COVID-19: supply chain disruption and the adoption of digital and social media in B2B firms	JOURNAL OF BUSINESS & INDUSTRIAL MARKETING			English	Article						Supply chain; B2B; Social media; Disruption; COVID-19; PPE	TRADE FAIRS; BUSINESS; IMPACT; TECHNOLOGY; STRATEGIES; INSIGHTS; SALES; PERFORMANCE; DEPENDENCE; DECISIONS	Purpose The purpose of this paper is to analyze how the personal protective equipment (PPE) industry managed supply chain and business relationships disrupted by the COVID-19 pandemic, and the adoption of digital and social media during the period of crisis management. Design/methodology/approach The methodology used is qualitative based on 14 interviews with 11 PPE firms operating in Italy, the …	[Hu, Lala] Univ Cattolica Sacro Cuore, Milan, Italy	Catholic University of the Sacred Heart	Hu, LL (corresponding author), Univ Cattolica Sacro Cuore, Milan, Italy.	lala.hu@unicatt.it		Hu, Lala/0000-0001-5492-3706					61	14	14	8	47	EMERALD GROUP PUBLISHING LTD	BINGLEY	HOWARD HOUSE, WAGON LANE, BINGLEY BD16 1WA, W YORKSHIRE, ENGLAND	0885-8624	2052-1189		J BUS IND MARK	J. Bus. Ind. Mark.	OCT 21	2022	37	10
J	Leao, P; da Silva, MM				Leao, Pedro; da Silva, Miguel Mira			Impacts of digital transformation on firms' competitive advantages: A systematic literature review	STRATEGIC CHANGE-BRIEFINGS IN ENTREPRENEURIAL FINANCE			English	Article						competitive advantage; digital strategy; digital transformation; global value chains; impact	STRATEGIC GROUPS; BUSINESS MODELS; RESOURCE; DIVERSIFICATION; PERSPECTIVE; VIEW	Digital transformation impacts firms' competitiveness mainly on innovation, efficiency, cost reduction, and impacts global value chains on specialization, geographic scope, governance, and upgrading. According to literature, the impacts of digital transformation over firms' competitiveness, while presenting a more prominent role over more classical advantages, present a majority of positively sig…	[Leao, Pedro] Univ Lisbon, AESE Business Sch, Lisbon, Portugal; [da Silva, Miguel Mira] Univ Lisbon, INOV, Lisbon, Portugal	Universidade de Lisboa; Universidade de Lisboa; INOV INESC Inovacao	Leao, P (corresponding author), Av Rovisco Pais 1, P-1049001 Lisbon, Portugal.	pedro.leao@tecnico.ulisboa.pt	Mira da Silva, Miguel/A-2892-2009; Mira da Silva, Miguel/ABA-4774-2021	Mira da Silva, Miguel/0000-0002-0489-4465; Mira da Silva, Miguel/0000-0002-0489-4465					71	14	14	32	164	JOHN WILEY & SONS LTD	CHICHESTER	THE ATRIUM, SOUTHERN GATE, CHICHESTER PO19 8SQ, W SUSSEX, ENGLAND	1086-1718	1099-1697		STRATEG CHANG	Strateg. Chang.	SEP	2021	30	5
J	Delgado, F				Delgado, Francisco			Teaching Physics for Computer Science Students in Higher Education During the COVID-19 Pandemic: A Fully Internet-Supported Course	FUTURE INTERNET			English	Article						blended learning; mobile learning; COVID-19; physics education; performance learning; educational innovation; higher education		The COVID-19 pandemic has modified and diversified the ways that students receive education. During confinements, complex courses integrating previous knowledge must be carefully designed and implemented to effectively replace the elements present in face-to-face learning to improve the students' experience. This work assesses the implementation of a digital-learning physics course for computer s…	[Delgado, Francisco] Tecnol Monterrey, Sch Engn & Sci, Atizapan 52926, Mexico	Tecnologico de Monterrey	Delgado, F (corresponding author), Tecnol Monterrey, Sch Engn & Sci, Atizapan 52926, Mexico.	fdelgado@tec.mx	Delgado, Francisco/A-7728-2015	Delgado, Francisco/0000-0002-9809-6746	Writing Lab, Institute for the Future of Education, Tecnologico de Monterrey, Mexico	Writing Lab, Institute for the Future of Education, Tecnologico de Monterrey, Mexico	I am grateful to my students for their dedication during the COVID-19 crisis from October to November 2020. Thanks, particularly, because their participation contributed to in-depth knowledge about blended learning, which was proved successfully during a critical era for humankind. Special thanks to Lourdes Quezada and Mario Estrada for the exemplary collaboration as a team teaching for the block…		51	14	14	0	15	MDPI	BASEL	ST ALBAN-ANLAGE 66, CH-4052 BASEL, SWITZERLAND		1999-5903		FUTURE INTERNET	Future Internet	FEB	2021	13	2
J	Hall, N; Schmitz, HP; Dedmon, JM				Hall, Nina; Schmitz, Hans Peter; Dedmon, J. Michael			Transnational Advocacy and NGOs in the Digital Era: New Forms of Networked Power	INTERNATIONAL STUDIES QUARTERLY			English	Article							INTERNET; RIGHTS	International relations (IR) scholars have recognized the importance of technology in enabling nongovernmental organizations (NGOs) to build transnational networks and enhance their influence. However, IR scholars have typically focused on elite networks across NGOs, states, and international organizations. This article considers how digital technologies generate new types of networked power betw…	[Hall, Nina] Johns Hopkins Univ, Baltimore, MD 21218 USA; [Schmitz, Hans Peter] Univ San Diego, San Diego, CA 92110 USA; [Dedmon, J. Michael] Syracuse Univ, Polit Sci, Syracuse, NY 13244 USA	Johns Hopkins University; University of San Diego; Syracuse University	Hall, N (corresponding author), Johns Hopkins Univ, Baltimore, MD 21218 USA.		Hall, Nina/AAQ-2987-2020; Schmitz, Hans Peter/AAL-6100-2020; Schmitz, Hans Peter/AEF-9711-2022	Hall, Nina/0000-0002-6318-9029; Schmitz, Hans Peter/0000-0002-8343-7755; Schmitz, Hans Peter/0000-0002-8343-7755; Dedmon, J. Michael/0000-0002-8467-2765					67	14	14	3	15	OXFORD UNIV PRESS	OXFORD	GREAT CLARENDON ST, OXFORD OX2 6DP, ENGLAND	0020-8833	1468-2478		INT STUD QUART	Int. Stud. Q.	MAR	2020	64	1
J	Schubert, O; Beuer, F; Güth, JF; Nold, E; Edelhoff, D; Metz, I				Schubert, O.; Beuer, F.; Gueth, J-F; Nold, E.; Edelhoff, D.; Metz, I			Two digital strategies in modern implantology - root-analogue implants and the digital one-abutment/one-time concept	INTERNATIONAL JOURNAL OF COMPUTERIZED DENTISTRY			English	Article						computer-aided design/computer-aided manufacturing (CAD/CAM); custom-made implant; cone beam computed tomography (CBCT); guided surgery; immediate implantation; intraoral scanning (IOS); root-analogue implant (RAI); one-abutment/one-time; three-dimensional (3D) diagnosis	SINGLE-TOOTH REPLACEMENT; DENTAL IMPLANTS; EXTRACTION SOCKETS; LITHIUM DISILICATE; ZIRCONIA IMPLANT; CUSTOM-MADE; FOLLOW-UP; IN-VITRO; IMMEDIATE; TITANIUM	The irreversible trend toward digitization in dentistry and dental technology has resulted in technical progress and continuous changes to conventional workflows. In particular, implantology and prosthetics have benefited from a multitude of interesting new possibilities. Three-dimensional (3D) computed radiography and digital surface scanning can be invaluable in terms of backward planning and m…	[Schubert, O.; Gueth, J-F; Nold, E.; Edelhoff, D.; Metz, I] LMU Munchen, Klinikum Univ Munchen, Poliklin Zahnarztliche Prothet, Goethestr 70, D-80336 Munich, Germany; [Beuer, F.] Charite Univ Med Berlin, Ctr Zahn Mund & Kieferheilkunde, Abt Zahnarztliche Prothet Funkt Lehre & Alterszah, Berlin, Germany	University of Munich; Free University of Berlin; Humboldt University of Berlin; Charite Universitatsmedizin Berlin	Schubert, O (corresponding author), LMU Munchen, Klinikum Univ Munchen, Poliklin Zahnarztliche Prothet, Goethestr 70, D-80336 Munich, Germany.	oliver.schubert@med.uni-muenchen.de		Beuer, Florian/0000-0003-0246-790X					55	14	14	1	7	QUINTESSENCE PUBLISHING CO INC	HANOVER PARK	4350 CHANDLER DRIVE, HANOVER PARK, IL 60133 USA	1463-4201			INT J COMPUT DENT	Int. J. Comput. Dent.		2018	21	2
J	Hestres, LE				Hestres, Luis E.			Tools Beyond Control: Social Media and the Work of Advocacy Organizations	SOCIAL MEDIA + SOCIETY			English	Article						Internet governance; private information intermediaries; advocacy organizations; social media; Facebook; Twitter; activism	INTERNET GOVERNANCE; MOBILIZATION; PRIVACY	Advocacy organizations rely on social media services, such as Facebook and Twitter, to engage their supporters. These services increasingly influence how citizens and advocacy organizations engage politically online through the technical features and policies they choose to implement-a phenomenon that can sometimes disrupt the work of advocates. Interviews with digital strategists at several US a…	[Hestres, Luis E.] Univ Texas San Antonio, One UTSA Circle, San Antonio, TX 78249 USA	University of Texas System; University of Texas at San Antonio (UTSA)	Hestres, LE (corresponding author), Univ Texas San Antonio, One UTSA Circle, San Antonio, TX 78249 USA.	luis.hestres@utsa.edu	Hestres, Luis/M-7249-2019						63	14	14	1	7	SAGE PUBLICATIONS LTD	LONDON	1 OLIVERS YARD, 55 CITY ROAD, LONDON EC1Y 1SP, ENGLAND	2056-3051			SOC MEDIA SOC	Soc. Med. Soc.	APR-JUN	2017	3	2
J	Alizadeh, T				Alizadeh, Tooran			A policy analysis of digital strategies: Brisbane vs. Vancouver	INTERNATIONAL JOURNAL OF KNOWLEDGE-BASED DEVELOPMENT			English	Article						digital strategy; Australia; Canada; economic development; policy analysis	REGIONAL-DEVELOPMENT; ECONOMIC-GEOGRAPHY; INNOVATION POLICY; KNOWLEDGE; CAPABILITIES; MANAGEMENT; DYNAMICS; GROWTH; LEVEL	A growing number of cities around the world have now realised the need to strategically capitalise on the rapidly growing digital economy. In mid-2013, cities of Brisbane, Australia and Vancouver, Canada both released their 'Digital Strategy' documents to strengthen their economy by enhancing digital connections amongst citizens, business, and the whole city as a digital organisation. The paper c…	[Alizadeh, Tooran] Griffith Univ, Griffith Sch Environm, Nathan Campus,170 Kessels Rd, Brisbane, Qld 4111, Australia	Griffith University	Alizadeh, T (corresponding author), Griffith Univ, Griffith Sch Environm, Nathan Campus,170 Kessels Rd, Brisbane, Qld 4111, Australia.	t.alizadeh@griffith.edu.au	Alizadeh, Tooran/AAX-2371-2020	Alizadeh, Tooran/0000-0001-5424-3348					75	14	14	1	10	INDERSCIENCE ENTERPRISES LTD	GENEVA	WORLD TRADE CENTER BLDG, 29 ROUTE DE PRE-BOIS, CASE POSTALE 856, CH-1215 GENEVA, SWITZERLAND	2040-4468	2040-4476		INT J KNOWL-BASED DE	Int. J. Knowl.-Based Dev.		2015	6	2
J	Rendina, HJ; Talan, AJ; Tavella, NF; Matos, JL; Jimenez, RH; Jones, SS; Salfas, B; Westmoreland, D				Rendina, H. Jonathon; Talan, Ali J.; Tavella, Nicola F.; Matos, Jonathan Lopez; Jimenez, Ruben H.; Jones, S. Scott; Salfas, Brian; Westmoreland, Drew			Leveraging Technology to Blend Large-Scale Epidemiologic Surveillance With Social and Behavioral Science Methods: Successes, Challenges, and Lessons Learned Implementing the UNITE Longitudinal Cohort Study of HIV Risk Factors Among Sexual Minority Men in the United States	AMERICAN JOURNAL OF EPIDEMIOLOGY			English	Article						cohort methods; digital technology; HIV prevention; home-based testing; sexual minority men	GAY; HEALTH; CITY	The use of digital technologies to conduct large-scale research with limited interaction (i.e., no in-person contact) and objective endpoints (i.e., biological testing) has significant potential for the field of epidemiology, but limited research to date has been published on the successes and challenges of such approaches. We analyzed data from a cohort study of sexual minority men across the Un…	[Rendina, H. Jonathon; Talan, Ali J.; Tavella, Nicola F.; Matos, Jonathan Lopez; Jimenez, Ruben H.; Jones, S. Scott; Salfas, Brian] CUNY Hunter Coll, Dept Psychol, 695 Pk Ave, New York, NY 10065 USA; [Rendina, H. Jonathon; Matos, Jonathan Lopez] CUNY, Grad Ctr, Hlth Psychol & Clin Sci PhD Program, New York, NY USA; [Westmoreland, Drew] CUNY, Grad Sch Publ Hlth & Hlth Policy, New York, NY 10021 USA	City University of New York (CUNY) System; Hunter College (CUNY); City University of New York (CUNY) System; City University of New York (CUNY) System	Rendina, HJ (corresponding author), CUNY Hunter Coll, Dept Psychol, 695 Pk Ave, New York, NY 10065 USA.	hrendina@hunter.cuny.edu	Westmoreland, Drew A./GMX-2667-2022; Westmoreland, Drew A./GZG-4428-2022	Westmoreland, Drew A./0000-0003-4085-7941;	Eunice Kennedy Shriver National Institute of Child Health and Human Development [UG3-AI133674]; National Institute on Drug Abuse [UG3-AI133674]; National Institute of Allergy and Infectious Diseases [UG3-AI133674]; National Institute of Mental Health [UG3-AI133674]	Eunice Kennedy Shriver National Institute of Child Health and Human Development(United States Department of Health & Human ServicesNational Institutes of Health (NIH) - USANIH Eunice Kennedy Shriver National Institute of Child Health & Human Development (NICHD)); National Institute on Drug Abuse(United States Department of Health & Human ServicesNational Institutes of Health (NIH) - USANIH Nation…	This study was supported by a grant jointly awarded by the National Institute of Allergy and Infectious Diseases, National Institute of Mental Health, Eunice Kennedy Shriver National Institute of Child Health and Human Development, and National Institute on Drug Abuse (grant UG3-AI133674, PI: H.J.R.).		36	13	13	0	2	OXFORD UNIV PRESS INC	CARY	JOURNALS DEPT, 2001 EVANS RD, CARY, NC 27513 USA	0002-9262	1476-6256		AM J EPIDEMIOL	Am. J. Epidemiol.	APR	2021	190	4
J	Saura, JR; Palos-Sanchez, P; Herráez, BR				Ramon Saura, Jose; Palos-Sanchez, Pedro; Rodriguez Herraez, Beatriz			Digital Marketing for Sustainable Growth: Business Models and Online Campaigns Using Sustainable Strategies	SUSTAINABILITY			English	Article						sustainable digital marketing strategies; sustainable business models; sustainable management; social network analysis for sustainability	SOCIAL MEDIA	In recent years, digital marketing has transformed the way in which companies communicate with their customers around the world. The increase in the use of social networks and how users communicate with companies on the Internet has given rise to new business models based on the bidirectionality of communication between companies and Internet users. Digital marketing, new business models, online …	[Ramon Saura, Jose; Rodriguez Herraez, Beatriz] Rey Juan Carlos Univ, Dept Business Econ, Fac Social Sci & Law, Paseo Artilleros S-N, Madrid 28032, Spain; [Palos-Sanchez, Pedro] Univ Seville, Dept Financial Econ & Operat Management, Seville 41018, Spain	Universidad Rey Juan Carlos; University of Sevilla	Saura, JR (corresponding author), Rey Juan Carlos Univ, Dept Business Econ, Fac Social Sci & Law, Paseo Artilleros S-N, Madrid 28032, Spain.	joseramon.saura@urjc.es; ppalos@us.es; beatriz.rodriguez@urjc.es	Palos-Sanchez, Pedro R./A-8952-2017; Saura, José Ramón/L-2861-2018; Rodriguez, Beatriz/CAG-0904-2022	Palos-Sanchez, Pedro R./0000-0001-9966-0698; Saura, José Ramón/0000-0002-9457-7745; Rodriguez, Beatriz/0000-0003-4880-4596					22	13	13	24	104	MDPI	BASEL	ST ALBAN-ANLAGE 66, CH-4052 BASEL, SWITZERLAND		2071-1050		SUSTAINABILITY-BASEL	Sustainability	FEB	2020	12	3
J	Nixon, B				Nixon, Brice			The business of news in the attention economy: Audience labor and MediaNews Group's efforts to capitalize on news consumption	JOURNALISM			English	Article						Attention economy; audience labor; Digital First Media; digital news; exploitation; MediaNews Group; news consumption; newspaper industry; political economy of news		This article analyzes the business of news in the early 21st century through a case study of the US newspaper company MediaNews Group. It examines the company's efforts over the past decade to create sources of revenue while the US newspaper industry faced a growing financial crisis. This article argues it is necessary to rethink the political economy of news to see that power over news consumpti…	[Nixon, Brice] Univ Penn, Annenberg Sch Commun, 3620 Walnut St, Philadelphia, PA 19104 USA	University of Pennsylvania	Nixon, B (corresponding author), Univ Penn, Annenberg Sch Commun, 3620 Walnut St, Philadelphia, PA 19104 USA.	bln222@nyu.edu							65	13	14	5	31	SAGE PUBLICATIONS INC	THOUSAND OAKS	2455 TELLER RD, THOUSAND OAKS, CA 91320 USA	1464-8849	1741-3001		JOURNALISM	Journalism	JAN	2020	21	1
J	Alizadeh, T; Sipe, N				Alizadeh, Tooran; Sipe, Neil			Brisbane's digital strategy: an economic strategy for the digital age?	AUSTRALIAN PLANNER			English	Article						smart city; business strategy; economic strategy; third wave; digital strategy; triple helix	SMART CITIES; INFORMATION; UNIVERSITY; INDUSTRY; CITY	A growing number of cities around the world have now realised the need to use digital technology to capitalise on the rapidly growing digitally driven economy. In mid-2013 Brisbane, Australia released its 'Digital Strategy' document to strengthen its economy through improved productivity for local businesses. The article is based on a combination of policy analysis and empirical data gathered thr…	[Alizadeh, Tooran] Griffith Univ, Urban Res Program, Nathan, Qld 4111, Australia; [Sipe, Neil] Univ Queensland, Sch Geog Planning & Environm Management, St Lucia, Qld, Australia	Griffith University; University of Queensland	Alizadeh, T (corresponding author), Griffith Univ, Urban Res Program, Nathan, Qld 4111, Australia.	t.alizadeh@griffith.edu.au	Alizadeh, Tooran/AAX-2371-2020; Sipe, Neil G./A-4052-2009	Sipe, Neil G./0000-0002-3228-3768; Alizadeh, Tooran/0000-0001-5424-3348					48	13	13	1	18	ROUTLEDGE JOURNALS, TAYLOR & FRANCIS LTD	ABINGDON	2-4 PARK SQUARE, MILTON PARK, ABINGDON OX14 4RN, OXON, ENGLAND	0729-3682	2150-6841		AUST PLAN	Aust. Plan.	JAN 2	2015	52	1
J	Reggi, L; Scicchitano, S				Reggi, Luigi; Scicchitano, Sergio			Are EU regional digital strategies evidence-based? An analysis of the allocation of 2007-13 Structural Funds	TELECOMMUNICATIONS POLICY			English	Article						Information Society; Digital Agenda; Regional Policy; Cohesion Policy; Structural Funds; e-Services; e-Government; Cluster analysis	INFORMATION-SOCIETY	The ambitious goals of the European Digital Agenda need active involvement by regional innovation systems. Effective regional digital strategies should be both consistent with the European framework and based on available evidence on the needs and opportunities of local contexts. Such evidence should be used to balance the different components of the Information Society development (e.g. eService…	[Reggi, Luigi; Scicchitano, Sergio] Minist Econ Dev, Dept Dev & Econ Cohes, Rome, Italy; [Reggi, Luigi; Scicchitano, Sergio] Univ Urbino, DESP, EIBURS TAIPS Team, I-61029 Urbino, Italy	University of Urbino	Reggi, L (corresponding author), Minist Econ Dev, Dept Dev & Econ Cohes, Rome, Italy.	luigi.reggi@gmail.com; luigi.reggi@tesoro.it	Scicchitano, Sergio/X-8492-2018	Scicchitano, Sergio/0000-0003-1015-7629	Eiburs - EIB University Research Sponsorship Programme; EU Cohesion Policy	Eiburs - EIB University Research Sponsorship Programme; EU Cohesion Policy	This paper is part of the research project Technology Adoption and Innovation in Public Services (TAIPS). The project is carried out by the Department of Economics, Society and Politics (DESP), University of Urbino, Italy, and funded by Eiburs - EIB University Research Sponsorship Programme.; The authors would like to thank Pasquale D'Alessandro and the European Commission - DG Regional Policy fo…		28	13	13	0	20	ELSEVIER SCI LTD	OXFORD	THE BOULEVARD, LANGFORD LANE, KIDLINGTON, OXFORD OX5 1GB, OXON, ENGLAND	0308-5961	1879-3258		TELECOMMUN POLICY	Telecommun. Policy	JUN-JUL	2014	38	5-6
J	Blikstad-Balas, M; Hvistendahl, R				Blikstad-Balas, Marte; Hvistendahl, Rita			Students' Digital Strategies and Shortcuts-Searching for Answers on Wikipedia as a Core Literacy Practice in Upper Secondary School	NORDIC JOURNAL OF DIGITAL LITERACY			English	Article						Assessment; Digital literacy; School tasks; Wikipedia	INFORMATION; BELIEFS; WEB	When the classroom is connected to the Internet, the number of possible sources of information is almost infinite. Nevertheless, students tend to systematically favor the online encyclopedia Wikipedia as a source for knowledge. The present study combines quantitative and qualitative data to investigate the role Wikipedia plays in the literacy practices of students working on school tasks. It also…	[Blikstad-Balas, Marte; Hvistendahl, Rita] Univ Oslo, Dept Educ & Sch Res, Fac Educ Sci, Oslo, Norway	University of Oslo	Blikstad-Balas, M (corresponding author), Univ Oslo, Dept Educ & Sch Res, Fac Educ Sci, Oslo, Norway.	marte.blikstad-balas@ils.uio.no; r.e.hvistendahl@ils.uio.no							46	13	13	0	0	UNIVERSITETSFORLAGET AS	OSLO	SEHESTEDS GATE 3, PO BOX 508, OSLO, 0105, NORWAY	0809-6724	1891-943X		NORD J DIGIT LIT	Nord. J. Digit. Lit.		2013	8	1-2
J	Ning, Y; Li, LX; Xu, SX; Yang, SL				Ning, Yu; Li, Lixu; Xu, Su Xiu; Yang, Shuili			How do digital technologies improve supply chain resilience in the COVID-19 pandemic? Evidence from Chinese manufacturing firms	FRONTIERS OF ENGINEERING MANAGEMENT			English	Article						digital technologies; supply chain resilience; information processing theory; COVID-19; China	BIG DATA; PERFORMANCE; INTERNET; AGILITY; DESIGN; IMPACT; TRACEABILITY; CAPABILITIES; ANALYTICS; PRODUCTS	Digital technologies (DTs) can assist businesses in coping with supply chain (SC) disruptions caused by unpredictability, such as pandemics. However, the current knowledge of the relationship between DTs and supply chain resilience (SCR) is insufficient. This study draws on information processing theory to develop a serial mediation model to address this deficiency. We analyze a sample set consis…	[Ning, Yu] South China Univ Technol, Sch Business Adm, Guangzhou 510641, Peoples R China; [Li, Lixu; Yang, Shuili] Xian Univ Technol, Sch Econ & Management, Xian 710054, Peoples R China; [Xu, Su Xiu] Beijing Inst Technol, Sch Management & Econ, Beijing 100081, Peoples R China	South China University of Technology; Xi'an University of Technology; Beijing Institute of Technology	Li, LX (corresponding author), Xian Univ Technol, Sch Econ & Management, Xian 710054, Peoples R China.	li.lixu@foxmail.com		Li, Lixu/0000-0002-1927-0604	Key Project of the National Social Science Foundation of China [21AJY020]	Key Project of the National Social Science Foundation of China(National Office of Philosophy and Social Sciences)	This work was funded by the Key Project of the National Social Science Foundation of China (Grant No. 21AJY020).		80	12	12	27	42	HIGHER EDUCATION PRESS	BEIJING	CHAOYANG DIST, 4, HUIXINDONGJIE, FUSHENG BLDG, BEIJING 100029, PEOPLES R CHINA	2095-7513	2096-0255		FRONT ENG MANAG	Front. Eng. Manag.	MAR	2023	10	1
J	Gull, H; Saeed, S; Iqbal, SZ; Bamarouf, YA; Alqahtani, MA; Alabbad, DA; Saqib, M; Al Qahtani, SH; Alamer, A				Gull, Hina; Saeed, Saqib; Iqbal, Sardar Zafar; Bamarouf, Yasser A.; Alqahtani, Mohammed A.; Alabbad, Dina A.; Saqib, Madeeha; Al Qahtani, Saeed Hussein; Alamer, Albandary			An Empirical Study of Mobile Commerce and Customers Security Perception in Saudi Arabia	ELECTRONICS			English	Article						mobile commerce; security; digital strategy; digital transformation; user security	USABILITY EVALUATION; PRIVACY; ADOPTION; AUTHENTICATION; CONSUMERS; SEM	Digital transformation of businesses has seen tremendous growth recently, moreover, COVID-19 has increased online shopping. However, it is important for businesses that customers' online shopping experience is secure and joyful. In this paper, customers' security perception regarding some leading mobile commerce applications in Saudi Arabia is explored. Our survey questions focused on three aspec…	[Gull, Hina; Iqbal, Sardar Zafar; Bamarouf, Yasser A.; Alqahtani, Mohammed A.; Saqib, Madeeha; Al Qahtani, Saeed Hussein; Alamer, Albandary] Imam Abdulrahman Bin Faisal Univ, Coll Comp Sci & Informat Technol, Dept Comp Informat Syst, POB 1982, Dammam 31441, Saudi Arabia; [Saeed, Saqib] Imam Abdulrahman Bin Faisal Univ, Coll Comp Sci & Informat Technol, Dept Comp Informat Syst, Saudi Aramco Cybers…	Imam Abdulrahman Bin Faisal University; Imam Abdulrahman Bin Faisal University; Imam Abdulrahman Bin Faisal University	Saqib, M (corresponding author), Imam Abdulrahman Bin Faisal Univ, Coll Comp Sci & Informat Technol, Dept Comp Informat Syst, POB 1982, Dammam 31441, Saudi Arabia.	hgull@iau.edu.sa; sbsaed@iau.edu.sa; saiqbal@iau.edu.sa; yabamarouf@iau.edu.sa; maqhtani@iau.edu.sa; daalabbad@iau.edu.sa; mssaeed@iau.edu.sa; shaqahtani@iau.edu.sa; amalamer@iau.edu.sa	Alamer, Albandary/GYA-4905-2022; Saeed, Saqib/E-4381-2014; Alabbad, Dina/GYU-5534-2022; Saqib, Madeeha/GYA-2663-2022	Alamer, Albandary/0000-0002-5994-2321; Saeed, Saqib/0000-0001-7136-3480; Alabbad, Dina/0000-0001-7624-8924; Saqib, Madeeha/0000-0003-4856-8095; Gull, Hina/0000-0002-6685-5189; Al Qahtani, Saeed Hussein/0000-0002-7424-6420; Alqahtani, Dr. Mohammed/0000-0002-5158-3344					68	12	12	0	18	MDPI	BASEL	ST ALBAN-ANLAGE 66, CH-4052 BASEL, SWITZERLAND		2079-9292		ELECTRONICS-SWITZ	Electronics	FEB	2022	11	3
J	Fernandez-Vidal, J; Gonzalez, R; Gasco, J; Llopis, J				Fernandez-Vidal, Jorge; Gonzalez, Reyes; Gasco, Jose; Llopis, Juan			Digitalization and corporate transformation: The case of European oil & gas firms	TECHNOLOGICAL FORECASTING AND SOCIAL CHANGE			English	Article						Digital transformation; Business transformation; Digital strategy; Corporate strategy; Energy sector	STRATEGY TOOLS; GENERATION; INNOVATION; CAPABILITY; INDUSTRY; OPTIONS; ERA	Digital technologies have had a tremendous impact on the world and have forced companies to adapt their business models, strategies and management practices. There is a scarcity of research about digital transformation in the energy sector, so this paper aims to analyze this phenomenon in the Oil & Gas sector through a comparative case analysis of eight market leading European Oil & Gas companies…	[Fernandez-Vidal, Jorge] Univ Alicante, Fac Econ, Alicante 03690, Spain; [Gonzalez, Reyes; Gasco, Jose; Llopis, Juan] Univ Alicante, Business Management, Alicante, Spain; [Gasco, Jose] Univ Alicante, Res Inst Tourism, Alicante, Spain	Universitat d'Alacant; Universitat d'Alacant; Universitat d'Alacant	Gonzalez, R (corresponding author), Univ Alicante, Fac Econ, Alicante 03690, Spain.	mr.gonzalez@ua.es	Gascó, José L/L-1794-2014; Fernandez Vidal, Jorge/HIZ-5766-2022; Gonzalez-Ramirez, Reyes/L-1893-2014	Gascó, José L/0000-0003-2461-7702; Gonzalez-Ramirez, Reyes/0000-0002-9758-7957					127	12	12	20	127	ELSEVIER SCIENCE INC	NEW YORK	STE 800, 230 PARK AVE, NEW YORK, NY 10169 USA	0040-1625	1873-5509		TECHNOL FORECAST SOC	Technol. Forecast. Soc. Chang.	JAN	2022	174
J	Yu, JT; Moon, T				Yu, Jiatong; Moon, Taesoo			Impact of Digital Strategic Orientation on Organizational Performance through Digital Competence	SUSTAINABILITY			English	Article						customer orientation; competitor orientation; technology orientation; digital infrastructure; digital integration; digital management; organizational performance	DYNAMIC CAPABILITIES; PLS-SEM; TRANSFORMATION; FUTURE	In the era of the digital economy, enterprises need a comprehensive digital transformation of strategy, business, organization, competence, and operation. However, being limited themselves to the development of digital technology, previous studies mainly focused on the development and application of digital technology, single case studies, and multi-case studies of digital transformation. Few res…	[Yu, Jiatong] China Jiliang Univ, Coll Econ & Management, Hangzhou 310018, Peoples R China; [Moon, Taesoo] Dongguk Univ, Sch Management, Gyeongju 38066, South Korea	China Jiliang University; Dongguk University	Moon, T (corresponding author), Dongguk Univ, Sch Management, Gyeongju 38066, South Korea.	yjt@cjlu.edu.cn; tsmoon@dongguk.ac.kr							43	12	12	50	320	MDPI	BASEL	ST ALBAN-ANLAGE 66, CH-4052 BASEL, SWITZERLAND		2071-1050		SUSTAINABILITY-BASEL	Sustainability	SEP	2021	13	17
J	Tan, YH; Reddy, SK				Tan, Yee Heng; Reddy, Srinivas K.			Crowdfunding digital platforms: Backer networks and their impact on project outcomes	SOCIAL NETWORKS			English	Article						Crowdfunding; Social networks; Digital strategy; Social influence	SOCIAL NETWORKS; CENTRALITY; ONLINE	Crowdfunding platforms serve to connect project creators and backers. Previous research has explored several project and platform determinants that impact crowdfunding outcomes. However, there has been limited research on these determinants at an individual level. Our paper addresses how backers may influence the outcomes of projects in crowdfunding platforms. We explore several methods commonly …	[Tan, Yee Heng] Tokyo Int Univ, Inst Int Strategy, 1-13-1 Matoba Kita, Kawagoe, Saitama 3501197, Japan; [Reddy, Srinivas K.] Singapore Management Univ, Lee Kong Chian Sch Business, 50 Stamford Rd, Singapore 178899, Singapore	Singapore Management University	Tan, YH (corresponding author), Tokyo Int Univ, Inst Int Strategy, 1-13-1 Matoba Kita, Kawagoe, Saitama 3501197, Japan.	yhtan@tiu.ac.jp; sreddy@smu.edu.sg			SMU's Centre for Marketing Excellence	SMU's Centre for Marketing Excellence	The authors are grateful to the editor and two anonymous reviewers for their helpful comments on previous versions of this article. The authors also acknowledge support provided by SMU's Centre for Marketing Excellence for this research.		41	12	12	1	29	ELSEVIER	AMSTERDAM	RADARWEG 29, 1043 NX AMSTERDAM, NETHERLANDS	0378-8733	1879-2111		SOC NETWORKS	Soc. Networks	JAN	2021	64
J	van Tonder, C; Schachtebeck, C; Nieuwenhuizen, C; Bossink, B				van Tonder, Chante; Schachtebeck, Chris; Nieuwenhuizen, Cecile; Bossink, Bart			A FRAMEWORK FOR DIGITAL TRANSFORMATION AND BUSINESS MODEL INNOVATION	MANAGEMENT-JOURNAL OF CONTEMPORARY MANAGEMENT ISSUES			English	Article						digitalisation; digital transformation; business model innovation	DYNAMIC CAPABILITIES; TECHNOLOGY; ANTECEDENTS; STRATEGY; PRODUCT	With the advent of the Fourth Industrial Revolution, businesses are adapting to the use of digitalisation which requires the digital transformation of their existing business models. However, there is limited empirical research on this phenomenon. The purpose of this study is twofold: (i) to develop a framework for businesses to digitally transform their business models and (ii) to examine litera…	[van Tonder, Chante; Schachtebeck, Chris; Nieuwenhuizen, Cecile] Univ Johannesburg, Dept Business Management, Johannesburg, South Africa; [Bossink, Bart] Vrije Univ, Dept Sci Business & Innovat, Amsterdam, Netherlands	University of Johannesburg; Vrije Universiteit Amsterdam	van Tonder, C (corresponding author), Univ Johannesburg, Dept Business Management, Johannesburg, South Africa.	chantevt@uj.ac.za; cschachtebeck@uj.ac.za; cecilen@uj.ac.za; b.a.g.bossink@vu.nl	Schachtebeck, Chris/AAE-5048-2021	Botha, Chante/0000-0002-1155-416X; Bossink, Bart/0000-0001-9809-5121; Schachtebeck, Chris/0000-0002-9133-2590					68	12	13	24	192	UNIV SPLIT, FAC ECONOMICS	SPLIT	MATICE HRVATSKE 31, SPLIT, 21000, CROATIA	1331-0194	1846-3363		MANAG-J CONTEMP MANA	Manag.-J. Contemp. Manag. Issues	DEC	2020	25	2
J	Flores, CC; Rezende, DA				Flores, Carla C.; Rezende, Denis A.			Twitter information for contributing to the strategic digital city: Towards citizens as co-managers	TELEMATICS AND INFORMATICS			English	Article						Twitter; Strategic digital city; Citizen participation; Information technology; Information quality attributes	SOCIAL MEDIA; GOVERNMENT	Actions towards an effective city management require a focus on citizens, and it is a role of local governments to search for ways to provide their participation in the decision-making process. Among other information technology resources, local governments use social platforms thus facing the challenge of extracting and classifying information for strategic use. The objective of this study is to…	[Flores, Carla C.; Rezende, Denis A.] Pontificia Univ Catolica Parana PUCPR, Postgrad Program Urban Management & Publ Adm, Curitiba, Parana, Brazil	Pontificia Universidade Catolica do Parana	Flores, CC (corresponding author), Pontificia Univ Catolica Parana PUCPR, Postgrad Program Urban Management & Publ Adm, Curitiba, Parana, Brazil.	carla@copta.com.br; denis.rezende@pucpr.br	Rezende, Denis Alcides/AAR-2488-2021	Rezende, Denis Alcides/0000-0002-3327-0424	CNPq-Brazil; FA-Parana	CNPq-Brazil(Conselho Nacional de Desenvolvimento Cientifico e Tecnologico (CNPQ)); FA-Parana	This work was supported by CNPq-Brazil (research fellow) and FA-Parana.		70	12	13	2	32	ELSEVIER SCIENCE BV	AMSTERDAM	PO BOX 211, 1000 AE AMSTERDAM, NETHERLANDS	0736-5853			TELEMAT INFORM	Telemat. Inform.	AUG	2018	35	5
J	Andrade, EL; Evans, WD; Barrett, ND; Cleary, SD; Edberg, MC; Alvayero, RD; Kierstead, EC; Beltran, A				Andrade, E. L.; Evans, W. D.; Barrett, N. D.; Cleary, S. D.; Edberg, M. C.; Alvayero, R. D.; Kierstead, E. C.; Beltran, A.			Development of the place-based Adelante social marketing campaign for prevention of substance use, sexual risk and violence among Latino immigrant youth	HEALTH EDUCATION RESEARCH			English	Article							HIV-PREVENTION; DISEASE PREVENTION; PHYSICAL-ACTIVITY; REFUGEE CHILDREN; AFRICAN-AMERICAN; UNITED-STATES; BEHAVIORS; PROGRAM; INTERVENTION; ADOLESCENTS	Immigrant Latino youth represent a high-risk subgroup that should be targeted with health promotion efforts. However, there are considerable barriers to engagement in health-related programming. Little is known about the engagement possibilities of social marketing campaigns and digital strategies for traditionally 'hard-to-reach' immigrants, underscoring the importance of testing these technique…	[Andrade, E. L.; Evans, W. D.; Barrett, N. D.; Edberg, M. C.; Kierstead, E. C.; Beltran, A.] George Washington Univ, Dept Prevent & Community Hlth, Washington, DC 20052 USA; [Cleary, S. D.] George Washington Univ, Dept Epidemiol & Biostat, Washington, DC 20052 USA; [Alvayero, R. D.] Maryland Multicultural Youth Ctr, 8700 Georgia Ave,Suite 500, Silver Spring, MD 20910 USA	George Washington University; George Washington University	Andrade, EL (corresponding author), George Washington Univ, Dept Prevent & Community Hlth, Washington, DC 20052 USA.	elandrade@gwu.edu	Cleary, Sean D/B-5596-2012	Kierstead, Elexis/0000-0002-8502-0451; Andrade, Elizabeth/0000-0001-7652-1337	National Institute of Minority Health and Health Disparities [1P20MD006898-01]	National Institute of Minority Health and Health Disparities(United States Department of Health & Human ServicesNational Institutes of Health (NIH) - USANIH National Institute on Minority Health & Health Disparities (NIMHD))	National Institute of Minority Health and Health Disparities [Grant number 1P20MD006898-01].		63	12	12	0	36	OXFORD UNIV PRESS	OXFORD	GREAT CLARENDON ST, OXFORD OX2 6DP, ENGLAND	0268-1153	1465-3648		HEALTH EDUC RES	Health Educ. Res.	APR	2018	33	2
J	Stone, M; Aravopoulou, E				Stone, Merlin; Aravopoulou, Eleni			Improving journeys by opening data: the case of Transport for London (TfL)	BOTTOM LINE			English	Article						Public transport; Customer information; Open data; Customer benefits; App development; Cloud hosting	PUBLIC TRANSPORT; TRAVEL; TIMES	Purpose This case study describes how one of the world's largest public transport operations, Transport for London (TfL), transformed the real-time availability of information for its customers and staff through the open data approach, and what the results of this transformation were. The purpose of this paper is therefore to show what is required for an open data approach to work. Design/methodo…	[Stone, Merlin; Aravopoulou, Eleni] St Marys Univ, Dept Management & Social Sci, London, England	St Mary's University Twickenham London	Stone, M (corresponding author), St Marys Univ, Dept Management & Social Sci, London, England.	merlin.stone@stmarys.ac.uk; Eleni.aravopoulou@stmarys.ac.uk	Stone, Merlin/AAC-9082-2019	Stone, Merlin/0000-0003-4687-0629					21	12	12	0	12	EMERALD GROUP PUBLISHING LTD	BINGLEY	HOWARD HOUSE, WAGON LANE, BINGLEY BD16 1WA, W YORKSHIRE, ENGLAND	0888-045X	2054-1724		BOTTOM LINE	Bottom Line		2018	31	1
J	Greco, AN; Wharton, RM				Greco, Albert N.; Wharton, Robert M.			The Market Demand for University Press Books 2008-15	JOURNAL OF SCHOLARLY PUBLISHING			English	Article						innovative business models for scholarly publishing; university presses; e-book electronic publishing; scholarly communication; marketing strategies		This article analyzes important US university press net publishers' revenue and net publishers' unit datasets and.e-book revenues for 2008-9. Data for net publishers' revenues, net publishers' units, and digital e-book revenues for higher education textbooks, professional and scholarly books, and consumer e-books were also evaluated covering the years 2008-9. Drawing on important economic data pr…	[Greco, Albert N.; Wharton, Robert M.] Fordham Univ, Sch Business, Management Syst Area, Bronx, NY 10458 USA	Fordham University	Greco, AN (corresponding author), Fordham Univ, Sch Business, Management Syst Area, Bronx, NY 10458 USA.								30	12	12	0	13	UNIV TORONTO PRESS INC	TORONTO	JOURNALS DIVISION, 5201 DUFFERIN ST, DOWNSVIEW, TORONTO, ON M3H 5T8, CANADA	1198-9742	1710-1166		J SCHOLARLY PUBL	J. Sch. Publ.	OCT	2010	42	1
J	Mussinelli, C				Mussinelli, Cristina			Digital Publishing in Europe: a Focus on France, Germany, Italy and Spain	PUBLISHING RESEARCH QUARTERLY			English	Article						Bookrepublic; Digital content; Digital printing; Digital publishing; eBook; Edigita; Editech; ePublishing; eReaders; Gallimard; Japan; iPad; iPhones; Libranda; Libreka; Planeta; Random House; Santillana; Smartphone; Trade book publisher; Spain; Europe; Italy; France; Germany		In this article we will provide a general overview of the situation of the digital publishing in Europe starting from the insights provided by the Editech conference, the international day of advanced study organized by the Italian Publishers Association and focused on the trends, perspectives and applications of technological innovation in publishing at an international level. It is the main Ita…			Mussinelli, C (corresponding author), Piazza Pietro Gobetti 10, I-20131 Milan, Italy.	c.mussinelli@360publishing.it							0	12	12	0	2	SPRINGER	NEW YORK	233 SPRING ST, NEW YORK, NY 10013 USA	1053-8801	1936-4792		PUBLISH RES Q	Publ. Res. Q.	SEP	2010	26	3
J	Cauffman, C; Goanta, C				Cauffman, Caroline; Goanta, Catalina			A New Order: The Digital Services Act and Consumer Protection	EUROPEAN JOURNAL OF RISK REGULATION			English	Article								On 16 December 2020, the European Commission delivered on the plans proposed in the European Digital Strategy by publishing two proposals related to the governance of digital services in the European Union: the Digital Services Act (DSA) and the Digital Markets Act (DMA). The much-awaited regulatory reform is often mentioned in the context of content moderation and freedom of expression, market p…	[Cauffman, Caroline; Goanta, Catalina] Maastricht Univ, Bouillonstr 1-3, NL-6211 LH Maastricht, Netherlands	Maastricht University	Cauffman, C (corresponding author), Maastricht Univ, Bouillonstr 1-3, NL-6211 LH Maastricht, Netherlands.	caroline.cauffman@maastrichtuniversity.nl; catalina.goanta@maastrichtuniversity.nl	Cauffman, Caroline/K-7726-2019; Cauffman, Caroline/X-1949-2019	Cauffman, Caroline/0000-0002-0159-9823;					31	11	11	6	23	CAMBRIDGE UNIV PRESS	CAMBRIDGE	EDINBURGH BLDG, SHAFTESBURY RD, CB2 8RU CAMBRIDGE, ENGLAND	1867-299X	2190-8249		EUR J RISK REGUL	Eur. J. Risk Regul.	DEC	2021	12	4
J	Ano, B; Bent, R				Ano, Blandine; Bent, Richard			Human determinants influencing the digital transformation strategy of multigenerational family businesses: a multiple-case study of five French growth-oriented family firms	JOURNAL OF FAMILY BUSINESS MANAGEMENT			English	Article						Multigenerational family business; Millennials; Digital strategy; Human capital; Non-economic goals	INNOVATION; AGENDA; IMPACT; SMES	Purpose In a context of technological disruption, companies face a digital imperative to adopt successfully emerging new technologies. While family firms have a huge potential for growth and innovation, they may - due to idiosyncratic but often limited resources, have to address the complex challenges induced by digital technologies introduction. The purpose of this paper is to explore how human …	[Ano, Blandine] Queen Margaret Univ, Edinburgh, Midlothian, Scotland; [Bent, Richard] Queen Margaret Univ, Queen Margaret Business Sch, Edinburgh, Midlothian, Scotland	Queen Margaret University; Queen Margaret University	Ano, B (corresponding author), Queen Margaret Univ, Edinburgh, Midlothian, Scotland.	ano.blandine@gmail.com		, Blandine/0000-0003-0826-0440; Bent, Richard/0000-0003-0709-0160					48	11	11	8	88	EMERALD GROUP PUBLISHING LTD	BINGLEY	HOWARD HOUSE, WAGON LANE, BINGLEY BD16 1WA, W YORKSHIRE, ENGLAND	2043-6238	2043-6246		J FAM BUS MANAG	J. Fam. Bus. Manag.	DEC 1	2022	12	4
J	Hänninen, M; Smedlund, A				Hanninen, Mikko; Smedlund, Anssi			Same Old Song with a Different Melody: The Paradox of Market Reach and Financial Performance on Digital Platforms	JOURNAL OF MANAGEMENT STUDIES			English	Article						digital strategy; entrepreneurship; marketplace; platform economy; service provider; services		In the service sector, digital platforms now enable service providers to reach customers through an online marketplace and use the value-adding complementary services offered. However, despite the widespread prevalence of digital platforms, there has been little research on the market reach and financial performance captured by service providers. We explored these service provider-specific outcom…	[Hanninen, Mikko] Univ Nottingham, Business Sch, Nottingham, England; [Smedlund, Anssi] Aalto Univ, Sch Business, Espoo, Finland	University of Nottingham; Aalto University	Hänninen, M (corresponding author), Univ Nottingham, Business Sch, Operat Management & Informat Syst Div, Nottingham NG8 1BB, England.	mikko.hanninen@nottingham.ac.uk							105	11	11	32	154	WILEY	HOBOKEN	111 RIVER ST, HOBOKEN 07030-5774, NJ USA	0022-2380	1467-6486		J MANAGE STUD	J. Manage. Stud.	NOV	2021	58	7
J	Rahrovani, Y				Rahrovani, Yasser			Platform drifting: When work digitalization hijacks its spirit	JOURNAL OF STRATEGIC INFORMATION SYSTEMS			English	Article						Digital work; Platform alignment; Social media alignment; Platform logic; Platform drifting; Digital strategy; Organizational transformation; Digital transformation	ENTERPRISE SOCIAL MEDIA; INSTITUTIONAL LOGICS; STRATEGIC ALIGNMENT; COMPETING LOGICS; BUSINESS VALUE; ORGANIZATIONS; IDENTITY; CAPABILITIES; PERSPECTIVE; TECHNOLOGY	Organizations are increasingly digitalizing the work associated with information exchange by using enterprise social media. However, social media's openness to outsider users poses significant challenges to maintaining alignment between social media logic (or platform logic that guides decisions and actions on the platform) and the dominant organizational logic. Through an in-depth, longitudinal,…	[Rahrovani, Yasser] Western Univ, Ivey Business Sch, London, ON N6G 0N1, Canada	Western University (University of Western Ontario)	Rahrovani, Y (corresponding author), Western Univ, Ivey Business Sch, London, ON N6G 0N1, Canada.	yrahrovani@ivey.ca		Rahrovani, Yasser/0000-0002-9196-3835	Montreal Toheed Society	Montreal Toheed Society	I am indebted to the participants of this study and to Montreal Toheed Society for supporting this research project. I am grateful for the insightful comments and encouragement received from Editor-in-Chief, Guy Gable, the special issue guest editors, particularly Stefan Klein, and the four anonymous reviewers. I sincerely thank Robert D. Austin, Tima Bansal, Patricia Thornton, Ali Aslan Gumusay,…		95	11	11	14	99	ELSEVIER	AMSTERDAM	RADARWEG 29, 1043 NX AMSTERDAM, NETHERLANDS	0963-8687	1873-1198		J STRATEGIC INF SYST	J. Strateg. Inf. Syst.	JUN	2020	29	2
J	Wong, P; Lee, D; Ng, PML				Wong, Phoebe; Lee, Daisy; Ng, Peggy M. L.			Online search for information about universities: a Hong Kong study	INTERNATIONAL JOURNAL OF EDUCATIONAL MANAGEMENT			English	Article						Higher education institutions; Enrolment; Online university information search; University marketing; University recruitment	HIGHER-EDUCATION; GENDER-DIFFERENCES; SOCIAL MEDIA; RECRUITMENT; STRATEGIES; BRAND; INSTITUTIONS; FACEBOOK; BEHAVIOR; CHOICE	Purpose A fuller understanding of the information search behaviour of prospective students in the digital era is one of the keys to success in university recruitment. The purpose of this paper is to investigate students' university choice factors in relation to the online environment. Design/methodology/approach In total, 637 samples from 11 private higher education institutions were collected an…	[Wong, Phoebe; Lee, Daisy; Ng, Peggy M. L.] Hong Kong Polytech Univ, Sch Profess Educ & Execut Dev, Hong Kong, Hong Kong, Peoples R China	Hong Kong Polytechnic University	Wong, P (corresponding author), Hong Kong Polytech Univ, Sch Profess Educ & Execut Dev, Hong Kong, Hong Kong, Peoples R China.	phoebewws@yahoo.com; smdlee@speed-polyu.edu.hk; sppeggy@speed-polyu.edu.hk	Lee, Daisy/E-7877-2019; Lee, Daisy/CAG-1010-2022	Lee, Daisy/0000-0002-9630-1689; WONG, Wai Sum Phoebe/0000-0002-6404-928X; Ng, Peggy/0000-0001-8659-5700	College of Professional and Continuing Education, The Hong Kong Polytechnic University	College of Professional and Continuing Education, The Hong Kong Polytechnic University	This paper was partially supported by the College of Professional and Continuing Education, The Hong Kong Polytechnic University.		61	11	11	3	25	EMERALD GROUP PUBLISHING LTD	BINGLEY	HOWARD HOUSE, WAGON LANE, BINGLEY BD16 1WA, W YORKSHIRE, ENGLAND	0951-354X	1758-6518		INT J EDUC MANAG	Int. J. Educ. Manag.		2018	32	3
J	Rezende, DA; Procopiuck, M; Figueiredo, FD				Rezende, Denis Alcides; Procopiuck, Mario; Figueiredo, Frederico de Carvalho			Public Policy and a Strategic Digital City Project: A Case Study of the Brazilian Municipality of Vinhedo	JOURNAL OF URBAN TECHNOLOGY			English	Article						digital cities; public policy; strategic municipal planning; strategic digital city; urban management	CITIES	Municipalities interested in communication, education and social development seek to contribute to citizenship by planning, structuring, storing, and providing access to information. Starting with an overview of the global background to discussions on digital cities and the relation between digital cities and public policies, this article seeks to analyze and describe municipal information planni…	[Rezende, Denis Alcides; Procopiuck, Mario; Figueiredo, Frederico de Carvalho] Pontifical Catholic Univ, Postgrad Program Urban Management, Curitiba, Parana, Brazil; [Rezende, Denis Alcides] DePaul Univ, Sch Publ Serv, Chicago, IL USA	Pontificia Universidade Catolica do Parana; DePaul University	Procopiuck, M (corresponding author), Pontifical Catholic Univ, Rua Imaculada Conceicao,1155 Prado Velho, Curitiba, Parana, Brazil.	mario.p@pucpr.br	Rezende, Denis Alcides/AAR-2488-2021; Prokopiuk, Mario/E-1127-2014	Rezende, Denis Alcides/0000-0002-3327-0424; Prokopiuk, Mario/0000-0002-7346-1938					32	11	12	1	20	ROUTLEDGE JOURNALS, TAYLOR & FRANCIS LTD	ABINGDON	4 PARK SQUARE, MILTON PARK, ABINGDON OX14 4RN, OXFORDSHIRE, ENGLAND	1063-0732	1466-1853		J URBAN TECHNOL	J. Urban Technol.	APR 3	2015	22	2
J	Mintz, O; Currim, IS; Jeliazkov, I				Mintz, Ofer; Currim, Imran S.; Jeliazkov, Ivan			Information Processing Pattern and Propensity to Buy: An Investigation of Online Point-of-Purchase Behavior	MARKETING SCIENCE			English	Article						information processing; discrete choice; Markov chain Monte Carlo (MCMC); digital strategy	CONSUMER CHOICE; PROTOCOL ANALYSIS; CLICKSTREAM DATA; DECISION-MAKING; PRIOR KNOWLEDGE; MODEL; ACQUISITION; LIKELIHOOD; INFERENCE; SEEKING	The information processing literature provides a wealth of laboratory evidence on the effects that the choice task and individual characteristics have on the extent to which consumers engage in alternative-based versus attribute-based information processing. Less attention has been paid to studying how the processing pattern at the point of purchase is associated with a consumer's propensity to b…	[Mintz, Ofer] Louisiana State Univ, EJ Ourso Coll Business, Baton Rouge, LA 70803 USA; [Currim, Imran S.] Univ Calif Irvine, Paul Merage Sch Business, Irvine, CA 92697 USA; [Jeliazkov, Ivan] Univ Calif Irvine, Dept Econ, Irvine, CA 92697 USA	Louisiana State University System; Louisiana State University; University of California System; University of California Irvine; University of California System; University of California Irvine	Mintz, O (corresponding author), Louisiana State Univ, EJ Ourso Coll Business, Baton Rouge, LA 70803 USA.	omintz@lsu.edu; iscurrim@uci.edu; ivan@uci.edu	Mintz, Ofer/H-7972-2013; Jeliazkov, Ivan/C-3108-2009	Mintz, Ofer/0000-0003-0512-4283; Jeliazkov, Ivan/0000-0002-4924-9910					36	11	11	2	75	INFORMS	CATONSVILLE	5521 RESEARCH PARK DR, SUITE 200, CATONSVILLE, MD 21228 USA	0732-2399			MARKET SCI	Mark. Sci.	SEP-OCT	2013	32	5
J	Nikitenko, V; Voronkova, V; Oleksenko, R; Andriukaitiene, R; Holovii, L				Nikitenko, Vitalina; Voronkova, Valentyna; Oleksenko, Roman; Andriukaitiene, Regina; Holovii, Liudmyla			Education as a factor of cognitive society development in the conditions of digital transformation	REVISTA DE LA UNIVERSIDAD DEL ZULIA			English	Article						Education; society; computer literacy; Economic systems; information	HOMO-ECONOMICUS	The purpose of the study is to conceptualize the cognitive development of society as a factor of digital transformation. The solution of this problem contributes to the formation of a new theory that requires the introduction of innovative technologies that play a very important role in the sustainable development of society. The research methodology used consists of axiological, comparative, syn…	[Nikitenko, Vitalina; Voronkova, Valentyna] Zaporizhzhia Natl Univ, Zaporizhzhia, Ukraine; [Oleksenko, Roman] Dmytro Motornyi Tavria State Agrotechnol Univ, Melitopol, Ukraine; [Andriukaitiene, Regina] Marijampole Univ Appl Sci, Marijampole, Lithuania; [Andriukaitiene, Regina] Lithuanian Sports Univ, Kaunas, Lithuania; [Holovii, Liudmyla] Natl Univ Life & Environm Sci Ukraine, Kiev, Ukraine	Ministry of Education & Science of Ukraine; Zaporizhzhia National University; Ministry of Education & Science of Ukraine; Dmytro Motornyi Tavria State Agrotechnological University; Lithuanian Sports University; National University of Life & Environmental Sciences of Ukraine	Nikitenko, V (corresponding author), Zaporizhzhia Natl Univ, Zaporizhzhia, Ukraine.	vitalina2006@ukr.net; valentinavoronkova236@gmail.com; roman.xdsl@ukr.net; regina.andriukaitiene@gmail.com; Lyudmyla_Holoviy@nubip.edu.ua	Holovii, Liudmyla/AET-4065-2022; Vitalina, Nikitenko/AAQ-5631-2021; Oleksenko, Roman/I-4725-2017; Voronkova, Valentyna/T-2057-2017	Vitalina, Nikitenko/0000-0001-9588-7836; Oleksenko, Roman/0000-0002-2171-514X; Voronkova, Valentyna/0000-0002-0719-1546					31	10	10	3	10	UNIV ZULIA, FAC HUMANIDADES EDUCACION, CENTRO INVE	MARACAIBO	APARTADO 526, MARACAIBO, ZULIA 00000, VENEZUELA	0041-8811	2665-0428		REV UNIV ZULIA	Rev. Univ. Zulia	SEP-DEC	2022	13	38
J	Van Zeebroeck, N; Kretschmer, T; Bughin, J				Van Zeebroeck, Nicolas; Kretschmer, Tobias; Bughin, Jacques			Digital is Strategy: The Role of Digital Technology Adoption in Strategy Renewal	IEEE TRANSACTIONS ON ENGINEERING MANAGEMENT			English	Article						Companies; Industries; Cognition; Steady-state; Space exploration; Mobile applications; Insurance; Digital strategy; digital transformation; strategic organization design (SOD); strategic renewal; technology adoption	INFORMATION-TECHNOLOGY; ORGANIZATION DESIGN; ALIGNMENT; BUSINESS; CAPABILITIES; INNOVATION; INSIGHTS; AGILITY	As digital technologies emerge and improve rapidly, firms face changing tradeoffs in terms of their technology infrastructure and strategic direction. Hence, many of them adopt new digital technology and develop new business models and strategies. The literature on strategic alignment of IT suggests that firms need to synchronize these different domains of choice. We therefore, ask how far firms …	[Van Zeebroeck, Nicolas] Univ Libre Bruxelles, Solvay Brussels Sch Econ & Management, iCITE, B-1050 Brussels, Belgium; [Kretschmer, Tobias] Ludwig Maximilians Univ Munchen, Inst Strategy Technol & Org, D-80539 Munich, Germany; [Kretschmer, Tobias] Ctr Econ Policy Res, London, England; [Bughin, Jacques] Univ Libre Bruxelles, Solvay Brussels Sch Econ & Management, B-1050 Brussels, Belgium; [Bughin,…	Universite Libre de Bruxelles; Solvay SA; University of Munich; Centre for Economic Policy Research - UK; Universite Libre de Bruxelles; Solvay SA	Kretschmer, T (corresponding author), Ludwig Maximilians Univ Munchen, Inst Strategy Technol & Org, D-80539 Munich, Germany.	nicolas.van.zeebroeck@ulb.be; t.kretschmer@lmu.de; bughinjacquesrenejean@gmail.com		Bughin, Jacques/0000-0002-1973-3656; van Zeebroeck, Nicolas/0000-0003-3079-7877	Advanced Studies at LMU	Advanced Studies at LMU	Y Manuscript received April 15, 2020; revised October 26, 2020 and April 6, 2021; accepted April 29, 2021. The work of Kretschmer was supported by the Advanced Studies at LMU. Review of this article was arranged by Department Editor T. Ravichandran. (Corresponding author: Tobias Kretschmer.)		48	10	10	58	166	IEEE-INST ELECTRICAL ELECTRONICS ENGINEERS INC	PISCATAWAY	445 HOES LANE, PISCATAWAY, NJ 08855-4141 USA	0018-9391	1558-0040		IEEE T ENG MANAGE	IEEE Trans. Eng. Manage.	SEP	2023	70	9
J	Rezende, DA; Madeira, GD; Mendes, LD; Breda, GD; Zarpelao, BB; Figueiredo, FD				Rezende, Denis Alcides; Madeira, Gilberto dos Santos; Mendes, Leonardo de Souza; Breda, Gean Davis; Zarpelao, Bruno Bogaz; Figueiredo, Frederico de Carvalho			Information and Telecommunications Project for a Digital City: A Brazilian case study	TELEMATICS AND INFORMATICS			English	Article						Municipal Information Planning; Telecommunications; Open Access Metropolitan Area Network; Strategic Digital City; Municipal management	BROAD-BAND; TECHNOLOGY; ACCESS; GOVERNMENT; FUTURE; CITIES; MODEL	Making information and telecommunications available is a permanent challenge for cities concerned to their social, urban and local planning and development, focused on life quality of their citizens and on the effectiveness of public management. Such a challenge requires the involvement of everyone in the city. The objective is to describe the information and telecommunications project from the p…	[Rezende, Denis Alcides; Figueiredo, Frederico de Carvalho] Pontificia Univ Catolica Parana PUCPR, Postgrad Program Urban Management, Curitiba, Parana, Brazil; [Madeira, Gilberto dos Santos; Mendes, Leonardo de Souza; Breda, Gean Davis; Zarpelao, Bruno Bogaz] Univ Campinas UNICAMP, Sch Elect & Comp Engn, Campinas, SP, Brazil	Pontificia Universidade Catolica do Parana; Universidade Estadual de Campinas	Rezende, DA (corresponding author), Pontificia Univ Catolica Parana PUCPR, Postgrad Program Urban Management, Curitiba, Parana, Brazil.	denis.rezende@pucpr.br; gilmadeira@uol.com.br; lmendes@decom.fee.unicamp.br; gean@decom.fee.unicamp.br; bzarpe@decom.fee.unicamp.br; frederico.figueiredo@pucpr.br	Zarpelão, Bruno B./D-6845-2013; Rezende, Denis Alcides/AAR-2488-2021	Rezende, Denis Alcides/0000-0002-3327-0424; MENDES, LEONARDO/0000-0001-6712-2203; Bogaz Zarpelao, Bruno/0000-0001-9172-3578					68	10	12	2	45	ELSEVIER SCIENCE BV	AMSTERDAM	PO BOX 211, 1000 AE AMSTERDAM, NETHERLANDS	0736-5853			TELEMAT INFORM	Telemat. Inform.	FEB	2014	31	1
J	Xu, YT; Li, TH				Xu, Yanting; Li, Tinghui			Measuring digital economy in China	NATIONAL ACCOUNTING REVIEW			English	Article						digital economy; index compilation; entropy grey target method; sigma convergence; cluster analysis	CONSTRUCTION; INDEX	The COVID-19 pandemic has highlighted the importance of the digital economy in restoring economic and social development, creating more jobs and improving people's well-being. To inform policy makers about changes to digital strategies, measuring the digital economy is a prerequisite. This study aimed to compile an index of digital economy at the provincial (municipalities, autonomous regions, co…	[Xu, Yanting; Li, Tinghui] Guangzhou Univ, Sch Econ & Stat, Guangzhou 510006, Peoples R China	Guangzhou University	Li, TH (corresponding author), Guangzhou Univ, Sch Econ & Stat, Guangzhou 510006, Peoples R China.	lith@gzhu.edu.cn			Guangzhou University	Guangzhou University	The authors would like to thank Guangzhou University for sponsoring this research.		33	9	9	38	56	AMER INST MATHEMATICAL SCIENCES-AIMS	SPRINGFIELD	PO BOX 2604, SPRINGFIELD, MO 65801-2604, UNITED STATES		2689-3010		NATL ACCOUNT REV	Natl. Account. Rev.		2022	4	3
J	Benesová, A; Basl, J; Tupa, J; Steiner, F				Benesova, Andrea; Basl, Josef; Tupa, Jiri; Steiner, Frantisek			Design of a business readiness model to realise a green industry 4.0 company	INTERNATIONAL JOURNAL OF COMPUTER INTEGRATED MANUFACTURING			English	Article						Industry 4.0; maturity model of industry 4.0; green; sustainable manufacturing; sustainability carbon neutrality	MATURITY MODEL	The paper reports research on the implementation of green aspects into the latest industrial revolution called Industry 4.0 and proposes the design of a business readiness level model for Industry 4.0. The analysis is based on the available maturity models for Industry 4.0, which are investigated to determine whether and to what extent they fulfil the 'green' trends by their name, content or spec…	[Benesova, Andrea; Tupa, Jiri; Steiner, Frantisek] Univ West Bohemia, Fac Elect Engn, Dept Mat & Technol, Plzen, Czech Republic; [Basl, Josef] Univ West Bohemia, Fac Mech Engn, Dept Ind Engn & Management, Plzen, Czech Republic	University of West Bohemia Pilsen; University of West Bohemia Pilsen	Benesová, A (corresponding author), Univ West Bohemia, Fac Elect Engn, Dept Mat & Technol, Plzen, Czech Republic.	benesov2@rek.zcu.cz	Tupa, Jiri/P-1692-2016; Steiner, Frantisek/M-8283-2014; Benešová, Andrea/JER-5311-2023	Tupa, Jiri/0000-0002-4329-5406; Steiner, Frantisek/0000-0002-5702-7015; Benesova, Andrea/0000-0003-0879-7846	Software platform for Implementation Accelerating of Process Control and Automation Systems [TH02010577]; Student Grant Agency of the University of West Bohemia in Pilsen [SGS-2021-003]	Software platform for Implementation Accelerating of Process Control and Automation Systems; Student Grant Agency of the University of West Bohemia in Pilsen	This work was supported by the Software platform for Implementation Accelerating of Process Control and Automation Systems [TH02010577] and funding of Student Grant Agency of the University of West Bohemia in Pilsen, No. SGS-2021-003 Materials, technologies and diagnostics in electrical engineering.		37	9	9	10	52	TAYLOR & FRANCIS LTD	ABINGDON	2-4 PARK SQUARE, MILTON PARK, ABINGDON OR14 4RN, OXON, ENGLAND	0951-192X	1362-3052		INT J COMPUT INTEG M	Int. J. Comput. Integr. Manuf.	SEP 2	2021	34	9
J	Zaman, M; Vo-Thanh, T; Hasan, R; Babu, MM				Zaman, Mustafeed; Vo-Thanh, Tan; Hasan, Rajibul; Mohiuddin Babu, Mujahid			Mobile channel as a strategic distribution channel in times of crisis: a self-determination theory perspective	JOURNAL OF STRATEGIC MARKETING			English	Article; Early Access						Multi-channel; omni-channel; mobile channel; Too Good To Go (TGTG) app; self-determination theory; motives	INTEGRATION QUALITY; PRODUCT DESIGN; EXPERIENCE; ADOPTION; AGENDA; FUTURE; NEEDS; APPS	The Covid-19 pandemic has profoundly disrupted the worldwide economy, particularly the restaurant sector. To face these challenges, the multi- and omni-channel approaches have been embraced by several firms, especially with the integration of mobile channels and social media. However, no research is conducted to investigate how this integration can be successful in times of crisis, such as pandem…	[Zaman, Mustafeed] Normandie Business Sch, Metis Lab, Dept Mkt, Le Havre, France; [Vo-Thanh, Tan] CERIIM, Excelia Grp, Dept Mkt, La Rochelle, France; [Vo-Thanh, Tan] CEREGE EA 1722, La Rochelle, France; [Hasan, Rajibul] Maynooth Univ, Dept Mkt, Maynooth, Kildare, Ireland; [Mohiuddin Babu, Mujahid] Coventry Univ, Dept Mkt, Coventry, W Midlands, England	Maynooth University; Coventry University	Zaman, M (corresponding author), Normandie Business Sch, Metis Lab, Dept Mkt, Le Havre, France.	mzaman@em-normandie.fr	Zaman, Mustafeed/ABA-1317-2021; Vo-Thanh, Tan/O-5735-2019	Zaman, Mustafeed/0000-0002-8582-9445; Vo-Thanh, Tan/0000-0001-9964-3724; Mohiuddin Babu, Mujahid/0000-0001-6952-0723; Hasan, Rajibul/0000-0002-1290-4627					42	9	9	1	16	ROUTLEDGE JOURNALS, TAYLOR & FRANCIS LTD	ABINGDON	2-4 PARK SQUARE, MILTON PARK, ABINGDON OX14 4RN, OXON, ENGLAND	0965-254X	1466-4488		J STRATEG MARK	J. Strateg. Mark.	2021 JUL 29	2021
J	Donida, B; da Costa, CA; Scherer, JN				Donida, Bruna; da Costa, Cristiano Andre; Scherer, Juliana Nichterwitz			Making the COVID-19 Pandemic a Driver for Digital Health: Brazilian Strategies	JMIR PUBLIC HEALTH AND SURVEILLANCE			English	Article						COVID-19; digital technology; Brazil; public health; medical informatics; digital health; strategy; outbreak; system; data; health data; implementation; monitoring		The COVID-19 outbreak exposed several problems faced by health systems worldwide, especially concerning the safe and rapid generation and sharing of health data. However, this pandemic scenario has also facilitated the rapid implementation and monitoring of technologies in the health field. In view of the occurrence of the public emergency caused by SARS-CoV-2 in Brazil, the Department of Informa…	[Donida, Bruna; da Costa, Cristiano Andre; Scherer, Juliana Nichterwitz] Univ Vale do Rio dos Sinos, SOFTWARELAB Software Innovat Lab, Av Unisinos 950, BR-93022750 Sao Leopoldo, Brazil		da Costa, CA (corresponding author), Univ Vale do Rio dos Sinos, SOFTWARELAB Software Innovat Lab, Av Unisinos 950, BR-93022750 Sao Leopoldo, Brazil.	cac@unisinos.br	da Costa, Cristiano André/AAV-1894-2020; Scherer, Juliana/M-6344-2016	da Costa, Cristiano André/0000-0003-3859-6199; Donida, Bruna/0000-0001-6346-5153; Scherer, Juliana/0000-0002-9235-0416	Coordenacao de Aperfeicoamento de Pessoal de Nivel Superior (CAPES) -Brasil [001]	Coordenacao de Aperfeicoamento de Pessoal de Nivel Superior (CAPES) -Brasil(Coordenacao de Aperfeicoamento de Pessoal de Nivel Superior (CAPES))	The authors would like to acknowledge the efforts of all Brazilian public servants during this pandemic crisis. This study was financed in part by the Coordenacao de Aperfeicoamento de Pessoal de Nivel Superior (CAPES) -Brasil, Finance Code 001.		29	9	9	3	10	JMIR PUBLICATIONS, INC	TORONTO	130 QUEENS QUAY E, STE 1102, TORONTO, ON M5A 0P6, CANADA	2369-2960			JMIR PUBLIC HLTH SUR	JMIR Public Health Surveill.	JUN	2021	7	6
J	Alizadeh, T				Alizadeh, Tooran			Urban Digital Strategies: Planning in the Face of Information Technology?	JOURNAL OF URBAN TECHNOLOGY			English	Article						Digital strategy; urban; digital economy; Brisbane; Vancouver	CROSS-NATIONAL RESEARCH; SMART CITIES; ECONOMIC-DEVELOPMENT; E-GOVERNMENT; CITY; MANAGEMENT; UNIVERSITY; KNOWLEDGE; BUSINESS; INDUSTRY	A growing number of cities around the world have now developed urban digital strategies to speed up the pace of change, and more importantly to move their digital planning and policymaking from ad-hoc to an integrated and strategic approach. The paper provides a cross-national comparative study, based on recently developed urban digital strategies in Brisbane, Australia and Vancouver, Canada. The…	[Alizadeh, Tooran] Griffith Univ, Urban Res Program, 170 Kessels Rd, Nathan, Qld 4111, Australia	Griffith University	Alizadeh, T (corresponding author), Griffith Univ, Urban Res Program, 170 Kessels Rd, Nathan, Qld 4111, Australia.	t.alizadeh@griffith.edu.au	Alizadeh, Tooran/AAX-2371-2020	Alizadeh, Tooran/0000-0001-5424-3348					87	9	9	2	47	ROUTLEDGE JOURNALS, TAYLOR & FRANCIS LTD	ABINGDON	2-4 PARK SQUARE, MILTON PARK, ABINGDON OX14 4RN, OXON, ENGLAND	1063-0732	1466-1853		J URBAN TECHNOL	J. Urban Technol.		2017	24	2
J	Alizadeh, T; Sipe, N				Alizadeh, Tooran; Sipe, Neil			Vancouver's Digital Strategy: Disruption, New Direction, or Business as Usual?	INTERNATIONAL JOURNAL OF E-PLANNING RESEARCH			English	Article						Digital Strategy; Green City; Planning; Smart City; Telecommunication; Vancouver	LOCAL E-GOVERNMENT; PARTICIPATION; GOVERNANCE; CITIES	A growing number of cities have started to realize the need to be 'smart', to use digital technology to drive prosperity and capitalize on the rapidly growing digital economy. Some local governments have developed 'urban digital strategies' to speed up the pace of change, and to move their digital planning from ad-hoc to an integrated and strategic approach. This paper examines Vancouver's Digita…	[Alizadeh, Tooran] Griffith Univ, Brisbane, Qld, Australia; [Sipe, Neil] Univ Queensland, Brisbane, Qld, Australia	Griffith University; University of Queensland	Alizadeh, T (corresponding author), Griffith Univ, Brisbane, Qld, Australia.		Sipe, Neil G./A-4052-2009; Alizadeh, Tooran/AAX-2371-2020	Sipe, Neil G./0000-0002-3228-3768;					67	9	9	0	20	IGI GLOBAL	HERSHEY	701 E CHOCOLATE AVE, STE 200, HERSHEY, PA 17033-1240 USA	2160-9918	2160-9926		INT J E-PLAN RES	Int. J. E-Plan. Res.	OCT-DEC	2016	5	4
J	Vasicek, Z; Bidlo, M; Sekanina, L				Vasicek, Zdenek; Bidlo, Michal; Sekanina, Lukas			Evolution of efficient real-time non-linear image filters for FPGAs	SOFT COMPUTING			English	Article						Non-linear image filter; Noise removal; Cartesian genetic programming; Evolutionary design; Digital circuit	EVOLVABLE HARDWARE; DESIGN; IMPLEMENTATION	Image processing represents a research field in which high-quality solutions have been obtained using various soft computing techniques. Evolutionary algorithms constitute a class of stochastic search methods that are applicable in both optimization and design tasks. In the area of circuit design Cartesian Genetic Programming has often been utilized in combination with an algorithm of Evolutionar…	[Vasicek, Zdenek; Bidlo, Michal; Sekanina, Lukas] Brno Univ Technol, Fac Informat Technol, Ctr Excellence IT4Innovat, Brno 61266, Czech Republic	Brno University of Technology	Sekanina, L (corresponding author), Brno Univ Technol, Fac Informat Technol, Ctr Excellence IT4Innovat, Bozetechova 2, Brno 61266, Czech Republic.	vasicek@fit.vutbr.cz; bidlom@fit.vutbr.cz; sekanina@fit.vutbr.cz	Sekanina, Lukas/E-8394-2014; Vasicek, Zdenek/A-3655-2016; Bidlo, Michal/GRS-4501-2022	Sekanina, Lukas/0000-0002-2693-9011; Vasicek, Zdenek/0000-0002-2279-5217;	Czech Science Foundation [GP103/10/1517]; IT4Innovations Centre of Excellence [CZ.1.05/1.1.00/02.0070]	Czech Science Foundation(Grant Agency of the Czech Republic); IT4Innovations Centre of Excellence	This work was partially supported by the Czech Science Foundation project GP103/10/1517 Natural Computing on Unconventional Platforms and the IT4Innovations Centre of Excellence CZ.1.05/1.1.00/02.0070.		29	9	10	2	9	SPRINGER	NEW YORK	233 SPRING ST, NEW YORK, NY 10013 USA	1432-7643	1433-7479		SOFT COMPUT	Soft Comput.	NOV	2013	17	11
J	Stiakakis, E; Georgiadis, CK				Stiakakis, Emmanouil; Georgiadis, Christos K.			Drivers of a tourism e-business strategy: the impact of information and communication technologies	OPERATIONAL RESEARCH			English	Article						E-tourism; E-business technology; Digital strategy; ICT; Dynamic packaging		The possible interactions among tourism organizations, their customers and other organizations are considered in this article. Based on these interactions, three drivers of an integrated e-business strategy in the tourism sector are suggested: (1) customizing tourist products, personalizing services and supporting mobile services, (2) sharing tourism information and operational data, and (3) offe…	[Stiakakis, Emmanouil; Georgiadis, Christos K.] Univ Macedonia, Dept Appl Informat, Thessaloniki 54006, Greece	University of Macedonia	Georgiadis, CK (corresponding author), Univ Macedonia, Dept Appl Informat, 156 Egnatia Str, Thessaloniki 54006, Greece.	geor@uom.gr; stiakakis@uom.gr	GEORGIADIS, CHRISTOS Κ./AAM-7076-2021	GEORGIADIS, CHRISTOS Κ./0000-0003-0897-9009					22	9	10	1	52	SPRINGER HEIDELBERG	HEIDELBERG	TIERGARTENSTRASSE 17, D-69121 HEIDELBERG, GERMANY	1109-2858	1866-1505		OPER RES-GER	Oper. Res.	AUG	2011	11	2
J	Sakas, DP; Giannakopoulos, NT; Terzi, MC; Kamperos, IDG; Nasiopoulos, DK; Reklitis, DP; Kanellos, N				Sakas, Damianos P.; Giannakopoulos, Nikolaos T.; Terzi, Marina C.; Kamperos, Ioannis Dimitrios G.; Nasiopoulos, Dimitrios K.; Reklitis, Dimitrios P.; Kanellos, Nikos			Social Media Strategy Processes for Centralized Payment Network Firms after a War Crisis Outset	PROCESSES			English	Article						strategic digital marketing; social media strategy; sustainable supply chain; innovation process; crisis; risk management; centralized payment networks (CPN); big data; fuzzy applications; decision support systems	ORGANIZATIONAL CULTURE; INNOVATION; ANALYTICS; WEBSITES; DISASTER; IMPACT; RISK; ENGAGEMENT; CONSUMERS; FINTECH	From the outset of the war in Ukraine, extensive crises in many sectors of the world economy have occurred, with firms offering services and products both online and through physical stores facing serious problems. These problems are mainly related to higher operational costs and the lack of website visibility. For this research study, centralized payment network organizations (CPNs), firms provi…	[Sakas, Damianos P.; Giannakopoulos, Nikolaos T.; Terzi, Marina C.; Kamperos, Ioannis Dimitrios G.; Nasiopoulos, Dimitrios K.; Reklitis, Dimitrios P.; Kanellos, Nikos] Agr Univ Athens, Sch Appl Econ & Social Sci, Dept Agribusiness & Supply Chain Management, BICTEVAC LAB,Business Informat & Commun Tech Valu, Athens 11855, Greece	Agricultural University of Athens	Giannakopoulos, NT; Reklitis, DP (corresponding author), Agr Univ Athens, Sch Appl Econ & Social Sci, Dept Agribusiness & Supply Chain Management, BICTEVAC LAB,Business Informat & Commun Tech Valu, Athens 11855, Greece.	n.giannakopoulos@aua.gr; drekleitis@aua.gr	KAMPEROS, IOANNIS/JOJ-6198-2023; REKLITIS, Dimitrios P./HDO-1260-2022; Giannakopoulos, Nikolaos/HZJ-9352-2023	REKLITIS, Dimitrios P./0000-0001-6857-6012; Sakas, Damianos/0000-0002-2253-8966; KAMPEROS, IOANNIS DIMITRIOS/0000-0002-0760-3360; Nasiopoulos, Dimitrios/0000-0001-7386-1029; Giannakopoulos, Nikolaos T./0000-0002-4480-5893					108	8	8	6	8	MDPI	BASEL	ST ALBAN-ANLAGE 66, CH-4052 BASEL, SWITZERLAND		2227-9717		PROCESSES	Processes	OCT	2022	10	10
J	García, A; Bregon, A; Martínez-Prieto, MA				Garcia, Alvaro; Bregon, Anibal; Martinez-Prieto, Miguel A.			A non-intrusive Industry 4.0 retrofitting approach for collaborative maintenance in traditional manufacturing	COMPUTERS & INDUSTRIAL ENGINEERING			English	Article						Digital retrofitting; Collaborative maintenance; Industry 4; 0; Human -machine interfaces; Traditional manufacturing; Non-intrusive sensors	PREDICTIVE MAINTENANCE; INTELLIGENT; MANAGEMENT; FRAMEWORK; MACHINE; SYSTEMS; BARRIERS; MODELS	The recent COVID-19 outbreak impact on the world economy has boosted the increasing business needs to force manufacturing plants adapting to unpredictable changes and ensuring the continuity of industrial production. The demand for asset monitoring solutions and specialised support at the shop floor has become an increasingly important digital priority in industry that pushes human-machine techno…	[Garcia, Alvaro] Fdn Cidaut, ICT Ind 4 0 Area, Valladolid, Spain; [Garcia, Alvaro; Bregon, Anibal; Martinez-Prieto, Miguel A.] Univ Valladolid, Dept Informat, Valladolid, Spain	Universidad de Valladolid	García, A (corresponding author), Fdn Cidaut, ICT Ind 4 0 Area, Valladolid, Spain.	alvgar@cidaut.es; anibal@infor.uva.es; migumar2@infor.uva.es	Martínez-Prieto, Miguel A./A-4891-2011; Bregon, Anibal/R-6700-2018	Martínez-Prieto, Miguel A./0000-0003-4418-561X; Bregon, Anibal/0000-0001-6752-1159; Garcia, Alvaro/0000-0002-8628-3405	Regional Funding Agency Institute for Business Competitiveness of Castile Leon (iDIGIT4L project) [CCTT1/17/VA/0007]; FEDER funds	Regional Funding Agency Institute for Business Competitiveness of Castile Leon (iDIGIT4L project); FEDER funds(European Union (EU))	This work was supported by Spanish funds through Regional Funding Agency Institute for Business Competitiveness of Castile Leon (iDIGIT4L project, exp. number: CCTT1/17/VA/0007), co-financed with FEDER funds, budget line Applied R&D projects carried out by technology centers. Call 2017.		61	8	8	7	31	PERGAMON-ELSEVIER SCIENCE LTD	OXFORD	THE BOULEVARD, LANGFORD LANE, KIDLINGTON, OXFORD OX5 1GB, ENGLAND	0360-8352	1879-0550		COMPUT IND ENG	Comput. Ind. Eng.	FEB	2022	164
J	Yan, MR; Hong, LY; Warren, K				Yan, Min-Ren; Hong, Lin-Ya; Warren, Kim			Integrated knowledge visualization and the enterprise digital twin system for supporting strategic management decision	MANAGEMENT DECISION			English	Article						Knowledge visualization; Digital twin; Strategy; Decision support; System dynamics (SD); Digital transformation; Performance management; Innovation; Data analytics; Dynamic capability	WEB-BASED SIMULATIONS; BIG DATA ANALYTICS; DYNAMIC CAPABILITIES; FLIGHT SIMULATORS; PROJECT PERFORMANCE; BUSINESS MODEL; INNOVATION; TECHNOLOGIES; SUSTAINABILITY; COMMUNICATION	Purpose This paper proposes an integrated knowledge visualization and digital twin system for supporting strategic management decisions. The concepts and applications of strategic architecture have been illustrated with a concrete real-world case study and decision rules of using the strategic digital twin management decision system (SDMDS) as a more visualized, adaptive and effective model for d…	[Yan, Min-Ren] Chinese Culture Univ, Coll Business, Taipei, Taiwan; [Hong, Lin-Ya] Georg August Univ Goettingen, Human Resources Management & Asian Business, Gottingen, Germany; [Warren, Kim] Strategy Dynam Ltd, Bletchley, Bucks, England; [Warren, Kim] London Business Sch, Strategy Fac, London, England	Chinese Culture University; University of Gottingen; University of London; London Business School	Yan, MR (corresponding author), Chinese Culture Univ, Coll Business, Taipei, Taiwan.	ymr3@faculty.pccu.edu.tw; linya.hong@stud.uni-goettingen.de; kim@strategydynamics.com		Yan, Min-Ren/0000-0002-8270-9763; Hong, Lin-Ya/0000-0001-5032-3682					72	8	8	35	164	EMERALD GROUP PUBLISHING LTD	BINGLEY	HOWARD HOUSE, WAGON LANE, BINGLEY BD16 1WA, W YORKSHIRE, ENGLAND	0025-1747	1758-6070		MANAGE DECIS	Manag. Decis.	MAR 21	2022	60	4
J	Martínez, ON; García, JI; Salcedo, VT				Navarro Martinez, Olga; Igual Garcia, Jorge; Traver Salcedo, Vicente			Estimating Patient Empowerment and Nurses' Use of Digital Strategies: eSurvey Study	INTERNATIONAL JOURNAL OF ENVIRONMENTAL RESEARCH AND PUBLIC HEALTH			English	Article						health literacy; digital literacy; digital skills; patient empowerment	HEALTH INFORMATION-SEEKING; SOCIAL NETWORKS; INTERNET; CHALLENGES; EXPERIENCE; COPD	Patient empowerment is seen as the capability to understand health information and make decisions based on it. It is a competence that can improve self-care, adherence and overall health. The COVID-19 pandemic has increased the need for information and has also reduced the number of visits to health centers. Nurses have had to adapt in order to continue offering quality care in different environm…	[Navarro Martinez, Olga] Catholic Univ Valencia, Dept Nursing, Valencia 46007, Spain; [Navarro Martinez, Olga; Traver Salcedo, Vicente] Univ Politecn Valencia, Inst ITACA, Valencia 46022, Spain; [Igual Garcia, Jorge] Univ Politecn Valencia, Inst Telecomunicac & Aplicac Multimedia ITEAM, Dept Comunicac, Valencia 46022, Spain	Universidad Catolica de Valencia San Vicente Martir; Universitat Politecnica de Valencia; Universitat Politecnica de Valencia	Martínez, ON (corresponding author), Catholic Univ Valencia, Dept Nursing, Valencia 46007, Spain.;Martínez, ON (corresponding author), Univ Politecn Valencia, Inst ITACA, Valencia 46022, Spain.	olga.navarro@ucv.es; jigual@dcom.upv.es; vtraver@itaca.upv.es	Navarro Martínez, Olga/HDN-2718-2022; Traver, Vicente/B-8139-2015	Navarro Martínez, Olga/0000-0003-3563-4129; Igual, Jorge/0000-0003-3408-4014; Traver, Vicente/0000-0003-1806-8575					52	8	8	1	11	MDPI	BASEL	ST ALBAN-ANLAGE 66, CH-4052 BASEL, SWITZERLAND		1660-4601		INT J ENV RES PUB HE	Int. J. Environ. Res. Public Health	SEP	2021	18	18
J	Bonacini, E; Giaccone, SC				Bonacini, Elisa; Giaccone, Sonia Caterina			Gamification and cultural institutions in cultural heritage promotion: a successful example from Italy	CULTURAL TRENDS			English	Article						Gamification; serious games; cultural institutions; digital heritage; digital marketing; game tourism		This article deals with the application of serious games to cultural heritage. Through an overview of the growing importance of gamification in promoting cultural sites and museum collections, the research highlights the changing practices of cultural institutions, which are increasingly involved in producing serious games, considering them as strategic digital marketing tools to promote cultural…	[Bonacini, Elisa] Univ S Florida, Dept Hist, Inst Digital Explorat IDEx, 4202 E Fowler Ave, Tampa, FL 33620 USA; [Bonacini, Elisa] Univ Cordoba, Escuelas Doctorado, Cordoba, Spain; [Giaccone, Sonia Caterina] Univ Catania, Dept Econ & Business, Catania, Italy	State University System of Florida; University of South Florida; Universidad de Cordoba; University of Catania	Bonacini, E (corresponding author), Univ S Florida, Dept Hist, Inst Digital Explorat IDEx, 4202 E Fowler Ave, Tampa, FL 33620 USA.;Bonacini, E (corresponding author), Univ Cordoba, Escuelas Doctorado, Cordoba, Spain.	e_bonacini@hotmail.com	Bonacini, Elisa/IRZ-6023-2023	BONACINI, Elisa/0000-0001-6987-6180; GIACCONE, Sonia Caterina/0000-0002-4422-9566					53	8	8	20	92	ROUTLEDGE JOURNALS, TAYLOR & FRANCIS LTD	ABINGDON	2-4 PARK SQUARE, MILTON PARK, ABINGDON OX14 4RN, OXON, ENGLAND	0954-8963	1469-3690		CULT TRENDS	Cult. Trends	JAN 1	2022	31	1
J	Bonfanti, S; Guerra, R; Zaiser, M; Zapperi, S				Bonfanti, Silvia; Guerra, Roberto; Zaiser, Michael; Zapperi, Stefano			Digital strategies for structured and architected materials design	APL MATERIALS			English	Article							MECHANICAL METAMATERIALS; NACRE; SIMULATION; PRINCIPLES; OPTIMIZATION; COMPOSITES; ELASTICITY; HIERARCHY; BREAKDOWN; TI-6AL-4V	Designing materials with tailored structural or functional properties is a fundamental goal of materials science and engineering. A vast research activity is currently devoted to achieving metamaterials with superior properties and optimized functionalities by carefully fine tuning both the microstructure and geometry of the material. Here, we discuss the impact of digital technologies in this re…	[Bonfanti, Silvia; Guerra, Roberto; Zapperi, Stefano] Univ Milan, Dept Phys, Ctr Complex & Biosyst, Via Celoria 16, I-20133 Milan, Italy; [Zaiser, Michael] Friedrich Alexander Univ Erlangen Nurnberg, Dept Mat Sci, Inst Mat Simulat, Dr Mack Str 77, D-90762 Furth, Germany; [Zapperi, Stefano] CNR, Ist Chim Mat Condensata & Tecnol Energia, Via R Cozzi 53, I-20125 Milan, Italy	University of Milan; University of Erlangen Nuremberg; Consiglio Nazionale delle Ricerche (CNR); Istituto di Chimica della Materia Condensata e di Tecnologie per l Energia (ICMATE-CNR)	Zapperi, S (corresponding author), Univ Milan, Dept Phys, Ctr Complex & Biosyst, Via Celoria 16, I-20133 Milan, Italy.;Zapperi, S (corresponding author), CNR, Ist Chim Mat Condensata & Tecnol Energia, Via R Cozzi 53, I-20125 Milan, Italy.	zaiser@fau.de; stefano.zapperi@unimi.it	Bonfanti, Silvia/ABF-7621-2021; Zapperi, Stefano/C-9473-2009	Bonfanti, Silvia/0000-0002-0323-8714; Zapperi, Stefano/0000-0001-5692-5465; Guerra, Roberto/0000-0002-1278-8021	European Research Council [841640 METADESIGN]; Alexander von Humboldt Foundation	European Research Council(European Research Council (ERC)); Alexander von Humboldt Foundation(Alexander von Humboldt Foundation)	S.B., R.G., and S.Z. were supported by the European Research Council through the Proof of Concept Grant 841640 METADESIGN. S.Z. also acknowledges support from the Alexander von Humboldt Foundation through the Humboldt Research Award and thanks Friedrich-Alexander-Universitat Erlangen-Nurnberg for hospitality.		160	8	8	2	39	AIP Publishing	MELVILLE	1305 WALT WHITMAN RD, STE 300, MELVILLE, NY 11747-4501 USA	2166-532X			APL MATER	APL Mater.	FEB 1	2021	9	2
J	Bonnevie, E; Lloyd, TD; Rosenberg, SD; Williams, K; Goldbarg, J; Smyser, J				Bonnevie, Erika; Lloyd, Tiffany D.; Rosenberg, Sarah D.; Williams, Kara; Goldbarg, Jaclyn; Smyser, Joe			Layla's Got You: Developing a tailored contraception chatbot for Black and Hispanic young women	HEALTH EDUCATION JOURNAL			English	Article						Chatbots; contraception; health communication; health disparities; technology		Introduction: In Onondaga County, New York, around half of all births to Black and Hispanic teenage girls are unintended. The Layla's Got You campaign consists of a chatbot and social media campaign designed to increase contraception knowledge among 16- to 25-year-old Black and Hispanic women in Onondaga County. Methods: The campaign was co-created with local women in the target audience and empl…	[Bonnevie, Erika; Rosenberg, Sarah D.; Goldbarg, Jaclyn; Smyser, Joe] Publ Good Projects, 2308 Mt Vernon Ave,Suite 758, Alexandria, VA 22301 USA; [Lloyd, Tiffany D.; Williams, Kara] Allyn Family Fdn, Syracuse, NY USA		Bonnevie, E (corresponding author), Publ Good Projects, 2308 Mt Vernon Ave,Suite 758, Alexandria, VA 22301 USA.	erika.bonnevie@publicgoodprojects.org			Allyn Family Foundation	Allyn Family Foundation	The author(s) disclosed receipt of the following financial support for the research, authorship, and/or publication of this article. This work was supported by the Allyn Family Foundation, Skaneateles, New York.		38	8	8	2	14	SAGE PUBLICATIONS LTD	LONDON	1 OLIVERS YARD, 55 CITY ROAD, LONDON EC1Y 1SP, ENGLAND	0017-8969	1748-8176		HEALTH EDUC J	Health Educ. J.	JUN	2021	80	4
J	Thomas, A				Thomas, Ashish			Convergence and digital fusion lead to competitive differentiation	BUSINESS PROCESS MANAGEMENT JOURNAL			English	Article; Proceedings Paper	10th Canadian Quality Congress	SEP 24-25, 2018	Simon Fraser Univ, Vancouver, CANADA		Simon Fraser Univ	Convergence; Open innovation; Digital technology; Agile synergistic interaction; Business and technology management; Digital fusion	OPEN-INNOVATION; OPERATIONS-MANAGEMENT; EMPIRICAL-RESEARCH; FUTURE; STRATEGY	Purpose Organizations are consistently seeking innovative strategies and novel pathways to enhance business processes and create differentiation. The global business ecosystem is changing and there is growing demand for multi-modal digital technologies, big data consolidation and data analytics to harness a cost-competitive agile system. Technological convergence and integration of digital system…	[Thomas, Ashish] Concordia Univ Edmonton, Dept Management, Edmonton, AB, Canada		Thomas, A (corresponding author), Concordia Univ Edmonton, Dept Management, Edmonton, AB, Canada.	ashish.thomas@concordia.ab.ca	N'Dri, Amoin Bernadine/IWD-7811-2023						40	8	9	6	69	EMERALD GROUP PUBLISHING LTD	BINGLEY	HOWARD HOUSE, WAGON LANE, BINGLEY BD16 1WA, W YORKSHIRE, ENGLAND	1463-7154	1758-4116		BUS PROCESS MANAG J	Bus. Process. Manag. J.	JUN 15	2020	26	3
J	McGrath, R; McManus, R				McGrath, Rita; McManus, Ryan			Digital Transformation LEARNING YOUR WAY TO A NEW BUSINESS MODEL What's your digital strategy?	HARVARD BUSINESS REVIEW			English	Article									[McGrath, Rita; McManus, Ryan] Columbia Business Sch, New York, NY 10027 USA	Columbia University	McGrath, R (corresponding author), Columbia Business Sch, New York, NY 10027 USA.								0	8	8	13	157	HARVARD BUSINESS SCHOOL PUBLISHING CORPORATION	WATERTOWN	300 NORTH BEACON STREET, WATERTOWN, MA 02472 USA	0017-8012			HARVARD BUS REV	Harv. Bus. Rev.	MAY-JUN	2020	98	3
J	Chester, J; Montgomery, KC				Chester, Jeff; Montgomery, Kathryn C.			The digital commercialisation of US politics - 2020 and beyond	INTERNET POLICY REVIEW			English	Article						Advertising; Elections; Micro-targeting; Privacy	PRIVACY	The same micro-targeted programmatic advertising that has become central to the digital media and marketing ecosystem has now migrated into election campaigns in the US and elsewhere, raising a host of issues around privacy, discrimination, and manipulation. This paper examines the digital strategies and technologies of today's political campaigns, explaining how they will be deployed in the upco…	[Chester, Jeff] Ctr Digital Democracy, Washington, DC 20006 USA; [Montgomery, Kathryn C.] Amer Univ, Sch Commun, Washington, DC USA	American University	Chester, J (corresponding author), Ctr Digital Democracy, Washington, DC 20006 USA.	jeff@democraticmedia.org; kcm@american.edu							119	8	8	3	7	ALEXANDER VON HUMBOLDT INST INTERNET & SOC	BERLIN	OBERWALLSTRASSE 9, BERLIN, 10117, GERMANY	2197-6775			INTERNET POLICY REV	Internet Policy Rev.		2019	8	4
J	Childers, CC; Haley, E; McMillan, S				Childers, Courtney Carpenter; Haley, Eric; McMillan, Sally			Achieving Strategic Digital Integration: Views From Experienced New York City Advertising Agency Professionals	JOURNAL OF CURRENT ISSUES AND RESEARCH IN ADVERTISING			English	Article							MARKETING COMMUNICATIONS IMC	The advertising agency environment is changing and requires agencies to deal with many communications opportunities in emerging platforms. Many concepts from IMC (e.g., the importance of data-driven targeting and integrated communication across disciplinary boundaries) have carried forward to the digital era. While academic literature has begun to examine the impact of digital technology on commu…	[Childers, Courtney Carpenter; Haley, Eric; McMillan, Sally] Univ Tennessee, Sch Advertising & Publ Relat, Knoxville, TN 37996 USA	University of Tennessee System; University of Tennessee Knoxville	Childers, CC (corresponding author), Univ Tennessee, Sch Advertising & Publ Relat, Knoxville, TN 37996 USA.	childers@utk.edu							59	8	8	2	6	TAYLOR & FRANCIS LTD	ABINGDON	2-4 PARK SQUARE, MILTON PARK, ABINGDON OR14 4RN, OXON, ENGLAND	1064-1734	2164-7313		J CURR ISS RES AD	J. Curr. Issues Res. Advert.		2018	39	3
J	König, PD				Koenig, Pascal D.			The place of conditionality and individual responsibility in a data-driven economy	BIG DATA & SOCIETY			English	Article						Digital economy; information and communication technologies; conditionality; individual responsibility; data protection; value creation	BIG DATA; SELF-TRACKING; DATA PROTECTION; WELFARE-REFORM; POLICY; PRIVACY; DISCOURSE; POLITICS; STORIES; NUDGE	Advances in information and communication technologies enable more decentralized and individualized mechanisms for coordination and for managing societal complexity. This has important consequences for the role of conditionality and the idea of individual responsibility in two seemingly unrelated policy areas. First, the changing information infrastructure enables an extension of conditionality i…	[Koenig, Pascal D.] Goethe Univ Frankfurt, Frankfurt, Germany	Goethe University Frankfurt	König, PD (corresponding author), Goethe Univ Frankfurt, Dept Polit Sci, Theodor W Adorno Pl 6, D-60629 Frankfurt, Germany.	p.koenig@soz.uni-frankfurt.de		Konig, Pascal/0000-0001-9466-4024					96	8	8	4	12	SAGE PUBLICATIONS INC	THOUSAND OAKS	2455 TELLER RD, THOUSAND OAKS, CA 91320 USA	2053-9517			BIG DATA SOC	Big Data Soc.	NOV 14	2017	4	2
J	Wessel, M; Levie, A; Siegel, R				Wessel, Maxwell; Levie, Aaron; Siegel, Robert			The Problem with Legacy Ecosystems	HARVARD BUSINESS REVIEW			English	Article								In the digital age, software has enabled innovators like Uber and Testa to gather crucial data about customers and create revolutionary offerings to serve them. Meanwhile, many well-resourced incumbents struggle to develop extended digital relationships with customers. That's partly because it's hard for companies to change their established business models. But the authors point out another inhi…	[Wessel, Maxwell] SAP Io, San Francisco, CA 94080 USA; [Siegel, Robert] Stanfords Grad Sch Business, Management, Stanford, CA USA		Wessel, M (corresponding author), SAP Io, San Francisco, CA 94080 USA.								0	8	8	0	69	HARVARD BUSINESS SCHOOL PUBLISHING CORPORATION	WATERTOWN	300 NORTH BEACON STREET, WATERTOWN, MA 02472 USA	0017-8012			HARVARD BUS REV	Harv. Bus. Rev.	NOV	2016	94	11
J	Ashton, H; Thorns, DC				Ashton, Hazel; Thorns, David C.			The role of information communications technology in retrieving local community	CITY & COMMUNITY			English	Article								The article explores the decline in social connectivity and the questions of whether and how local populations can use information-communications technologies (ICTs) to help reconnect. At. the center of this debate are problems in conceptulizing community in today's globalizing network society. As well as challenges to older ideas about community, these problems include the impacts of numerous co…	[Thorns, David C.] Univ Canterbury, Coll Arts, Sch Sociol & Anthropol, Christchurch 1, New Zealand	University of Canterbury	Thorns, DC (corresponding author), Univ Canterbury, Coll Arts, Sch Sociol & Anthropol, Private Bag 4800, Christchurch 1, New Zealand.	david.thorns@canterbury.ac.nz							49	8	9	2	11	WILEY	HOBOKEN	111 RIVER ST, HOBOKEN 07030-5774, NJ USA	1535-6841	1540-6040		CITY COMMUNITY	City Community	SEP	2007	6	3
J	Smith, P; Steemers, J				Smith, Paul; Steemers, Jeanette			BBC to the rescue! Digital switchover and the reinvention of public service broadcasting in Britain	JAVNOST-THE PUBLIC			English	Article								Britain is almost unique in giving its incumbent public service broadcaster, the BBC, a leading role in driving digital, thereby hoping to hasten digital take-up, and thus allowing analogue switch-off by 2012. This paper is divided into two parts. The first part investigates the recent historical past with respect to the making of policy, drawing on the analytical framework of policy cycles. Why …	De Montfort Univ, Fac Humanities, Leicester LE1 9BH, Leics, England; Univ Westminster, Sch Media Arts & Design, London W1R 8AL, England	De Montfort University; University of Westminster	Smith, P (corresponding author), De Montfort Univ, Fac Humanities, Leicester LE1 9BH, Leics, England.	pasmith@dmu.ac.uk; J.Steemers@wmin.ac.uk		Steemers, Jeanette/0000-0003-3436-741X					62	8	9	1	26	ROUTLEDGE JOURNALS, TAYLOR & FRANCIS LTD	ABINGDON	2-4 PARK SQUARE, MILTON PARK, ABINGDON OX14 4RN, OXON, ENGLAND	1318-3222	1854-8377		JAVNOST-PUBLIC	Javnost-Public	APR	2007	14	1
J	Enrique, DV; Lerman, LV; de Sousa, PR; Benitez, GB; Santos, FMBC; Frank, AG				Enrique, Daisy Valle; Lerman, Laura Visintainer; de Sousa, Paulo Renato; Benitez, Guilherme Brittes; Santos, Fernando M. Bigares Charrua; Frank, Alejandro G.			Being digital and flexible to navigate the storm: How digital transformation enhances supply chain flexibility in turbulent environments	INTERNATIONAL JOURNAL OF PRODUCTION ECONOMICS			English	Article						Digital transformation; Industry 4; 0; Business uncertainties; Smart supply chain; Supply chain flexibility	INDUSTRY 4.0 TECHNOLOGIES; MANUFACTURING FLEXIBILITY; FIRM PERFORMANCE; METHOD VARIANCE; MANAGEMENT; INTEGRATION; IMPACT; CAPABILITY; CONTEXT; FIT	The growing environmental business uncertainties have forced companies to focus on developing more flexible supply chains. Digital transformation has been considered a key means to achieving such flexibility, but the literature lacks empirical evidence about how digital technologies effectively contribute to it. Thus, this study aims to analyze how Smart Supply Chain (i.e., a supply chain enabled…	[Enrique, Daisy Valle; Lerman, Laura Visintainer; Benitez, Guilherme Brittes; Frank, Alejandro G.] Univ Fed Rio Grande do Sul, Dept Ind Engn, Org Engn Grp Nucleo Engn Org NEO, Porto Alegre, Brazil; [Enrique, Daisy Valle; Santos, Fernando M. Bigares Charrua] Univ Beira Interior, Mech Engn Dept, Covilha, Portugal; [de Sousa, Paulo Renato] Fdn Dom Cabral, Dept Management, Nova Lima, Brazil; [Benitez…	Universidade Federal do Rio Grande do Sul; Universidade da Beira Interior; Pontificia Universidade Catolica do Parana; Universidade Federal do Rio Grande do Sul	Frank, AG (corresponding author), Univ Fed Rio Grande do Sul, Escola Engn, Ctr, Ave Osvaldo Aranha 99,Sala LOPP 508,5, BR-90035190 Porto Alegre, RS, Brazil.	ag.frank@ufrgs.br	Benitez, Guilherme Brittes/T-2979-2017; Frank, Alejandro G./H-7379-2014	Benitez, Guilherme Brittes/0000-0003-1222-4557; Frank, Alejandro G./0000-0001-5041-6467	Brazilian National Council for Scientific and Technological Development (CNPq - Conselho Nacional de Desenvolvimento Cientifico e Tecnologico) [PQ 1D]; Research Council of the State of Rio Grande do Sul (FAPERGS, (Fundacao de Amparo a Pesquisa do Estado do Rio Grande do Sul)) [21/2551-0002161-6]; Funda cao de Amparo a Pesquisa do Estado do Rio Grande do Sul; Research Coordination of the Brazilian…	Brazilian National Council for Scientific and Technological Development (CNPq - Conselho Nacional de Desenvolvimento Cientifico e Tecnologico)(Conselho Nacional de Desenvolvimento Cientifico e Tecnologico (CNPQ)Fundacao de Apoio a Pesquisa do Distrito Federal (FAPDF)); Research Council of the State of Rio Grande do Sul (FAPERGS, (Fundacao de Amparo a Pesquisa do Estado do Rio Grande do Sul)); Fun…	This project received research funds from the Brazilian National Council for Scientific and Technological Development (CNPq - Conselho Nacional de Desenvolvimento Cientfico e Tecnologico) (PQ 1D) , the Research Council of the State of Rio Grande do Sul (FAPERGS, Fundacao de Amparo a Pesquisa do Estado do Rio Grande do Sul) (Process n. 21/2551-0002161-6) and the Research Coordination of the Brazil…		137	7	7	74	148	ELSEVIER	AMSTERDAM	RADARWEG 29, 1043 NX AMSTERDAM, NETHERLANDS	0925-5273	1873-7579		INT J PROD ECON	Int. J. Prod. Econ.	AUG	2022	250
J	Korucuk, S; Aytekin, A; Ecer, F; Karamasa, Ç; Zavadskas, EK				Korucuk, Selcuk; Aytekin, Ahmet; Ecer, Fatih; Karamasa, Caglar; Zavadskas, Edmundas Kazimieras			Assessing Green Approaches and Digital Marketing Strategies for Twin Transition via Fermatean Fuzzy SWARA-COPRAS	AXIOMS			English	Article						twin transition; green transition; digital transition; fermatean fuzzy sets; sustainability; information and communication technology	DECISION-MAKING; WEIGHT ASSESSMENT; MCDM MODEL; SELECTION; TRANSFORMATION; MANAGEMENT; INTERNET	Integrating green approaches and digital marketing strategies for Information and Communication Technologies (ICTs), which reduce environmental risks to desired levels by eliminating emissions and pollution, is considered one of the most promising solutions for logistics companies. The study strives to bring a practical and applicable solution to the decision problem involving the selection of in…	[Korucuk, Selcuk] Giresun Univ, Bulancak Kadir Karabas Vocat Sch, Dept Int Trade & Logist, TR-28300 Giresun, Turkey; [Aytekin, Ahmet] Artvin Coruh Univ, Hopa Fac Econ & Adm Sci, Dept Business Adm, TR-08100 Hopa, Turkey; [Ecer, Fatih] Afyon Kocatepe Univ, Fac Econ & Adm Sci, Sub Dept Operat Res, ANS Campus, TR-03200 Afyon, Turkey; [Karamasa, Caglar] Anadolu Univ, Fac Business, Dept Business Adm, T…	Giresun University; Artvin Coruh University; Afyon Kocatepe University; Anadolu University; Vilnius Gediminas Technical University	Ecer, F (corresponding author), Afyon Kocatepe Univ, Fac Econ & Adm Sci, Sub Dept Operat Res, ANS Campus, TR-03200 Afyon, Turkey.;Zavadskas, EK (corresponding author), Vilnius Gediminas Tech Univ, Inst Sustainable Construct, Sauletekio Al 11, LT-10223 Vilnius, Lithuania.	fecer@aku.edu.tr; edmundas.zavadskas@vilniustech.lt	Aytekin, Ahmet/AAG-1900-2019; Ecer, Fatih/AAE-8455-2020	Aytekin, Ahmet/0000-0002-1536-7097; Ecer, Fatih/0000-0002-6174-3241; KORUCUK, SELCUK/0000-0003-2471-1950; Karamasa, Caglar/0000-0003-2454-1824					163	7	7	18	32	MDPI	BASEL	ST ALBAN-ANLAGE 66, CH-4052 BASEL, SWITZERLAND		2075-1680		AXIOMS	Axioms	DEC	2022	11	12
J	Weerabahu, WMSK; Samaranayake, P; Nakandala, D; Hurriyet, H				Weerabahu, W. M. Samanthi Kumari; Samaranayake, Premaratne; Nakandala, Dilupa; Hurriyet, Hilal			Digital supply chain research trends: a systematic review and a maturity model for adoption	BENCHMARKING-AN INTERNATIONAL JOURNAL			English	Article; Early Access						Industry 4; 0; Digital supply chains; DSC enablers; Challenges of DSC adoption	INDUSTRY 4.0 TECHNOLOGIES; CLOUD COMPUTING ADOPTION; BIG DATA ANALYTICS; DYNAMIC CAPABILITIES; MANAGEMENT-PRACTICES; FIRM PERFORMANCE; IMPLEMENTATION; DETERMINANTS; PERSPECTIVE; READINESS	Purpose This study investigates the enablers and challenges of digital supply chains (DSCs) adoption and develops a digital supply chain maturity (DSCM) model as a basis for developing guidelines for DSC adoption in the digital transformation journey. Design/methodology/approach The research involves a systematic literature review (SLR) of Industry 4.0 (I4) adoption in supply chain (SC) practices…	[Weerabahu, W. M. Samanthi Kumari; Samaranayake, Premaratne; Nakandala, Dilupa; Hurriyet, Hilal] Western Sydney Univ, Sch Business, Penrith, NSW, Australia	Western Sydney University	Weerabahu, WMSK (corresponding author), Western Sydney Univ, Sch Business, Penrith, NSW, Australia.	S.Weerabahu@westernsydney.edu.au	Samaranayake, Premaratne/ABI-6391-2022	Samaranayake, Premaratne/0000-0002-6253-7976; Weerabahu, Samanthi/0000-0003-4925-7096; Nakandala, Dilupa/0000-0003-1535-5288					71	7	7	19	42	EMERALD GROUP PUBLISHING LTD	BINGLEY	HOWARD HOUSE, WAGON LANE, BINGLEY BD16 1WA, W YORKSHIRE, ENGLAND	1463-5771	1758-4094		BENCHMARKING	Benchmarking	2022 AUG 8	2022
J	Schallmo, D; Williams, CA; Tidd, J				Schallmo, Daniel; Williams, Christopher A.; Tidd, Joe			THE ART OF HOLISTIC DIGITALISATION: A META-VIEW ON STRATEGY, TRANSFORMATION, IMPLEMENTATION, AND MATURITY	INTERNATIONAL JOURNAL OF INNOVATION MANAGEMENT			English	Article						Digital strategy; digital transformation; digital implementation; digital maturity	MODELS; MANAGEMENT	In the new global digital economy, holistic digitalisation has become central for all non-profit and for-profit institutions. Recent developments in digital initiatives have heightened the need to investigate holistic digitalisation. This paper aims to develop a meta-view of holistic digitalisation consisting of several fundamental perspectives for strategically oriented digitalisation. These per…	[Schallmo, Daniel] Neu Ulm Univ Appl Sci, Wileystr 1, D-89231 Neu Ulm, Germany; [Williams, Christopher A.] Johannes Kepler Univ Linz, Altenberger Str 69, A-4040 Linz, Austria; [Tidd, Joe] Univ Sussex, Sussex House Falmer, Brighton BN1 9RH, E Sussex, England	Johannes Kepler University Linz; University of Sussex	Schallmo, D (corresponding author), Neu Ulm Univ Appl Sci, Wileystr 1, D-89231 Neu Ulm, Germany.	daniel.schallmo@hnu.de; chrs.a.willlams@gmail.com; j.tidd@sussex.ac.uk	Williams, Christopher/GQQ-9115-2022	Schallmo, Daniel/0000-0002-4221-001X					82	7	7	5	23	WORLD SCIENTIFIC PUBL CO PTE LTD	SINGAPORE	5 TOH TUCK LINK, SINGAPORE 596224, SINGAPORE	1363-9196	1757-5877		INT J INNOV MANAG	Int. J. Innov. Manag.	APR	2022	26	3
J	Mastromartino, B; Naraine, ML				Mastromartino, Brandon; Naraine, Michael L.			(Dis)Innovative digital strategy in professional sport: examining sponsor leveraging through social media	INTERNATIONAL JOURNAL OF SPORTS MARKETING & SPONSORSHIP			English	Article						Social media; Innovation; NHL; COVID; Disinnovation	USER ENGAGEMENT; ACTIVATION; MOTIVATIONS; CONGRUENCE; NETWORKS; BASEBALL; USAGE	Purpose The purpose of this study was to examine the effectiveness of social media strategies of sport organizations when an unexpected absence of relevant content occurs. The study explored the typologies of Instagram posts of NHL teams and measured engagement of social media content that was not planned in advance. Design/methodology/approach A mixed methods approach was utilized through a cont…	[Mastromartino, Brandon] Southern Methodist Univ, Dallas, TX 75205 USA; [Naraine, Michael L.] Brock Univ, St Catharines, ON, Canada	Southern Methodist University; Brock University	Mastromartino, B (corresponding author), Southern Methodist Univ, Dallas, TX 75205 USA.	bmastromartino@smu.edu							67	7	7	1	18	EMERALD GROUP PUBLISHING LTD	BINGLEY	HOWARD HOUSE, WAGON LANE, BINGLEY BD16 1WA, W YORKSHIRE, ENGLAND	1464-6668	2515-7841		INT J SPORT MARK SPO	Int. J. Sports Mark. Spons.	SEP 21	2022	23	5
J	López-López, D; Giusti, G				Lopez-Lopez, David; Giusti, Giovanni			Comparing Digital Strategies and Social Media Usage in B2B and B2C Industries in Spain	JOURNAL OF BUSINESS-TO-BUSINESS MARKETING			English	Article						Digital strategies; digital tactics; B2B; B2C; cluster analysis		Using 285 responses obtained in a survey of high- and middle-level managers of firms located in Spain and by implementing clustering techniques, we identify differences in the conception and adoption of a digital strategy and the use of social media. A driver for these differences is represented by whether companies are adopting a B2C or a B2B business model. Specifically, B2B companies are slowe…	[Lopez-Lopez, David] ESADE Business Sch, Mkt Dept, Barcelona, Spain; [Giusti, Giovanni] Univ Pompeu Fabra, Tecnocampus Mataro, Barcelona, Spain	Universitat Ramon Llull; Escuela Superior de Administracion y Direccion de Empresas (ESADE); Pompeu Fabra University	López-López, D (corresponding author), ESADE Business Sch, Barcelona, Spain.	david.lopez1@esade.edu	Lopez-Lopez, David/GXW-1814-2022; Lopez-Lopez, David/AAE-7283-2021; López-López, David/AAC-4086-2022	Lopez-Lopez, David/0000-0003-4459-275X; Giusti, Giovanni/0000-0001-8983-7525					33	7	7	6	33	ROUTLEDGE JOURNALS, TAYLOR & FRANCIS LTD	ABINGDON	2-4 PARK SQUARE, MILTON PARK, ABINGDON OX14 4RN, OXON, ENGLAND	1051-712X	1547-0628		J BUS-BUS MARK	J. Bus.-Bus. Mark.	APR 2	2020	27	2
J	Czauderna, A; Budke, A				Czauderna, Andre; Budke, Alexandra			How Digital Strategy and Management Games Can Facilitate the Practice of Dynamic Decision-Making	EDUCATION SCIENCES			English	Article						decision-making; polytelic conflicts; problem-solving; digital games; game-based learning; gameplay loop; game design; geography education research; qualitative research	GAMEPLAY LOOP METHODOLOGY	This paper examines how digital strategy and management games that have been initially designed for entertainment can facilitate the practice of dynamic decision-making. Based on a comparative qualitative analysis of 17 games-organized into categories derived from a conceptual model of decision-making design-this article illustrates two ways in which these games may be useful in supporting the le…	[Czauderna, Andre] TH Koln, Cologne Game Lab, Schanzenstr 28, D-51063 Cologne, Germany; [Budke, Alexandra] Univ Cologne, Inst Geog Educ, Gronewaldstr 2, D-50931 Cologne, Germany	University of Cologne	Czauderna, A (corresponding author), TH Koln, Cologne Game Lab, Schanzenstr 28, D-51063 Cologne, Germany.	andre.czauderna@th-koeln.de; alexandra.budke@uni-koeln.de		Budke, Alexandra/0000-0003-1063-8991; Czauderna, Andre/0000-0002-1091-5656	German Federal Ministry of Education and Research (BMBF) [01JD1810A]	German Federal Ministry of Education and Research (BMBF)(Federal Ministry of Education & Research (BMBF))	This research was funded by the German Federal Ministry of Education and Research (BMBF), grant number 01JD1810A.		37	7	7	1	7	MDPI	BASEL	ST ALBAN-ANLAGE 66, CH-4052 BASEL, SWITZERLAND		2227-7102		EDUC SCI	Educ. Sci.	APR	2020	10	4
J	Krona, M				Krona, Michael			Collaborative Media Practices and Interconnected Digital Strategies of Islamic State (IS) and Pro-IS Supporter Networks on Telegram	INTERNATIONAL JOURNAL OF COMMUNICATION			English	Article						social media; propaganda; Islamic State; Telegram; collaborative media; terrorism; participatory media; affordances		No previous organization has managed to execute such a widespread and sophisticated model for producing and distributing propaganda as the Islamic State (IS), relying on digital participation from supporters on a global scale. In 2015, IS and its supporters started using the encrypted application Telegram. On pro-IS channels, supporters are currently managing virtual communities in which an ideol…	[Krona, Michael] Malmo Univ, Malmo, Sweden	Malmo University	Krona, M (corresponding author), Malmo Univ, Malmo, Sweden.	michael.krona@mau.se							39	7	7	0	9	USC ANNENBERG PRESS	LOS ANGELES	UNIV SOUTHERN CALIFORNIA, KERCKHOFF HALL, 734 W ADAMS BLVD, MC7725, LOS ANGELES, CA 90089 USA	1932-8036			INT J COMMUN-US	Int. J. Commun.		2020	14
J	Richter, JG; Chehab, G; Kiltz, U; Callhoff, J; Voormann, A; Lorenz, HM; Schneider, M; Specker, C				Richter, Jutta G.; Chehab, Gamal; Kiltz, Uta; Callhoff, Johanna; Voormann, Anna; Lorenz, Hanns-Martin; Schneider, Matthias; Specker, Christof			Digital Health in the Rheumatology - Status Survey 2018/19	DEUTSCHE MEDIZINISCHE WOCHENSCHRIFT			German	Article						digital health; Rheumatologie; Versorgungsforschung; digital health; rheumatology; health services research	CARE; ARTHRITIS; LUPUS	Was ist neu? Stand der Dinge Innovationen in der Informations- und Kommunikationstechnologie haben in der Rheumatologie eine jahrzehntelange Tradition, die Deutsche Gesellschaft fur Rheumatologie hat im Jahr 2018 die Kommission Digitale Rheumatologie gegrundet. Digitale Anwendungen in der deutschen Rheumatologie Mobile Datenerfassung rheumatologischer Patienten ist valide moglich. Sie eroffnet da…	[Richter, Jutta G.; Chehab, Gamal; Schneider, Matthias] Heinrich Heine Univ Dusseldorf, Univ Klinikum Dusseldorf, Med Fak, Poliklin,Funkt Bereich, Moorenstr 5, D-40225 Dusseldorf, Germany; [Richter, Jutta G.; Chehab, Gamal; Schneider, Matthias] Heinrich Heine Univ Dusseldorf, Univ Klinikum Dusseldorf, Med Fak, Hiller Forschungszentrum Rheumatol, Moorenstr 5, D-40225 Dusseldorf, Germany; [Kiltz, U…	Heinrich Heine University Dusseldorf; Heinrich Heine University Dusseldorf Hospital; Heinrich Heine University Dusseldorf; Heinrich Heine University Dusseldorf Hospital; Rheumazentrum Ruhrgebiet; Ruhr University Bochum; Ruhr University Bochum; Deutsches Rheuma-Forschungszentrum (DRFZ); Ruprecht Karls University Heidelberg; Kliniken Essen-Mitte	Richter, JG (corresponding author), Heinrich Heine Univ Dusseldorf, Univ Klinikum Dusseldorf, Med Fak, Poliklin,Funkt Bereich, Moorenstr 5, D-40225 Dusseldorf, Germany.;Richter, JG (corresponding author), Heinrich Heine Univ Dusseldorf, Univ Klinikum Dusseldorf, Med Fak, Hiller Forschungszentrum Rheumatol, Moorenstr 5, D-40225 Dusseldorf, Germany.	richter@rheumanet.org	Chehab, Gamal/AAP-5698-2021; Specker, Christof/GNP-2957-2022; owoyele, babajide/AAD-7054-2020; Specker, Christof/ABE-6317-2021; Richter, Jutta G/AAA-5054-2021; Richter, Jutta G./AHA-3103-2022	Chehab, Gamal/0000-0001-7309-2370; owoyele, babajide/0000-0002-3688-5248; Richter, Jutta G./0000-0001-8194-3243; Callhoff, Johanna/0000-0002-3923-2728; Specker, Christof/0000-0003-2504-3229					25	7	7	0	6	GEORG THIEME VERLAG KG	STUTTGART	RUDIGERSTR 14, D-70469 STUTTGART, GERMANY	0012-0472	1439-4413		DEUT MED WOCHENSCHR	Dtsch. Med. Wochenschr.	APR	2019	144	7
J	Ribeiro, SS; Rezende, DA; Yao, JT				Ribeiro, Sergio Silva; Rezende, Denis Alcides; Yao, Jingtao			Toward a model of the municipal evidence-based decision process in the strategic digital city context	INFORMATION POLITY			English	Article						Decision process; municipal strategies; municipal public services; information technology resources; evidence-based management; strategic digital city	MANAGEMENT; CITIES; PARTICIPATION; INFORMATION; SCIENCE; SYSTEMS	Technological and connected modern cities demand effective decisions by managers that are aligned with citizens demands. The strategic digital city that comprises strategies, information, services, and information technology resources can provide the necessary context so that decisions based on evidence are made possible at the municipal level of management. The objective of this study is to prop…	[Ribeiro, Sergio Silva; Yao, Jingtao] Univ Regina, Dept Comp Sci, Regina, SK, Canada; [Rezende, Denis Alcides] Pontificia Univ Catolica Parana, Urban Management Postgrad Program, Curitiba, Parana, Brazil	University of Regina; Pontificia Universidade Catolica do Parana	Ribeiro, SS (corresponding author), Univ Regina, Dept Comp Sci, Regina, SK, Canada.	professor@sergioribeiro.com.br	Yao, JingTao/A-8483-2008; Rezende, Denis Alcides/AAR-2488-2021	Yao, JingTao/0000-0002-7823-4136; Rezende, Denis Alcides/0000-0002-3327-0424					150	7	8	2	11	IOS PRESS	AMSTERDAM	NIEUWE HEMWEG 6B, 1013 BG AMSTERDAM, NETHERLANDS	1570-1255	1875-8754		INFORM POLITY	Inf. Polity		2019	24	3
J	Arostegi, M; Torre-Bastida, A; Bilbao, MN; Del Ser, J				Arostegi, Maria; Torre-Bastida, Ana; Nekane Bilbao, Miren; Del Ser, Javier			A heuristic approach to the multicriteria design of IaaS cloud infrastructures for Big Data applications	EXPERT SYSTEMS			English	Article						Big Data; Cloud Computing; IaaS; multiobjective heuristics; NSGA-II	NSGA-II; PERFORMANCE; ALGORITHM; SELECTION; FUTURE; SYSTEM	The rapid growth of new computing paradigms such as Cloud Computing and Big Data has unleashed great opportunities for companies to shift their business model towards a fully digital strategy. A major obstacle in this matter is the requirement of highly specialized ICT infrastructures that are expensive and difficult to manage. It is at this point that the IaaS (infrastructure as a service) model…	[Arostegi, Maria; Torre-Bastida, Ana; Del Ser, Javier] TECNALIA, OPTIMA Dept, Derio, Spain; [Nekane Bilbao, Miren; Del Ser, Javier] Univ Basque Country, UPV EHU, Dept Commun Engn, Bilbao, Spain; [Del Ser, Javier] BCAM, Data Sci Grp, Bilbao, Spain	University of Basque Country	Del Ser, J (corresponding author), TECNALIA, Derio 48160, Bizkaia, Spain.	javier.delser@tecnalia.com	Del Ser, Javier/AAA-2965-2021	Del Ser, Javier/0000-0002-1260-9775; BILBAO MARON, MIREN NEKANE/0000-0002-0519-8728; Arostegi, Maria/0000-0001-6691-4276; Torre-Bastida, Phd. Ana I./0000-0003-3005-1100	Basque Government under the ELKARTEK program (BID3ABI project)	Basque Government under the ELKARTEK program (BID3ABI project)	This work has been funded in part by the Basque Government under the ELKARTEK program (BID3ABI project).		55	7	7	0	20	WILEY	HOBOKEN	111 RIVER ST, HOBOKEN 07030-5774, NJ USA	0266-4720	1468-0394		EXPERT SYST	Expert Syst.	OCT	2018	35	5
J	Meinich-Bache, O; Engan, K; Birkenes, TS; Myklebust, H				Meinich-Bache, Oyvind; Engan, Kjersti; Birkenes, Tonje Soraas; Myklebust, Helge			Real-Time Chest Compression Quality Measurements by Smartphone Camera	JOURNAL OF HEALTHCARE ENGINEERING			English	Article							RESUSCITATION COUNCIL GUIDELINES; HOSPITAL CARDIAC-ARREST; BASIC LIFE-SUPPORT; CARDIOPULMONARY-RESUSCITATION; FEEDBACK DEVICE; CPR; ASSOCIATION; PERFORMANCE; STATEMENT; OUTCOMES	Out-of-hospital cardiac arrest (OHCA) is recognized as a global mortality challenge, and digital strategies could contribute to increase the chance of survival. In this paper, we investigate if cardiopulmonary resuscitation (CPR) quality measurement using smartphone video analysis in real-time is feasible for a range of conditions. With the use of a web-connected smartphone application which util…	[Meinich-Bache, Oyvind; Engan, Kjersti] Univ Stavanger, Kjell Arholmsgate 41, N-4036 Stavanger, Norway; [Birkenes, Tonje Soraas; Myklebust, Helge] Laerdal Med, Tanke Svilands Gate 30, N-4002 Stavanger, Norway	Universitetet i Stavanger	Meinich-Bache, O (corresponding author), Univ Stavanger, Kjell Arholmsgate 41, N-4036 Stavanger, Norway.	oyvind.meinich-bache@uis.no	Engan, Kjersti/AFU-6843-2022	Engan, Kjersti/0000-0002-8970-0067; Birkenes, Tonje Soraas/0000-0001-8736-5122; Meinich-Bache, Oyvind/0000-0002-9264-027X	University of Stavanger; Laerdal Medical	University of Stavanger; Laerdal Medical	We want to thank Solveig Haukas Haaland, (Laerdal Medical) for help with planning and execution of experiments and (omas Hinna (BI Builders) and Daniel Vartdal (Webstep Stavanger) for help with real-time implementation of the algorithm in an android app. The study and application development was funded by University of Stavanger and Laerdal Medical.		37	7	8	1	1	HINDAWI LTD	LONDON	ADAM HOUSE, 3RD FLR, 1 FITZROY SQ, LONDON, W1T 5HF, ENGLAND	2040-2295	2040-2309		J HEALTHC ENG	J. Healthc. Eng.		2018	2018
J	Grau, BE				Enguix Grau, Begonya			Activism and Digital Practices in the Construction of an LGTB Sphere in Spain	DADOS-REVISTA DE CIENCIAS SOCIAIS			Spanish	Article						digital practices; social networks; LGTB activism; mobilization; communities	WOMEN	Based on the anthropological interrogation into communities and the construction of a public sphere, this article approaches the digital strategies used to shape what may be referred to as the Spanish LGTB sphere. I consider LGTB activism as the main producer of legitimized social discourse, and have therefore analyzed the websites of seven LGTB collectives and other digital resources in order to…	[Enguix Grau, Begonya] Univ Oberta Catalunya, Barcelona, Spain	UOC Universitat Oberta de Catalunya	Grau, BE (corresponding author), Univ Oberta Catalunya, Barcelona, Spain.	benguix@uoc.edu		Enguix, Begonya/0000-0002-5020-9019					62	7	10	1	14	INST UNIV PESQUISAS RIO DE JANEIRO-IUPERJ	RIO DE JANEIRO	RUA DA MATRIZ 82, BOTAFOGO, RIO DE JANEIRO, 22260.100, BRAZIL	0011-5258	1678-4588		DADOS-REV CIENC SOC	Dados-Rev. Cienc. Sociais	JUL-SEP	2016	59	3
J	Colbjornsen, T				Colbjornsen, Terje			Digital divergence: analysing strategy, interpretation and controversy in the case of the introduction of an ebook reader technology	INFORMATION COMMUNICATION & SOCIETY			English	Article						digital publishing; mobile technology; innovation; technology strategy; e-commerce	ACTOR-NETWORKS; COMMUNICATION	What happens when a media innovation encounters the marketplace in the form of critical bloggers and commentators? This paper adapts conceptual frameworks from science and technology studies - particularly actor-network theory (ANT) and social construction of technology (SCOT) - in order to analyse the process of introducing new media devices and the role of users and mediators in this process, b…	Univ Oslo, Dept Media & Commun, N-0317 Oslo, Norway	University of Oslo	Colbjornsen, T (corresponding author), Univ Oslo, Dept Media & Commun, POB 1093, N-0317 Oslo, Norway.	terjeco@media.uio.no		Colbjornsen, Terje/0000-0001-5849-2851					38	7	7	0	115	ROUTLEDGE JOURNALS, TAYLOR & FRANCIS LTD	ABINGDON	2-4 PARK SQUARE, MILTON PARK, ABINGDON OX14 4RN, OXON, ENGLAND	1369-118X	1468-4462		INFORM COMMUN SOC	Info. Commun. Soc.	JAN 2	2015	18	1
J	Coyne, B; Devitt, N; Lyons, S; Mccoy, S				Coyne, Bryan; Devitt, Niamh; Lyons, Sean; McCoy, Selina			Perceived benefits and barriers to the use of high-speed broadband in Ireland's second-level schools	IRISH EDUCATIONAL STUDIES			English	Article						high-speed broadband; ICT barriers; second-level education; student learning; ICT integration	ICT; TECHNOLOGY; EDUCATION; INTEGRATION; IMPACT	As part of Ireland's National Digital Strategy, high-speed broadband is being rolled out to all second-level schools to support greater use of information and communication technology (ICT) in education. This programme signals a move from slow and unreliable broadband connections for many schools to a guaranteed high-speed connection with technical support. Theoretically, this should allow for be…	[Coyne, Bryan; Devitt, Niamh] Econ & Social Res Inst, Econ Anal Div, Dublin, Ireland; [Lyons, Sean; McCoy, Selina] Econ & Social Res Inst, Dublin, Ireland; [Lyons, Sean; McCoy, Selina] Trinity Coll Dublin, Dublin, Ireland	Economic & Social Research Institute (ESRI); Economic & Social Research Institute (ESRI); Trinity College Dublin	Mccoy, S (corresponding author), Econ & Social Res Inst, Dublin, Ireland.;Mccoy, S (corresponding author), Trinity Coll Dublin, Dublin, Ireland.	selina.mccoy@esri.ie	McCoy, Selina/ABC-9817-2020; Lyons, Sean/AAH-7579-2019	McCoy, Selina/0000-0001-8774-4018; Lyons, Sean/0000-0002-3526-6947	ESRI Programme of Research in Communications; Ireland's Department for Communications, Energy and Natural Resources; Commission for Communications Regulation	ESRI Programme of Research in Communications; Ireland's Department for Communications, Energy and Natural Resources; Commission for Communications Regulation	This research was funded by the ESRI Programme of Research in Communications, with contributions from Ireland's Department for Communications, Energy and Natural Resources and the Commission for Communications Regulation. The usual disclaimer applies.		29	7	7	1	6	ROUTLEDGE JOURNALS, TAYLOR & FRANCIS LTD	ABINGDON	2-4 PARK SQUARE, MILTON PARK, ABINGDON OX14 4RN, OXON, ENGLAND	0332-3315	1747-4965		IRISH EDUC STUD	Ir. Educ. Stud.		2015	34	4
J	Prado, E				Prado, Emili			The press in Catalonia: between the digital challenge and nation building	MEDIA CULTURE & SOCIETY			English	Article						Catalonia; cultural identity; media; nation building; online strategies; press		This article discusses the challenges facing the Catalan press in a context marked by the digitization and by a political process that demands independence. The media landscape in Catalonia is populated by media produced at Spanish level and at Catalan level, and this applies to the press, radio and television. Mainstream paid-for newspapers, available to the citizens of Catalonia produced at a n…	[Prado, Emili] Univ Autonoma Barcelona, E-08193 Barcelona, Spain	Autonomous University of Barcelona	Prado, E (corresponding author), Univ Autonoma Barcelona, Dept Comunicacio Audiovisual & Publicitat, E-08193 Barcelona, Spain.	Emili.Prado@uab.cat		Prado, Emili/0000-0003-4871-2472					13	7	7	0	19	SAGE PUBLICATIONS LTD	LONDON	1 OLIVERS YARD, 55 CITY ROAD, LONDON EC1Y 1SP, ENGLAND	0163-4437	1460-3675		MEDIA CULT SOC	Media Cult. Soc.	JAN	2015	37	1
J	de la Selva, ARA				Rosa Alva de la Selva, Alma			The New Faces of Inequality in the 21st Century: The Digital Gap	REVISTA MEXICANA DE CIENCIAS POLITICAS Y SOCIALES			Spanish	Article						social inequality; Information and Knowledge Society, digital gap; digital agenda; National Digital Strategy; Mexico		In the context of Information and Knowledge Society (iks) and global capitalism's world crisis, this work addresses the problems of the digital gap as an expression of inequalities in the 21st century. The precedents of the boom that this process began to gain in the last years of the 20th century are presented, as well as the proposals and projects developed by Latin American countries in order …	[Rosa Alva de la Selva, Alma] UNAM, Fac Ciencias Polit & Sociales, Ctr Estudios Ciencias Comunicac, Mexicali, Baja California, Mexico; [Rosa Alva de la Selva, Alma] Asociac Mexicana Invest Comunicac, Mexicali, Baja California, Mexico	Universidad Nacional Autonoma de Mexico	de la Selva, ARA (corresponding author), UNAM, Fac Ciencias Polit & Sociales, Ctr Estudios Ciencias Comunicac, Mexicali, Baja California, Mexico.	alvadelaselva@hotmail.com							25	7	7	0	22	UNAM, FAC CIENCIAS POLITICAS & SOCIALES	MEXICO CITY DF	CIUDAD UNIV, DIV ESTUDIOS POSGRADO, CIRCUITO MARIO DE LA CUEVA, MEXICO CITY DF, CP 04510, MEXICO	0185-1918			REV MEX CIENC POLIT	Rev. Mex. Cienc. Polit. Soc.	JAN-APR	2015	60	223
J	Slaatta, T				Slaatta, Tore			Print versus digital in Norwegian newspapers	MEDIA CULTURE & SOCIETY			English	Article						digital news distribution; media change; media systems; newspapers; Norway; online news; print versus digital media		The conversion of newspapers from print to digital is not taking place in a simple and direct way. In Norway at least, digital news distribution is still developing on the basis of the print media order. But at the same time, it is increasingly becoming a diversified and strategically nuanced logic of online news distribution. What is remarkable in the Norwegian situation is the stability in the …	[Slaatta, Tore] Univ Oslo, N-0317 Oslo, Norway	University of Oslo	Slaatta, T (corresponding author), Univ Oslo, Dept Media & Commun, POB 1093, N-0317 Oslo, Norway.	tore.slaatta@media.uio.no							9	7	7	2	25	SAGE PUBLICATIONS LTD	LONDON	1 OLIVERS YARD, 55 CITY ROAD, LONDON EC1Y 1SP, ENGLAND	0163-4437	1460-3675		MEDIA CULT SOC	Media Cult. Soc.	JAN	2015	37	1
S	Dalton, B; Jocius, R		Ortlieb, E; Cheek, EH		Dalton, Bridget; Jocius, Robin			FROM STRUGGLING READER TO DIGITAL READER AND MULTIMODAL COMPOSER	SCHOOL-BASED INTERVENTIONS FOR STRUGGLING READERS, K-8	Literacy Research Practice and Evaluation		English	Article; Book Chapter						Digital literacies; struggling readers; comprehension; multimodal composition; universal design for learning	TECHNOLOGY; VOCABULARY; LITERACY; STUDENTS; ENVIRONMENT; STRATEGIES; ENGLISH	Purpose - To introduce classroom teachers to an integrated digital literacies perspective and provide a range of strategies and tools to support struggling readers in becoming successful digital readers and multimodal composers. Design/methodology/approach - The chapter begins with the rationale for integrating technology to support struggling readers' achievement, explains universal design for l…	[Dalton, Bridget] Univ Colorado Boulder, Sch Educ, Literacy Studies, Boulder, CO 80309 USA; [Jocius, Robin] Vanderbilt Univ, Peabody Coll Educ, Dept Teaching & Learning, Nashville, TN 37235 USA	University of Colorado System; University of Colorado Boulder; Vanderbilt University; Vanderbilt University Peabody College	Dalton, B (corresponding author), Univ Colorado Boulder, Sch Educ, Literacy Studies, Boulder, CO 80309 USA.								47	7	8	2	5	EMERALD GROUP PUBLISHING LTD	BINGLEY	HOWARD HOUSE, WAGON LANE, BINGLEY, W YORKSHIRE BD16 1WA, ENGLAND	2048-0458		978-1-78190-697-2; 978-1-78190-696-5	LIT RES PRACT EVAL			2013	3
J	Shojaei, RS; Burgess, G				Shojaei, Reyhaneh S.; Burgess, Gemma			Non-technical inhibitors: Exploring the adoption of digital innovation in the UK construction industry	TECHNOLOGICAL FORECASTING AND SOCIAL CHANGE			English	Article						Digital innovation; Building Information Modelling (BIM); Construction industry; Digital Innovation Implementation Inhibitors; Socio-technical theory; Non -technical barriers	CRITICAL SUCCESS FACTORS; SOCIOTECHNICAL SYSTEMS; SECTORAL SYSTEMS; INFORMATION; BIM; IMPLEMENTATION; DYNAMICS; PROJECTS; TECHNOLOGIES; FRAMEWORK	Digital technologies, in particular, Building Information Modelling (BIM), are claimed to provide an effective and efficient solution for tackling the plethora of problems in the UK construction industry, including time and cost overruns, low quality, and inefficient use of resources. Despite the potential benefits and government promotion, the adoption of digital innovation in the construction s…	[Shojaei, Reyhaneh S.; Burgess, Gemma] Univ Cambridge, Cambridge Ctr Housing & Planning Res, Dept Land Econ, 19 Silver St, Cambridge CB3 9EP, England; [Shojaei, Reyhaneh S.] Univ Cambridge, Ctr Digital Built Britain, 21 JJ Thomson Ave, Cambridge CB3 0FA, England	University of Cambridge; University of Cambridge	Shojaei, RS (corresponding author), Univ Cambridge, Cambridge Ctr Housing & Planning Res, Dept Land Econ, 19 Silver St, Cambridge CB3 9EP, England.;Shojaei, RS (corresponding author), Univ Cambridge, Ctr Digital Built Britain, 21 JJ Thomson Ave, Cambridge CB3 0FA, England.	rss64@cam.ac.uk; glb36@cam.ac.uk		Shojaei, Reyhaneh/0000-0003-1897-8245	UK Research and Innovation through the Industrial Strategy Fund	UK Research and Innovation through the Industrial Strategy Fund	This research forms part of the Centre for Digital Built Britain's (CDBB) work at the University of Cambridge within the Construction Innovation Hub. The Construction Innovation Hub is funded by UK Research and Innovation through the Industrial Strategy Fund.		93	6	6	23	84	ELSEVIER SCIENCE INC	NEW YORK	STE 800, 230 PARK AVE, NEW YORK, NY 10169 USA	0040-1625	1873-5509		TECHNOL FORECAST SOC	Technol. Forecast. Soc. Chang.	DEC	2022	185
J	Gartner, J; Maresch, D; Tierney, R				Gartner, Johannes; Maresch, Daniela; Tierney, Robert			The key to scaling in the digital era: Simultaneous automation, individualization and interdisciplinarity	JOURNAL OF SMALL BUSINESS MANAGEMENT			English	Article; Early Access						Scaling; digital technologies; hybrid strategies; cost-leadership; differentiation; small businesses; explanatory case study	SUPERIOR FINANCIAL PERFORMANCE; COMPETITIVE STRATEGY; INFORMATION-TECHNOLOGY; KNOWLEDGE; INNOVATION; DIFFERENTIATION; DESIGN; USER; ENTREPRENEURSHIP; IMPLEMENTATION	In this paper, we develop a theoretical framework that explains how digital technologies can help small businesses generate competitive advantages for scaling. To gain and sustain competitive advantages, small businesses traditionally had to choose between cost leadership and differentiation strategies. Digital technologies enable small businesses to reduce their costs and at the same time enhanc…	[Gartner, Johannes] Lund Univ, Sch Econ & Management, Box 7080, SE-22007 Lund, Sweden; [Maresch, Daniela] Grenoble Ecole Management, Dept Management Technol & Strategy, Grenoble, France; [Maresch, Daniela] Univ Southern Denmark, Dept Entrepreneurship & Relationship Management, Odense, Denmark; [Tierney, Robert] Northern New Mexico Coll, Espanola, NM USA	Lund University; Grenoble Ecole Management; University of Southern Denmark	Gartner, J (corresponding author), Lund Univ, Sch Econ & Management, Box 7080, SE-22007 Lund, Sweden.	johannes.gartner@fek.lu.se		Maresch, Daniela/0000-0002-1443-2520					100	6	6	12	49	TAYLOR & FRANCIS INC	PHILADELPHIA	530 WALNUT STREET, STE 850, PHILADELPHIA, PA 19106 USA	0047-2778	1540-627X		J SMALL BUS MANAGE	J. Small Bus. Manag.	2022 MAY 28	2022
J	Nematollahi, S; Minter, DJ; Barlow, B; Nolan, NS; Spicer, JO; Wooten, D; Cortes-Penfield, N; Barlow, A; Chavez, MA; McCarty, T; Abdoler, E; Escota, GV				Nematollahi, Saman; Minter, Daniel J.; Barlow, Brooke; Nolan, Nathanial S.; Spicer, Jennifer O.; Wooten, Darcy; Cortes-Penfield, Nicolas; Barlow, Ashley; Chavez, Miguel A.; McCarty, Todd; Abdoler, Emily; Escota, Gerome, V			The Digital Classroom: How to Leverage Social Media for Infectious Diseases Education	CLINICAL INFECTIOUS DISEASES			English	Article						social media; medical education; digital strategy; infectious diseases; virtual learning	12 TIPS; TWEETORIALS; SCHOLARSHIP; GUIDELINES; PHYSICIAN; TWITTER; VIDEOS	Social media (SoMe) platforms have been increasingly used by infectious diseases (ID) learners and educators in recent years. This trend has only accelerated with the changes brought to our educational spaces by the coronavirus disease 2019 pandemic. Given the increasingly diverse SoMe landscape, educators may find themselves struggling with how to effectively use these tools. In this Viewpoint w…	[Nematollahi, Saman] Univ Arizona, Dept Med, Coll Med, Tucson, AZ USA; [Minter, Daniel J.] Univ Calif San Francisco, Dept Med, San Francisco, CA 94143 USA; [Barlow, Brooke] Univ Florida, Dept Pharm, Shands Hosp, Gainesville, FL USA; [Nolan, Nathanial S.; Chavez, Miguel A.; Escota, Gerome, V] Washington Univ, Dept Med, St Louis, MO USA; [Spicer, Jennifer O.] Emory Univ, Sch Med, Dept Med, Atlanta,…	University of Arizona; University of California System; University of California San Francisco; State University System of Florida; University of Florida; Washington University (WUSTL); Emory University; University of California System; University of California San Diego; University of Nebraska System; University of Nebraska Medical Center; University of Texas System; UTMD Anderson Cancer Center;…	Nematollahi, S (corresponding author), 1501 N Campbell Ave,POB 245039, Tucson, AZ 85724 USA.	snematol@email.arizona.edu	Chávez, Miguel/HZJ-1612-2023; Barlow, Brooke/GZM-7960-2022	Chávez, Miguel/0000-0001-7849-343X; Abdoler, Emily/0000-0002-0938-0527; Spicer, Jennifer/0000-0002-5565-9617	Infectious Diseases Society of America	Infectious Diseases Society of America	This supplement is supported by the Infectious Diseases Society of America.		40	6	6	1	5	OXFORD UNIV PRESS INC	CARY	JOURNALS DEPT, 2001 EVANS RD, CARY, NC 27513 USA	1058-4838	1537-6591		CLIN INFECT DIS	Clin. Infect. Dis.	MAY 15	2022	74	SUPPL 3
J	Huda, M				Huda, Miftachul			Digital marketplace for tourism resilience in the pandemic age: voices from budget hotel customers	INTERNATIONAL JOURNAL OF ORGANIZATIONAL ANALYSIS			English	Article						Organisation strategy; Tourism resilience sustainability; Pandemic age; Beliefs; Practices and experiences; Malaysian budget hotel	SERVICE; INSIGHTS	Purpose This paper aims to examine the initiative of low-price hotels, budget hotels, in Malaysia, to restore the financial sustainability through empowering the digital marketplace strategy in the tourism resilience sector. Giving an open accessibility to customers for achieving their venue with a low price and have a friendly service comes from initiating the digital marketplace arrangement. De…	[Huda, Miftachul] Univ Pendidikan Sultan Idris, Fac Human Sci, Tanjung Malim, Malaysia	Universiti Pendidikan Sultan Idris	Huda, M (corresponding author), Univ Pendidikan Sultan Idris, Fac Human Sci, Tanjung Malim, Malaysia.	halimelhuda@gmail.com	Huda, Miftachul/K-8125-2015	Huda, Miftachul/0000-0001-6712-0056					58	6	6	5	15	EMERALD GROUP PUBLISHING LTD	BINGLEY	HOWARD HOUSE, WAGON LANE, BINGLEY BD16 1WA, W YORKSHIRE, ENGLAND	1934-8835	1758-8561		INT J ORGAN ANAL	Int. J. Organ. Anal.	JAN 13	2023	31	1
J	Kim, K; Kim, B				Kim, Kyungtae; Kim, Boyoung			Decision-Making Model for Reinforcing Digital Transformation Strategies Based on Artificial Intelligence Technology	INFORMATION			English	Article						digital transformation; AI technology; digital strategy; decision model; SERM model	DYNAMIC CAPABILITIES; INTEGRATION; INNOVATION	Firms' digital environment changes and industrial competitions have evolved quickly since the Fourth Industrial Revolution and the COVID-19 pandemic. Many companies are propelling company-wide digital transformation strategies based on artificial intelligence (AI) technology for the digital innovation of organizations and businesses. This study aims to define the factors affecting digital transfo…	[Kim, Kyungtae; Kim, Boyoung] Seoul Sch Integrated Sci & Technol aSSIST, Seoul Business Sch, Seoul 03767, South Korea		Kim, B (corresponding author), Seoul Sch Integrated Sci & Technol aSSIST, Seoul Business Sch, Seoul 03767, South Korea.	ktkim@stud.assistac.kr; bykim2@assist.ac.kr							65	6	6	12	42	MDPI	BASEL	ST ALBAN-ANLAGE 66, CH-4052 BASEL, SWITZERLAND		2078-2489		INFORMATION	Information	MAY	2022	13	5
J	Marty, PF; Buchanan, V				Marty, Paul F.; Buchanan, Vivian			Exploring the Contributions and Challenges of Museum Technology Professionals during the COVID-19 Crisis	CURATOR-THE MUSEUM JOURNAL			English	Article								This paper presents results from an online survey designed to explore the role of museum technology professionals during times of crisis such as the COVID-19 pandemic. The survey results offer an important first look at the contributions and challenges of museum technology professionals during a critical turning point in the history of museums. The analysis of these results provides insight into …	[Buchanan, Vivian] Florida State Univ, Sch Informat, Tallahassee, FL 32306 USA; [Marty, Paul F.] Florida State Univ, Sch Informat, Coll Commun & Informat, Tallahassee, FL 32306 USA	State University System of Florida; Florida State University; State University System of Florida; Florida State University	Marty, PF (corresponding author), Florida State Univ, Sch Informat, Tallahassee, FL 32306 USA.	marty@fsu.edu		Marty, Paul/0000-0002-5948-5730					30	6	6	2	11	WILEY	HOBOKEN	111 RIVER ST, HOBOKEN 07030-5774, NJ USA	0011-3069	2151-6952		CURATOR	Curator	JAN	2022	65	1
J	Tantscher, D; Mayer, B				Tantscher, Dominik; Mayer, Barbara			Digital Retrofitting of legacy machines: A holistic procedure model for industrial companies	CIRP JOURNAL OF MANUFACTURING SCIENCE AND TECHNOLOGY			English	Article						Digital Transformation; Digital Retrofitting; Industry 4.0; Procedure model	VERIFICATION; VALIDATION; MANAGEMENT; INTERNET	Digital Transformation is a demanding evolutional process for industrial companies that touches all important business areas. A central role for the development towards a more flexible and efficient manufacture play production data. However, most machines in use lack a digital interface, such that they are not capable to connect in a network. Thus, data cannot be utilized. One solution from the t…	[Tantscher, Dominik; Mayer, Barbara] FH JOANNEUM, Inst Ind Management, A-8605 Kapfenberg, Austria		Tantscher, D (corresponding author), FH JOANNEUM, Inst Ind Management, A-8605 Kapfenberg, Austria.	dominik.tantscher@fh-joanneum.at; barbara.mayer@fh-joanneum.at							45	6	6	4	19	ELSEVIER	AMSTERDAM	RADARWEG 29, 1043 NX AMSTERDAM, NETHERLANDS	1755-5817	1878-0016		CIRP J MANUF SCI TEC	CIRP J. Manuf. Sci. Technol.	JAN	2022	36
J	He, ZX; Lu, WQ; Hua, GH; Wang, JM				He, Zhengxia; Lu, Wenqi; Hua, Guihong; Wang, Jianming			Factors Affecting Enterprise Level Green Innovation Efficiency in the Digital Economy Era - Evidence from Listed Paper Enterprises in China	BIORESOURCES			English	Article						Green technology innovation; Media attention; Tobit model; Environmental regulation; Digital economy	SCALE	The Guidelines on Building a Market-Oriented Green Technology Innovation System, which was released by China in 2019, has become a powerful signal to guide the development of green technology innovation (GTI). In the current digital strategy of China, the public media has become a key factor for promoting the transparency of enterprise environmental information. This paper measures the GTI effici…	[He, Zhengxia; Lu, Wenqi; Hua, Guihong; Wang, Jianming] Jiangsu Normal Univ, Xuzhou, Jiangsu, Peoples R China	Jiangsu Normal University	Hua, GH; Wang, JM (corresponding author), Jiangsu Normal Univ, Xuzhou, Jiangsu, Peoples R China.	1035329325@qq.com; huaguihong@jsnu.edu.cn; sjwjm@zufe.edu.cn			National Social Science Fund of China [19BJL033]	National Social Science Fund of China	The authors gratefully acknowledge the financial support of The National Social Science Fund of China(19BJL033).		72	6	6	14	150	NORTH CAROLINA STATE UNIV DEPT WOOD & PAPER SCI	RALEIGH	CAMPUS BOX 8005, RALEIGH, NC 27695-8005 USA	1930-2126			BIORESOURCES	BioResources	NOV	2021	16	4
J	Kondratieva, NB				Kondratieva, N. B.			EU Agricultural Digitalization Decalogue	HERALD OF THE RUSSIAN ACADEMY OF SCIENCES			English	Article						digital strategy; common agricultural policy; supranational regulation; COVID-19 pandemic; sustainable development; global climate change		The aim of the article is to summarize the ideological foundations and to characterize the current stage of agricultural digitalization in the EU. The author identifies the framework documents and areas of discussion on the development of the digital strategy of the European Union in the agricultural sector. Taking into account the successful practice and opinions of the competent centers, an ide…	[Kondratieva, N. B.] Russian Acad Sci, Inst Europe, Moscow 125009, Russia	Institute of Europe RAS; Russian Academy of Sciences	Kondratieva, NB (corresponding author), Russian Acad Sci, Inst Europe, Moscow 125009, Russia.	nkondratieva@inbox.ru							27	6	6	2	8	MAIK NAUKA/INTERPERIODICA/SPRINGER	NEW YORK	233 SPRING ST, NEW YORK, NY 10013-1578 USA	1019-3316	1555-6492		HER RUSS ACAD SCI+	Her. Russ. Acad. Sci.	NOV	2021	91	6
J	Habelsberger, BEM; Bhansing, PV				Habelsberger, Beatrix E. M.; Bhansing, Pawan, V			Art Galleries in Transformation: Is COVID-19 Driving Digitisation?	ARTS			English	Article						art galleries; art market; digital technology; multi-channel strategy; business model innovation	SPECIAL-ISSUE	Compared to other consumer goods markets, art galleries have long been reluctant to innovate through digitisation. However, the global outbreak of COVID-19 forces art galleries to reconsider the role of digital channels. This study aims to provide a better understanding of the art gallery business model and its related difficulties of integrating digital channels into marketing, communication, an…	[Habelsberger, Beatrix E. M.; Bhansing, Pawan, V] Erasmus Univ, Erasmus Sch Hist Culture & Commun, Dept Media & Commun, NL-3000 DR Rotterdam, Netherlands	Erasmus University Rotterdam; Erasmus University Rotterdam - Excl Erasmus MC	Bhansing, PV (corresponding author), Erasmus Univ, Erasmus Sch Hist Culture & Commun, Dept Media & Commun, NL-3000 DR Rotterdam, Netherlands.	habelsberger@outlook.com; bhansing@eshcc.eur.nl							58	6	6	3	31	MDPI	BASEL	ST ALBAN-ANLAGE 66, CH-4052 BASEL, SWITZERLAND		2076-0752		ARTS	Arts	SEP	2021	10	3
J	Matricano, D; Castaldi, L; Sorrentino, M; Candelo, E				Matricano, Diego; Castaldi, Laura; Sorrentino, Mario; Candelo, Elena			The behavior of managers handling digital business transformations: theoretical issues and preliminary evidence from firms in the manufacturing industry	INTERNATIONAL JOURNAL OF ENTREPRENEURIAL BEHAVIOR & RESEARCH			English	Article						Digital business transformation; Organizational culture; Leadership; Manufacturing industry; Content analysis; Case studies	RESOURCE-BASED THEORY; COMPETING VALUES; DYNAMIC THEORY; KNOWLEDGE; LEADERSHIP; INNOVATION; STRATEGY; CULTURE; ORGANIZATION; TECHNOLOGY	Purpose Organizational culture plays a central role when dealing with the issue of digital business transformation (DBT). Managers handling a DBT and involved in digital strateging are expected to modify the organizational culture of firms to make it more fitting with the paradigm of digital economy and having more chance of success. Thus, it is noteworthy to inspect the role they can have over D…	[Matricano, Diego; Castaldi, Laura; Sorrentino, Mario] Univ Campania Luigi Vanvitelli, Dept Management, Caserta, Italy; [Candelo, Elena] Univ Torino, Dept Management, Turin, Italy	Universita della Campania Vanvitelli; University of Turin	Matricano, D (corresponding author), Univ Campania Luigi Vanvitelli, Dept Management, Caserta, Italy.	diego.matricano@unicampania.it							97	6	6	4	65	EMERALD GROUP PUBLISHING LTD	BINGLEY	HOWARD HOUSE, WAGON LANE, BINGLEY BD16 1WA, W YORKSHIRE, ENGLAND	1355-2554	1758-6534		INT J ENTREP BEHAV R	Int. J. Entrep. Behav. Res.	JUL 8	2022	28	5
J	Nas, A				Nas, Alparslan			Women in Mosques: mapping the gendered religious space through online activism	FEMINIST MEDIA STUDIES			English	Article						Gender; feminism; Islam; space; Turkey; online activism		Initiated in October 2017 by a group of Muslim women in Turkey, the activism of Women in Mosques aims to increase public awareness regarding the gendered organization of the religious space. Turkey's patriarchal religious and cultural dynamics exhibit a gender-segregated organization of the mosque area, which treats men as the primary religious audience while isolating women in limited spaces. Us…	[Nas, Alparslan] Marmara Univ, Fac Commun, Goztepe Campus, TR-34722 Istanbul, Turkey	Marmara University	Nas, A (corresponding author), Marmara Univ, Fac Commun, Goztepe Campus, TR-34722 Istanbul, Turkey.	alparslan.nas@marmara.edu.tr	Nas, Alparslan/H-1102-2018	Nas, Alparslan/0000-0002-1759-4357					29	6	6	0	13	ROUTLEDGE JOURNALS, TAYLOR & FRANCIS LTD	ABINGDON	2-4 PARK SQUARE, MILTON PARK, ABINGDON OX14 4RN, OXON, ENGLAND	1468-0777	1471-5902		FEM MEDIA STUD	Fem. Media Stud.	JUL 4	2022	22	5
J	Chib, A; Nguyen, H; Lin, DY				Chib, Arul; Nguyen, Hoan; Lin, Daoyi			Provocation as Agentic Practice: Gender Performativity in Online Strategies of Transgender Sex Workers	JOURNAL OF COMPUTER-MEDIATED COMMUNICATION			English	Article						Agency; Identity; Internet; Intersectionality; Marginalization; Performativity	SOCIAL MEDIA; YOUNG-PEOPLE; IDENTITIES; DISCONNECTION; EXPERIENCES; CONNECTION; INTERNET; YOUTH	Fluid performances of gender online by gender-diverse individuals facing discrimination and fetishization raises questions about whether these acts are a source of empowerment or reinforce prevailing prejudice. We combine virtual ethnography and interviews with transwomen sex workers in Singapore (n=14) to explore the dynamic between sociostructural oppression and agentic resistance. First, heter…	[Chib, Arul; Lin, Daoyi] Nanyang Technol Univ, Wee Kim Wee Sch Commun & Informat, Singapore 637718, Singapore; [Nguyen, Hoan] Univ Southern Calif, Annenberg Sch Commun & Journalism, Los Angeles, CA 90089 USA	Nanyang Technological University & National Institute of Education (NIE) Singapore; Nanyang Technological University; University of Southern California	Chib, A (corresponding author), Nanyang Technol Univ, Wee Kim Wee Sch Commun & Informat, Singapore 637718, Singapore.	arulchib@ntu.edu.sg		Chib, Arul/0000-0002-3833-8889	Wee Kim Wee School of Communication and Information, Nanyang Technological University	Wee Kim Wee School of Communication and Information, Nanyang Technological University(Nanyang Technological University)	The study was funded by a grant from Wee Kim Wee School of Communication and Information, Nanyang Technological University.		56	6	6	2	24	OXFORD UNIV PRESS INC	CARY	JOURNALS DEPT, 2001 EVANS RD, CARY, NC 27513 USA	1083-6101			J COMPUT-MEDIAT COMM	J. Comput.-Mediat. Commun.	MAR	2021	26	2
J	Aravena, M; Campos-Soto, MN; Rodríguez-Jiménez, C				Aravena, Margarita; Natalia Campos-Soto, Maria; Rodriguez-Jimenez, Carmen			Learning Strategies at a Higher Taxonomic Level in Primary Education Students in the Digital Age	SUSTAINABILITY			English	Article						higher thinking; cognitive skills; perspective analysis; abstraction; ICT; digital		The education system must respond to the demands and needs of today's society. To meet this demand, teachers must identify the degree of cognitive skills that our students possess through digital learning strategies that encourage the development of these superior skills because of the impact of technological resources on student motivation. To carry out this assessment, two types of strategy tes…	[Aravena, Margarita] Univ Andres Bello, Fac Educ & Social Sci, Postgrad Acad, Republ 470 Piso 1, Santiago 8370227, Chile; [Natalia Campos-Soto, Maria; Rodriguez-Jimenez, Carmen] Univ Granada, Dept Didact & Sch Org, Granada 18010, Spain	Universidad Andres Bello; University of Granada	Campos-Soto, MN (corresponding author), Univ Granada, Dept Didact & Sch Org, Granada 18010, Spain.	marg.aravena@uandresbello.edu; ncampos@ugr.es; carmenrj@ugr.es	Jiménez, Carmen Rodríguez/AAS-5135-2021; Aravena, Margarita/AAD-8079-2021	Rodriguez Jimenez, Carmen/0000-0001-8623-8316; Aravena Gaete, Margarita Ercilia/0000-0003-3198-8384; Campos Soto, Maria Natalia/0000-0002-3361-2930					41	6	6	0	6	MDPI	BASEL	ST ALBAN-ANLAGE 66, CH-4052 BASEL, SWITZERLAND		2071-1050		SUSTAINABILITY-BASEL	Sustainability	DEC	2020	12	23
J	Grimaldi, D; Diaz, J; Arboleda, H; Fernandez, V				Grimaldi, Didier; Diaz, Javier; Arboleda, Hugo; Fernandez, Vicenc			Data maturity analysis and business performance. A Colombian case study	HELIYON			English	Article						Business; Computer science; Information science; Economics; Colombia; Data science; Competitive analytics; Qualitative comparative analysis; Business performance	BIG DATA; MANAGEMENT	Context: Colombia over the last decade has experienced a historic economic boom and Information Technology (IT) has been emerging as a tool to enable the competitiveness of companies. The last government (2014-2018) took different actions to explain how the use of data science and open data improve the business activity. The question to identify if there is a relationship between IT capacities, t…	[Grimaldi, Didier] Ramon Llull Univ, Dept Strategy Entrepreneurship & Innovat, La Salle Campus,St Joan La Salle 42, Barcelona 08022, Spain; [Diaz, Javier; Arboleda, Hugo] Univ Icesi, Calle 18 122-135, Cali, Colombia; [Fernandez, Vicenc] Univ Politecn Catalunya BarcelonaTech, Dept Management, ETSEIAT, Colom 11,TR6,3-17, Terrassa 08222, Spain	Universitat Ramon Llull; Universidad ICESI; Universitat Politecnica de Catalunya	Grimaldi, D (corresponding author), Ramon Llull Univ, Dept Strategy Entrepreneurship & Innovat, La Salle Campus,St Joan La Salle 42, Barcelona 08022, Spain.	didierg@salleurl.edu	Grimaldi, Didier/JFK-4629-2023; Grimaldi, Didier/G-3882-2016	Grimaldi, Didier/0000-0002-1027-1176; Arboleda, Hugo/0000-0001-8806-2393					38	6	7	0	17	ELSEVIER SCI LTD	OXFORD	THE BOULEVARD, LANGFORD LANE, KIDLINGTON, OXFORD OX5 1GB, OXON, ENGLAND		2405-8440		HELIYON	Heliyon	AUG	2019	5	8
J	Dombrowski, T; Dazert, S; Volkenstein, S				Dombrowski, Tobias; Dazert, Stefan; Volkenstein, Stefan			Strategies of Digitized Learning	LARYNGO-RHINO-OTOLOGIE			German	Article						e-learning; digital teaching; digitization; academic teaching; curriculum; medical education	MEDICAL-EDUCATION; FLIPPED CLASSROOM; EMERGENCY-MEDICINE; SIMULATION; CURRICULUM; LECTURE; IMPACT; GAMIFICATION; SATISFACTION; EXPERIENCE	The development of digital strategies in teaching is based on the technological progress of the last decades, but also on the strong motivation to focus a didactic concept on the learning individuals. The available data of German medical faculties indicate that digital teaching concepts currently play a subordinate role in medicine in general and specifically in otorhinolaryngology. By assessing …	[Dombrowski, Tobias; Dazert, Stefan; Volkenstein, Stefan] Ruhr Univ Bochum, St Elisabeth Hosp, Klin Hals Nasen Ohrenheilkunde Kopf & Halschirurg, Bochum, Germany	Ruhr University Bochum	Dombrowski, T (corresponding author), St Elizabeth Hosp, Univ HNO Klin, Bleichstr 15, D-44787 Bochum, Germany.	tobias.dombrowski@rub.de	Volkenstein, Stefan/AAW-3829-2021; Volkenstein, Stefan/AAD-2719-2019						81	6	6	1	24	GEORG THIEME VERLAG KG	STUTTGART	RUDIGERSTR 14, D-70469 STUTTGART, GERMANY	0935-8943	1438-8685		LARYNGO RHINO OTOL	Laryngo-Rhino-Otol.	MAR	2019	98
J	Tiernan, P; O'Kelly, J				Tiernan, Peter; O'Kelly, Jane			Learning with digital video in second level schools in Ireland	EDUCATION AND INFORMATION TECHNOLOGIES			English	Article						Online video; Digital video; Second level teaching; Digital learning; secondary schools teaching		Research indicates that teenagers and young adults of second level school age in Ireland are increasingly immersed in world of technology. Online video accounts for much of their time spent online, and is often used for education purposes. While Irish government initiatives such as the Digital Strategy for Schools (2015-2020) aim to encourage integration of technology in the school system, exposu…	[Tiernan, Peter] Dublin City Univ, Inst Educ, C320,St Patricks Campus, Dublin 9, Ireland; [O'Kelly, Jane] Dublin City Univ, Inst Educ, Mov26,St Patricks Campus, Dublin 9, Ireland	Dublin City University; Dublin City University	Tiernan, P (corresponding author), Dublin City Univ, Inst Educ, C320,St Patricks Campus, Dublin 9, Ireland.	Peter.d.tiernan@dcu.ie; jane.okelly@dcu.ie	Tiernan, Peter/AAN-8917-2021; O'Kelly, Jane/ABD-5001-2020						46	6	6	0	19	SPRINGER	NEW YORK	ONE NEW YORK PLAZA, SUITE 4600, NEW YORK, NY, UNITED STATES	1360-2357	1573-7608		EDUC INF TECHNOL	Educ. Inf. Technol.	MAR	2019	24	2
J	Castillo, JGD; Cohernour, EJC; Barberà, E				Dominguez Castillo, J. Gabriel; Cisneros Cohernour, Edith J.; Barbera, Elena			Factors influencing technology use by Mayan women in the digital age	GENDER TECHNOLOGY & DEVELOPMENT			English	Article						Digital divide; gender; technology; socioeconomic development; ICTs; training program	DIVIDE; GENDER; INFORMATION	We explore gender differences in technology use among Mayan-speakers in a rural community in southern Yucatan (Mexico), finding that women had poorer skills and less access to technology than men. Following a diagnosis, information and communication technology (ICT) skills training aimed at closing the digital divide was provided to 68 men and women, with post-test results indicating that while w…	[Dominguez Castillo, J. Gabriel] Autonomous Univ Yucatan, Ctr Pedag Innovat, Fac Accounting & Adm, Yucatan, Mexico; [Cisneros Cohernour, Edith J.] Autonomous Univ Yucatan, Grad & Res Unit, Coll Educ, Yucatan, Mexico; [Barbera, Elena] Univ Oberta Catalunya, Psychol & Educ Studies, Barcelona, Spain	Universidad Autonoma de Yucatan; Universidad Autonoma de Yucatan; UOC Universitat Oberta de Catalunya	Cohernour, EJC (corresponding author), Autonomous Univ Yucatan, Coll Educ, Grad & Res Unit, Km 1 Carretera Merida Tizimin, Cholul 97305, Yucatan, Mexico.	cchacon@correo.uady.mx	Cisneros-Cohernour, Edith J./D-9197-2016	Cisneros-Cohernour, Edith J./0000-0003-2319-1519					84	6	6	0	6	ROUTLEDGE JOURNALS, TAYLOR & FRANCIS LTD	ABINGDON	2-4 PARK SQUARE, MILTON PARK, ABINGDON OX14 4RN, OXON, ENGLAND	0971-8524	0973-0656		GEND TECHNOL DEV	Gend. Technol. Dev.		2018	22	3
J	Gainous, J; Segal, A; Wagner, K				Gainous, Jason; Segal, Andrew; Wagner, Kevin			Is the equalization/normalization lens dead? Social media campaigning in US congressional elections	ONLINE INFORMATION REVIEW			English	Article						Elections; Social media; Equalization/normalization; Political campaigns	INTERNET USE; POLITICAL-PARTICIPATION; DIGITAL MEDIA; ENGAGEMENT; METAANALYSIS; INFORMATION; PATTERNS; KLOUT; TIME	Purpose - Early information technology scholarship centered on the internet's potential to be a democratizing force was often framed using an equalization/normalization lens arguing that either the internet was going to be an equalizing force bringing power to the masses, or it was going to be normalized into the existing power structure. The purpose of this paper is to argue that considered over…	[Gainous, Jason] Univ Louisville, Dept Polit Sci, Louisville, KY 40292 USA; [Segal, Andrew] Univ Texas Austin, Dept Polit Sci, Austin, TX 78712 USA; [Wagner, Kevin] Florida Atlantic Univ, Dept Polit Sci, Boca Raton, FL 33431 USA	University of Louisville; University of Texas System; University of Texas Austin; State University System of Florida; Florida Atlantic University	Gainous, J (corresponding author), Univ Louisville, Dept Polit Sci, Louisville, KY 40292 USA.	jason.gainous@louisville.edu	Wagner, Kevin/AAW-7074-2021; Gainous, Jason/AAS-1321-2020	Gainous, Jason/0000-0002-3104-2313; Wagner, Kevin/0000-0003-4750-9739					44	6	6	0	6	EMERALD GROUP PUBLISHING LTD	BINGLEY	HOWARD HOUSE, WAGON LANE, BINGLEY BD16 1WA, W YORKSHIRE, ENGLAND	1468-4527	1468-4535		ONLINE INFORM REV	Online Inf. Rev.		2018	42	5
J	Luque, SG; Simón, IV; Becerra, TD				Giraldo Luque, Santiago; Villegas Simon, Isabel; Duran Becerra, Tomas			Use of the websites of parliaments to promote citizen deliberation in the process of public decision-making. Comparative study of ten countries (America and Europe)	COMMUNICATION & SOCIETY-SPAIN			English	Article						Parliaments; Internet; Citizen participation; Public sphere; Deliberation; Deliberative democracy	NETWORKS	This study develops a longitudinal research (2010-2015) on 10 countries - 5 European countries (France, United Kingdom, Sweden, Italy and Spain) and 5 American countries (Argentina, Ecuador, Chile, Colombia and the USA). The aim is to compare how the parliaments use its official websites in order to promote the political participation process in the citizenship. The study focuses on the deliberat…	[Giraldo Luque, Santiago; Villegas Simon, Isabel; Duran Becerra, Tomas] Univ Autonoma Barcelona, Barcelona, Spain	Autonomous University of Barcelona	Luque, SG (corresponding author), Univ Autonoma Barcelona, Barcelona, Spain.	santiago.giraldo@uab.cat; isabelmaria.villegas@uab.cat; tomas.duran@uab.cat	Becerra, Tomás Durán/P-3386-2018; Simón, Isabel Villegas/AAC-3345-2021; Giraldo-Luque, Santiago/L-6662-2015	Becerra, Tomás Durán/0000-0002-5332-8785; Simón, Isabel Villegas/0000-0003-3064-6876; Giraldo Luque, Santiago/0000-0003-0024-7081					71	6	8	0	7	UNIV NAVARRA, SERVICIO PUBLICACIONES	PAMPLONA	CAMPUS UNIV, CARRETERA DEL SADAR S-N, APARTADO 177, 31080 PAMPLONA, SPAIN	2386-7876			COMMUN SOC-SPAIN	Commun. Soc.-Spain		2017	30	4
J	Guo, S; Ding, W; Lanshina, T				Guo, S.; Ding, W.; Lanshina, T.			Global Governance and the Role of the G20 in the Emerging Digital Economy	VESTNIK MEZHDUNARODNYKH ORGANIZATSII-INTERNATIONAL ORGANISATIONS RESEARCH JOURNAL			Russian	Article						digital economy; Global governance; G20; BRICS		Recent decades have seen a rapid digital transformation resulting in important and sometimes crucial changes in business, society and the global economy. After the global crisis of 2008-2009, digital industries have been the most dynamic and promising in the global economy. Still, the world has not yet found abalance between the benefits and risks of a digital economy and thus global governance i…	[Guo, S.; Ding, W.] SISU, SIRPA, 550 Dalian Rd W, Shanghai 200083, Peoples R China; [Lanshina, T.] Russian Presidential Acad Natl Econ & Publ Adm RA, Ctr Econ Modeling Energy & Environm, Bldg 1,82 Prospect Vernadskogo, Moscow 119571, Russia; [Lanshina, T.] Russian Acad Sci ISKRAN, Ctr Ind Studies, Inst US & Canadian Studies, Bldg 1,82 Prospect Vernadskogo, Moscow 119571, Russia	Shanghai International Studies University; Russian Presidential Academy of National Economy & Public Administration; Russian Academy of Sciences; Institute for the US & Canadian Studies, Russian Academy of Sciences	Guo, S (corresponding author), SISU, SIRPA, 550 Dalian Rd W, Shanghai 200083, Peoples R China.	syguo@shisu.edu.cn; dwh1010@foxmail.com; lanshina@ranepa.ru	Lanshina, Tatiana/AAJ-1594-2021						26	6	6	1	28	NATL RESEARCH UNIV HIGHER SCH ECONOMICS	MOSCOW	SHABOLOVKA, 26, MOSCOW, 119049, RUSSIA	1996-7845			VESTN MEZHDUNARODNYK	Vestn. Mezhdunarodnykh Organ.		2017	12	4
J	Solovey, VD				Solovey, V. D.			DIGITAL MYTHOLOGY AND DONALD TRUMP ELECTORAL CAMPAIGN	POLIS-POLITICHESKIYE ISSLEDOVANIYA			Russian	Article						Internet; social media; Google; Facebook; Twitter; Big Data; politics; electoral campaign; Donald Trump; Hillary Clinton; digital strategy; microtargeting	COLLECTIVE IDENTITY; SOCIAL MEDIA; MOVEMENTS; PROTEST	The article examines the relevance of the so-called 'digital myths' on the example of Donald Trump presidential electoral campaign. The statement about a change of the very quality of politics and its nature in the course of transition to a digital context is the main among digital myths. The article claims that the key condition of Trump's victory was not an extensive use of digital tools, but a…	[Solovey, V. D.] MGIMO Univ, MFA Russia, Moscow State Inst Int Relat, Dept Publ Relat, Moscow, Russia	MGIMO University	Solovey, VD (corresponding author), MGIMO Univ, MFA Russia, Moscow State Inst Int Relat, Dept Publ Relat, Moscow, Russia.	valery.solovei@gmail.com							24	6	8	0	23	RUSSIAN ACAD SCIENCES	MOSCOW	LENINSKII AVENUE, 14, MOSCOW, 119991, RUSSIA	1026-9487	1684-0070		POLIS	Polis		2017		5
J	Fandiño, YJ				Jose Fandino, Yamith			21st Century Skills and the English Foreign Language Classroom: A Call for More Awareness in Colombia	GIST-EDUCATION AND LEARNING RESEARCH JOURNAL			English	Article						21st century skills; new literacies; technology; English language teaching; English as a foreign language	MULTILITERACIES	The 21st century demands the explicit integration of learning strategies, digital competences and career abilities. Schools in general and EFL classrooms in particular should provide students with practices and processes focused on acquiring and developing, among other things, creativity, critical thinking, collaboration, self-direction, and cross-cultural skills. In this regard, the Partnership …	[Jose Fandino, Yamith] La Salle Univ, Sch Educ Sci, Bogota, Colombia	Universidad de La Salle	Fandiño, YJ (corresponding author), La Salle Univ, Sch Educ Sci, Bogota, Colombia.	yfandino@unisalle.edu.co	FandiÃ±o Parra, Yamith Jose/N-6508-2014; Fandiño Parra, Yamith José/AAA-9047-2021	FandiÃ±o Parra, Yamith Jose/0000-0002-5567-5465; Fandiño Parra, Yamith José/0000-0002-5567-5465					50	6	8	1	4	INST UNIV COLOMBO AMERICANA-UNICA	BOGOTA	CALLE 19 NO 2A-49 SEGUNDO PISO, BOGOTA, 00000, COLOMBIA	1692-5777			GIST-EDUC LEARN RES	GIST-Educ. Learn. Res. J.	NOV	2013		7
J	Chen, QM; Zhang, W; Jin, NS; Wang, XC; Dai, PR				Chen, Qingmei; Zhang, Wei; Jin, Nanshun; Wang, Xiaocheng; Dai, Peiru			Digital Transformation Evaluation for Small- and Medium-Sized Manufacturing Enterprises Using the Fuzzy Synthetic Method DEMATEL-ANP	SUSTAINABILITY			English	Article						digital transformation; decision-making test and evaluation laboratory methods; network analytic hierarchy process; fuzzy comprehensive evaluation; small- and medium enterprises	INDUSTRY 4.0 READINESS; MATURITY MODEL; ENTREPRENEURS; COMPETENCE; RESOURCES; FIRMS	In view of the characteristics of small- and medium-sized manufacturing enterprises and the status quo of digitalization, it is necessary to develop a more applicable digital transformation maturity model. The decision testing and evaluation laboratory method (DEMATEL) is used to provide the visual impact relationship between digital transformation criteria, and combined with the network analytic…	[Chen, Qingmei; Zhang, Wei; Jin, Nanshun; Wang, Xiaocheng; Dai, Peiru] Guangdong Univ Sci & Technol, Sch Management, Dongguan 523000, Peoples R China	Guangdong University of Science & Technology	Chen, QM; Zhang, W (corresponding author), Guangdong Univ Sci & Technol, Sch Management, Dongguan 523000, Peoples R China.	amaze1211@163.com; zw1010551@whu.edu.cn			The 2020 Guangdong Provincial Department of Education Youth Innovation Talents Project Research on the Status Quo and Maturity Evaluation of Digital Transformation of Small and Medium sized Manufacturing Enterprises in Dongguan [2020WQNCX077]; 2021 Research on Digital Transformation of Manufacturing Industry in Guangdong Province, a project of Guangdong Provincial Department of Education to impro…	The 2020 Guangdong Provincial Department of Education Youth Innovation Talents Project Research on the Status Quo and Maturity Evaluation of Digital Transformation of Small and Medium sized Manufacturing Enterprises in Dongguan; 2021 Research on Digital Transformation of Manufacturing Industry in Guangdong Province, a project of Guangdong Provincial Department of Education to improve the scientif…	This research was funded by the following two projects. The 2020 Guangdong Provincial Department of Education Youth Innovation Talents Project Research on the Status Quo and Maturity Evaluation of Digital Transformation of Small and Medium sized Manufacturing Enterprises in Dongguan (Project No.: 2020WQNCX077), which was initiated on 28 September 2020. And the 2021 Research on Digital Transformat…		55	5	5	43	117	MDPI	BASEL	ST ALBAN-ANLAGE 66, CH-4052 BASEL, SWITZERLAND		2071-1050		SUSTAINABILITY-BASEL	Sustainability	OCT	2022	14	20
J	Pilares, ICA; Azam, S; Akbulut, S; Jonkman, M; Shanmugam, B				Pilares, Iris Cathrina Abacan; Azam, Sami; Akbulut, Serkan; Jonkman, Mirjam; Shanmugam, Bharanidharan			Addressing the Challenges of Electronic Health Records Using Blockchain and IPFS	SENSORS			English	Article						blockchain; cryptography; electronic health record; privacy; security; distributed file system	EHR; IMPLEMENTATION; SECURITY; ADOPTION; SYSTEMS; SCHEME; ISSUES	Electronic Health Records (EHR) are the healthcare sector's core digital strategy meant to improve the quality of care provided to patients. Despite the benefits afforded by this digital transformation initiative, adoption among healthcare organizations has been slower than desired. The sheer volume and sensitive nature of patient records compel these organizations to exercise a healthy amount of…	[Pilares, Iris Cathrina Abacan; Azam, Sami; Akbulut, Serkan; Jonkman, Mirjam; Shanmugam, Bharanidharan] Charles Darwin Univ, Coll Engn IT & Environm, Ellengowan Dr, Casuarina, NT 0810, Australia	Charles Darwin University	Azam, S (corresponding author), Charles Darwin Univ, Coll Engn IT & Environm, Ellengowan Dr, Casuarina, NT 0810, Australia.	iris.abacan@gmail.com; sami.azam@cdu.edu.au; s3rkanakbulut@gmail.com; mirjam.jonkman@cdu.edu.au; bharanidharan.shanmugam@cdu.edu.au	; Shanmugam, Bharanidharan/C-3611-2011	Azam, Sami/0000-0001-7572-9750; Shanmugam, Bharanidharan/0000-0002-2591-1949; AKBULUT, Serkan/0000-0002-4893-1379					102	5	5	4	17	MDPI	BASEL	ST ALBAN-ANLAGE 66, CH-4052 BASEL, SWITZERLAND		1424-8220		SENSORS-BASEL	Sensors	JUN	2022	22	11
J	Sakas, DP; Giannakopoulos, NT; Kanellos, N; Tryfonopoulos, C				Sakas, Damianos P.; Giannakopoulos, Nikolaos T.; Kanellos, Nikos; Tryfonopoulos, Christos			Digital Marketing Enhancement of Cryptocurrency Websites through Customer Innovative Data Process	PROCESSES			English	Article						strategic digital marketing; innovation process; decentralized systems; data analysis; web analytics; customer electronics; decision support systems	ADOPTION; SYSTEMS	Today, more than ever, the popularity of decentralized payment systems has risen, creating an outbreak of new cryptocurrencies hitting the market. Unique websites have been staged for each cryptocurrency, where information and means for mining cryptocurrencies are available daily. People visit those cryptocurrency websites either from desktop or mobile devices. Thus, the impulsion for appropriate…	[Sakas, Damianos P.; Giannakopoulos, Nikolaos T.; Kanellos, Nikos] Agr Univ Athens, Sch Appl Econ & Social Sci, Dept Agribusiness & Supply Chain Management, Business Informat & Commun Technol Value Chains L, Athens 11855, Greece; [Tryfonopoulos, Christos] Univ Peloponnese, Dept Informat & Telecommun, Karaiskaki 70, Tripoli 22100, Greece	Agricultural University of Athens; University of Peloponnese	Giannakopoulos, NT (corresponding author), Agr Univ Athens, Sch Appl Econ & Social Sci, Dept Agribusiness & Supply Chain Management, Business Informat & Commun Technol Value Chains L, Athens 11855, Greece.	d.sakas@aua.gr; n.giannakopoulos@aua.gr; nikos.kanellos2@aua.gr; trifon@uop.gr	Giannakopoulos, Nikolaos/HZJ-9352-2023; Tryfonopoulos, Christos/HKW-5651-2023	Sakas, Damianos/0000-0002-2253-8966; Tryfonopoulos, Christos/0000-0003-0640-9088; Giannakopoulos, Nikolaos T./0000-0002-4480-5893					77	5	5	2	7	MDPI	BASEL	ST ALBAN-ANLAGE 66, CH-4052 BASEL, SWITZERLAND		2227-9717		PROCESSES	Processes	MAY	2022	10	5
J	Liu, LJ; Fan, Q; Liu, RH; Zhang, GQ; Wan, WH; Long, J				Liu, Longjun; Fan, Qing; Liu, Ruhong; Zhang, Guiqing; Wan, Wenhai; Long, Jing			How to benefit from digital platform capabilities? Examining the role of knowledge bases and organisational routines updating	EUROPEAN JOURNAL OF INNOVATION MANAGEMENT			English	Article						Digital platform capabilities; Knowledge bases; Technological innovation; Organisational routines; Resource-based view	RESOURCE-BASED VIEW; RESEARCH-AND-DEVELOPMENT; COMPETITIVE ADVANTAGE; FIRM PERFORMANCE; INFORMATION-TECHNOLOGY; INNOVATION; PRODUCT; BREADTH; DEPTH; FLEXIBILITY	Purpose This study aims to explore whether digital platform capabilities (integration and reconstruction) affect technological innovation through knowledge bases in the dimensions of breadth and depth and the moderating role of organisational routines updating. Design/methodology/approach Hierarchical regression, mediation effect test macro and bootstrap were conducted to empirically analyse two …	[Liu, Longjun; Liu, Ruhong; Long, Jing] Nanjing Univ, Sch Business, Nanjing, Peoples R China; [Fan, Qing] Shanghai Univ, Sch Management, Shanghai, Peoples R China; [Zhang, Guiqing] Hohai Univ, Business Sch, Nanjing, Peoples R China; [Wan, Wenhai] Huaqiao Univ, Sch Business Adm, Quanzhou, Peoples R China	Nanjing University; Shanghai University; Hohai University; Huaqiao University	Long, J (corresponding author), Nanjing Univ, Sch Business, Nanjing, Peoples R China.	longjing@nju.edu.cn		Zhang, Guiqing/0000-0002-6706-1946; Fan, Qing/0000-0001-5179-921X; Liu, Longjun/0000-0002-6495-1695					93	5	5	55	182	EMERALD GROUP PUBLISHING LTD	Leeds	floor 5, Northspring 21-23 Wellington Street, Leeds, W YORKSHIRE, ENGLAND	1460-1060	1758-7115		EUR J INNOV MANAG	Eur. J. Innov. Manag.	AUG 29	2023	26	5
J	Rundel, C; Salemink, K				Rundel, Christina; Salemink, Koen			Hubs, hopes and high stakes for a relatively disadvantaged low tech place	LOCAL ECONOMY			English	Article						rural digital hub; digital strategy; place-based approach; rural proofing; hub concept	COMMUNITY	The transition to a digitally inclusive and knowledge-based rural society can be challenging. Digital hubs are often proposed as a way of overcoming digital exclusion in rural and small-town contexts, yet studies into how to set up such a hub in these challenging contexts are scarce. While hubs are usually associated with an urban environment, this case study deals with the development of a rural…	[Rundel, Christina; Salemink, Koen] Univ Groningen, Dept Cultural Geog, POB 800, NL-9700 AV Groningen, Netherlands	University of Groningen	Rundel, C (corresponding author), Univ Groningen, Dept Cultural Geog, POB 800, NL-9700 AV Groningen, Netherlands.	c.t.rundel@rug.nl		Salemink, Koen/0000-0002-9331-7343; Rundel, Christina/0000-0002-3687-9198	EU Interreg VB North Sea Region Programme (CORA project); EU Interreg VB North Sea Region Programme (COM3 project)	EU Interreg VB North Sea Region Programme (CORA project)(Interreg Europe); EU Interreg VB North Sea Region Programme (COM3 project)(Interreg Europe)	The author(s) disclosed receipt of the following financial support for the research, authorship, and/or publication of this article: This research would not have been possible without the funding we received from the EU Interreg VB North Sea Region Programme (CORA and COM3 project).		49	5	5	0	7	SAGE PUBLICATIONS LTD	LONDON	1 OLIVERS YARD, 55 CITY ROAD, LONDON EC1Y 1SP, ENGLAND	0269-0942	1470-9325		LOCAL ECON	Local Econ.	NOV	2021	36	7-8
J	Sakas, DP; Giannakopoulos, NT; Kanellos, N; Migkos, SP				Sakas, Damianos P.; Giannakopoulos, Nikolaos T.; Kanellos, Nikos; Migkos, Stavros P.			Innovative Cryptocurrency Trade Websites' Marketing Strategy Refinement, via Digital Behavior	IEEE ACCESS			English	Article						Cryptocurrency; Behavioral sciences; Organizations; Measurement; Blockchains; Costs; Technological innovation; Strategic digital marketing; digital behavior; innovation; decentralized payment networks; big data; e-commerce; decision support systems	ADOPTION; SYSTEMS	Nowadays, the cryptocurrency market is thriving, through the rise in cryptocurrency trading, opening the way for cryptocurrency trading websites' optimization. Optimization of customer satisfaction is a vital part of cryptocurrency trade organizations' digital marketing problems. It is vital to keep digital advertisement costs low while driving more traffic to a website. This study aims to define…	[Sakas, Damianos P.; Giannakopoulos, Nikolaos T.; Kanellos, Nikos] Agr Univ Athens, Sch Appl Econ & Social Sci, Dept Agribusiness & Supply Chain Management, BICTEVAC Lab, Athens 11855, Greece; [Migkos, Stavros P.] Univ Western Macedonia, Sch Econ Sci, Dept Int & European Econ Studies, Kozani 50100, Greece	Agricultural University of Athens; University of Western Macedonia	Giannakopoulos, NT (corresponding author), Agr Univ Athens, Sch Appl Econ & Social Sci, Dept Agribusiness & Supply Chain Management, BICTEVAC Lab, Athens 11855, Greece.	n.giannakopoulos@aua.gr	Giannakopoulos, Nikolaos/HZJ-9352-2023	Giannakopoulos, Nikolaos T./0000-0002-4480-5893; Migkos, Stavros/0000-0003-2356-5568					72	5	5	5	18	IEEE-INST ELECTRICAL ELECTRONICS ENGINEERS INC	PISCATAWAY	445 HOES LANE, PISCATAWAY, NJ 08855-4141 USA	2169-3536			IEEE ACCESS	IEEE Access		2022	10
J	Palmer, L				Palmer, Lindsay			Press Freedom during Covid-19: The Digital Discourses of the International Press Institute, Reporters Sans Frontieres, and the Committee to Protect Journalists	DIGITAL JOURNALISM			English	Article						Covid-19; pandemic; coronavirus; press freedom; Committee to Protect Journalists; International Press Institute; Reporters sans Frontieres; Twitter	MEDIA; COMMUNICATION; NEWS	This study explores the ways in which global press freedom watchdogs have discursively constructed the issue of press freedom during the Covid-19 pandemic. Drawing on a multimodal discourse analysis, the study examines web stories and Tweets posted by the International Press Institute (IPI), the Committee to Protect Journalists (CPJ), and Reporters sans Frontieres (RSF), with the purpose of answe…	[Palmer, Lindsay] Univ Wisconsin, Sch Journalism & Mass Commun, Madison, WI 53706 USA	University of Wisconsin System; University of Wisconsin Madison	Palmer, L (corresponding author), Univ Wisconsin, Sch Journalism & Mass Commun, Madison, WI 53706 USA.	lindsay.palmer@wisc.edu							62	5	5	2	22	ROUTLEDGE JOURNALS, TAYLOR & FRANCIS LTD	ABINGDON	2-4 PARK SQUARE, MILTON PARK, ABINGDON OX14 4RN, OXON, ENGLAND	2167-0811	2167-082X		DIGIT JOURNAL	Digit. Journal.	JUL 3	2022	10	6
J	Kimura, M				Kimura, Makoto			Customer segment transition through the customer loyalty program	ASIA PACIFIC JOURNAL OF MARKETING AND LOGISTICS			English	Article						Customer journey; Customer loyalty; Smartphone app; Digital strategy; Forecasting; System dynamics		Purpose This study presents the applicability of a model-based approach for loyalty program forecasting using smartphone app in the digital strategy of the retail industry. Design/methodology/approach The authors develop a dynamic model with the cyclical structure of customer segments through customer experience. They use time-series data on the number of members of the loyalty program, Seven Mil…	[Kimura, Makoto] Niigata Univ Int & Informat Studies, Dept Business Adm, Niigata, Japan	Niigata University	Kimura, M (corresponding author), Niigata Univ Int & Informat Studies, Dept Business Adm, Niigata, Japan.	mkimura@nuis.ac.jp	Kimura, Makoto/ABA-6662-2021; Kimura, Makoto/F-8018-2016	Kimura, Makoto/0000-0002-2733-628X; Kimura, Makoto/0000-0002-2733-628X	JSPS KAKENHI [JP17K04017, JP19H01534]	JSPS KAKENHI(Ministry of Education, Culture, Sports, Science and Technology, Japan (MEXT)Japan Society for the Promotion of ScienceGrants-in-Aid for Scientific Research (KAKENHI))	Funding: This work was supported by JSPS KAKENHI Grant Numbers JP17K04017, JP19H01534.		29	5	6	9	40	EMERALD GROUP PUBLISHING LTD	BINGLEY	HOWARD HOUSE, WAGON LANE, BINGLEY BD16 1WA, W YORKSHIRE, ENGLAND	1355-5855	1758-4248		ASIA PAC J MARKET LO	Asia Pac. J. Market. Logist.	FEB 14	2022	34	3
J	Kilcoyne, A				Kilcoyne, Anthony			Living and learning with Covid-19: re-imagining the digital strategy for schools in Ireland	IRISH EDUCATIONAL STUDIES			English	Article						Covid-19; policy enactment; policy actors; school context; online practices	POLICY ENACTMENTS	This article explores how the digital strategy for schools policy 2015-2020, Ireland's national digital technology in education policy and its enactment in schools prepared them for school closures as part of the Covid-19 response. The educational, economic and social context in which the digital strategy for schools was published in 2015 was vastly different from the current living with Covid-19…	[Kilcoyne, Anthony] Natl Univ Ireland Galway, Sch Educ, Galway, Ireland	Ollscoil na Gaillimhe-University of Galway	Kilcoyne, A (corresponding author), Natl Univ Ireland Galway, Sch Educ, Galway, Ireland.	a.kilcoyne1@nuigalway.ie							17	5	5	0	12	ROUTLEDGE JOURNALS, TAYLOR & FRANCIS LTD	ABINGDON	2-4 PARK SQUARE, MILTON PARK, ABINGDON OX14 4RN, OXON, ENGLAND	0332-3315	1747-4965		IRISH EDUC STUD	Ir. Educ. Stud.	APR 3	2021	40	2
J	Miravete, ADF; Espinosa, MPP				Fernandez Miravete, Angel David; Prendes Espinosa, Maria Paz			Analysis of the digitization process of a Secondary School from the DigCompOrg model	REVISTA LATINOAMERICANA DE TECNOLOGIA EDUCATIVA-RELATEC			Spanish	Article						Digital Competence; Digital Culture; Secondary Education; Educational Organization; Technology Of The Information And Communication	DIGITAL COMPETENCE; INFORMATION; EDUCATION; LITERACY; REGION	The achievement of digital competence among students has become a main objective within Spanish educational policies in recent decades. In this regard, the European Framework for Digitally Competent Educational Organizations (DigCompOrg) guides schools in their digitization process in a systematic way. This research evaluates the degree of development of the use of learning technologies in a seco…	[Fernandez Miravete, Angel David; Prendes Espinosa, Maria Paz] Dept Didact & Org Escolar, Fac Educ, Campus Espinardo, Murcia 30100, Spain	University of Murcia	Miravete, ADF (corresponding author), Dept Didact & Org Escolar, Fac Educ, Campus Espinardo, Murcia 30100, Spain.	angeldavid.fernandez@um.es; pazprend@um.es	Prendes-Espinosa, Paz/B-3887-2014	Prendes-Espinosa, Paz/0000-0001-8375-5983					48	5	5	5	17	UNIV EXTREMADURA, FAC EDUCACION	BADAJOZ	AV ELVAS S-N, BADAJOZ, 06071, SPAIN	1695-288X			REV LATINOAM TECNOL	Rev. Latinoam. Tecnol. Educ.-RELATEC		2021	20	1
J	Barbalho, SCM; Dantas, RD				Macedo Barbalho, Sanderson Cesar; Dantas, Rafaela de Faria			The effect of islands of improvement on the maturity models for industry 4.0: the implementation of an inventory management system in a beverage factory	BRAZILIAN JOURNAL OF OPERATIONS & PRODUCTION MANAGEMENT			English	Article; Proceedings Paper	26th International Joint Conference on Industrial Engineering and Operations Management (IJCIECOM)	FEB, 2021	Pontif Catholic Univ Rio de Janeiro, Rio de Janeiro, BRAZIL		Pontif Catholic Univ Rio de Janeiro	Industry 4.0; Maturity Model; Logistics; Inventory; Storage Management Systems; RFID	READINESS	Goal: Industry 4.0 has the main purpose of turning the company into an agile organization and adapting continuously to the market's dynamicity. Thus, to reach this target, the business should be aware of its current readiness level and establish digital strategies to reach higher levels. This research aims to explore how improvements in industry 4.0 can improve companies' business processes. Desi…	[Macedo Barbalho, Sanderson Cesar] Univ Brasilia, Technol Coll, Dept Ind Engn, Postgraduat Program Mech Syst, Campus Darcy Ribeiro, Brasilia, DF, Brazil; [Dantas, Rafaela de Faria] Polytechn Univ Milan, Dept Engn Management, Msc Program Ind Management, Campus Masa, Milan, Italy	Universidade de Brasilia; Polytechnic University of Milan	Barbalho, SCM (corresponding author), Univ Brasilia, Technol Coll, Dept Ind Engn, Postgraduat Program Mech Syst, Campus Darcy Ribeiro, Brasilia, DF, Brazil.	sandersoncesar@unb.br	Barbalho, Sanderson C. M./H-4113-2015	Barbalho, Sanderson C. M./0000-0003-1664-4866					28	5	5	9	36	ASSOC BRASILEIRA ENGENHARIA PRODUCAO-ABEPRO	SAO PAULO	AV PROF ALMEIDA PRADO 531, 1O ANDAR, SALA 102, SAO PAULO, 05508-900, BRAZIL	2237-8960			BRAZ J OPER PROD MAN	Braz. J. Oper. Prod. Manag.		2021	18	3
J	Zhao, X				Zhao, Xin			Auditing the Me Inc.: Teaching personal branding on LinkedIn through an experiential learning method	COMMUNICATION TEACHER			English	Article							COMMUNICATION	Courses:Public Relations, Business and Professional Communication, Training and Development, Digital Media Strategies, Digital Communications. Objectives:By the end of the activity, students will be able to synthesize the key attributes of the notion of personal branding and to apply them in their future professional communications on social media.	[Zhao, Xin] Bournemouth Univ, Fac Media & Commun, Dept Commun & Journalism, Poole, Dorset, England	Bournemouth University	Zhao, X (corresponding author), Bournemouth Univ, Fac Media & Commun, Dept Commun & Journalism, Poole, Dorset, England.	xzhao@bournemouth.ac.uk	Zhao, Xin/AAT-5158-2020	Zhao, Xin/0000-0001-6853-7224					16	5	5	1	10	TAYLOR & FRANCIS LTD	ABINGDON	2-4 PARK SQUARE, MILTON PARK, ABINGDON OR14 4RN, OXON, ENGLAND	1740-4622	1740-4630		COMMUN TEACH	Commun. Teach.	JAN 2	2021	35	1
J	Zimand Sheiner, D; Earon, A				Zimand Sheiner, Dorit; Earon, Amir			Disruptions of account planning in the digital age	MARKETING INTELLIGENCE & PLANNING			English	Article						Big Data; Strategy; Advertising agencies; Account planning; Creative process; Digital strategy	ADVERTISING AGENCIES; DISCIPLINE; FUTURE	Purpose The purpose of this paper is to focus on transformations in the advertising industry from the point of view of the role and position of account planners. It questions the current viability of account planning (AP) as a result of digital disruptions. Design/methodology/approach In total, 18 face-to-face responsive interviews were conducted among professionals who hold planning responsibili…	[Zimand Sheiner, Dorit] Ariel Univ, Sch Commun, Strateg Commun Track, Ariel, Israel; [Earon, Amir] Sapir Coll, Dept Commun, Ashqelon, Israel	Ariel University	Zimand Sheiner, D (corresponding author), Ariel Univ, Sch Commun, Strateg Commun Track, Ariel, Israel.	doritzs@ariel.ac.il; amir.earon@gmail.com	Sheiner, Dorit Zimand/L-1946-2019	Sheiner, Dorit Zimand/0000-0003-3543-2260					38	5	5	4	49	EMERALD GROUP PUBLISHING LTD	BINGLEY	HOWARD HOUSE, WAGON LANE, BINGLEY BD16 1WA, W YORKSHIRE, ENGLAND	0263-4503	1758-8049		MARK INTELL PLAN	Mark. Intell. Plan.	APR 1	2019	37	2
J	Shepherd, T; Henderson, M				Shepherd, Tamara; Henderson, Monica			Digital Literacy in Digital Strategy	CANADIAN JOURNAL OF COMMUNICATION			English	Article						Digital literacy; Policy; Technology; Internet; Regulation	POLICY	This article discusses the role of digital literacy as a digital strategy policy goal in Canada. It reviews previous framings of digital literacy and suggests how they could be broadened to avoid an overly superficial treatment of Canadians' negotiation of digital culture and policymaking.	[Shepherd, Tamara; Henderson, Monica] Univ Calgary, Commun Media & Film, Calgary, AB, Canada	University of Calgary	Shepherd, T (corresponding author), Univ Calgary, Commun Media & Film, Calgary, AB, Canada.	tamara.shepherd@ucalgary.ca; monica.henderson2@ucalgary.ca							29	5	5	10	32	CANADIAN JOURNAL COMMUNICATION	VANCOUVER	C/O SIMON FRASER UNIV, 515 WEST HASTINGS ST, VANCOUVER, BC V6B 5K3, CANADA	0705-3657	1499-6642		CAN J COMMUN	Can. J. Commun.		2019	44	2
[truncated: 435 more rows]
[truncated: 22 more columns]

## Sheet: SDG
WOS:000285383200006	OR		WOS:000285383200006 OR WOS:000329754600009 OR WOS:000499922800012 OR WOS:000579529600028 OR WOS:000525321800016 OR WOS:000409101300005 OR WOS:000262030400012 OR WOS:000430518300004 OR WOS:000450369800001 OR WOS:000434026200008 OR WOS:000463302600003 OR WOS:000329754600011 OR WOS:000547612800001 OR WOS:000527393100011 OR WOS:000427902200001 OR WOS:000391015200003 OR WOS:000443003600020 OR WOS:0005…
[truncated: 673 more rows]

[truncated: 19 more sheets: SDG9, SDG3, SDG4, SDG12, SDG11, SDG01, SDG8, SDG10, SDG5, SDG16, SDG2, SDG7, SDG15, SDG13, SDG6, Lotka, Price, Indice H, Bradford]
